# Supplementary material for: Multi-Depot Routing with Split Deliveries: Models and a Branch-and-Cut Algorithm
Source: Atypon-hosted journal article supplement (doi:10.1287/trsc.2022.1179), 2022-10-14
Supplement: trsc.2022.1179.sm1.pdf [file trsc.2022.1179.sm1.pdf]

## Supplemental material

This e-companion is structured as follows: Section EC.1 contains the proofs of all statements of the main article. Section EC.2 contains further details concerning the separation of valid inequalities within the branch-and-cut framework. Sections EC.3 to EC.5 contain additional and detailed computational results for the MDS DVRP, the MDTSP, and the SDVRP, respectively. Finally, Section EC.6 contains result showing the impact of the heuristic used to initialize the B&C algorithm.

### EC.1. Proofs

#### EC.1.1. Proofs of Section 1.2 (solution properties)

PROPERTY 4 *There exists an optimal solution to the MDS DVRP in which at least one route contains at most one split node.*

*Proof.* Assume that there exists a solution satisfying Property 1 in which every route contains at least two split nodes. Let  $R_1$  be one such route containing split nodes  $s_1$  and  $s_2$ . Split node  $s_2$  must be contained in at least one additional route, say  $R_2$ . Due to Property 1, the latter route must contain a split node  $s_3$  that cannot be contained in a previously considered route, i.e.,  $s_3 \notin \{s_1, s_2\}$ . Continuing the argument one concludes that the last split node encountered in this procedure (say  $s_\ell$ ) is contained in only one route which contradicts the fact that  $s_\ell$  is a split node.  $\square$

#### EC.1.2. Proofs of Section 4 (capacity constraints)

THEOREM 1 *Capacity constraints (9) are valid for the MDS DVRP.*

*Proof.* Let  $S' \subseteq S$  be the subset of  $S$  such that  $q_i < Q$  for each  $i \in S'$  and whose nodes in  $S'$  are served via single-customer routes, i.e.,  $\bar{y}_i = 1, \forall i \in S'$ . Then, inequality (9) can be rewritten as

$$\bar{x}(E(S)) \leq \bar{z}(S) - \frac{q(S \setminus S')}{Q} - |S'|.$$

Since  $q_i < Q$  for each  $i \in S'$ , the demand of each node in  $S'$  can be satisfied by one single-customer route. Therefore  $\bar{x}(\delta(i)) = 0, \forall i \in S', \bar{x}(E(S')) = 0$ , and  $\bar{z}(S) = \bar{z}(S \setminus S') + |S'|$  which imply that the latter inequality reduces to

$$\bar{x}(E(S \setminus S')) \leq \bar{z}(S \setminus S') - \frac{q(S \setminus S')}{Q}$$

which is a weaker version of (8) for set  $S \setminus S'$  and therefore valid for the MDS DVRP.  $\square$

THEOREM 2 *Consider formulation (1) when generic capacity constraints (1f) are replaced by rounded capacity constraints (8) and  $y$ CAPs (9). There exist solutions to this formulation that are infeasible for the MDS DVRP even if the depot-consistency constraints are met.*

*Proof.* Consider the candidate solution given in Figure 2a. As discussed in Section 2, this candidate solution may only violate capacity constraints and is indeed infeasible when assuming  $Q = 7$ ,  $q_6 = 6$ , and  $q_i = 2$ ,  $i \in C \setminus \{6\}$ . Since no single-customer routes are used,  $y$ CAPs (9) are implied by rounded capacity constraints (8) and it therefore remains to show that none of the latter inequalities is violated. To this end, observe that  $\lceil q(S)/Q \rceil \leq 2$  for each  $S \subseteq C$  and  $\bar{z}(S) = |S| + 1$  for each  $S$  such that  $\bar{x}(E(S)) > 0$ . Thus,  $\bar{z}(S) - \lceil q(S)/Q \rceil \geq |S| - 1$  holds for each set  $S \subseteq C$  and the rounded capacity constraint (8) is therefore dominated by the subtour elimination constraint  $\bar{x}(E(S)) \leq |S| - 1$ . We conclude that the candidate solution does not violate the rounded capacity constraints (8) nor the  $y$ CAPS (9) despite exceeding the capacity limits of at least one vehicle. Since the depot-consistency constraints are trivially satisfied (as there is only one depot), the theorem follows.  $\square$

### EC.1.3. Proofs of Section 5.1 (path-elimination based constraints)

**THEOREM 3** *Multi-leg PE constraints (10) are valid for the MDSDVRP.*

*Proof.* Consider an arbitrary solution  $\mathcal{U}$  to the MDSDVRP and let

$$\sum_{j=1}^k x(\delta(i_j, I_j)) + y(S) + x(E(S)) \leq z(S) \quad (\text{EC.1})$$

be an arbitrary multi-leg PE inequality for  $S \subseteq C$ ,  $i_j \in S$ , and  $I_j \subseteq D$ ,  $i_j \neq i_p$ ,  $1 \leq j \neq p \leq k$ , as defined in (10). We will show that  $\mathcal{U}$  satisfies this inequality by induction on the number of vehicle routes from  $\mathcal{U}$  visiting at least one node from  $S$ .

We observe that all variables values implied by a set of empty routes are equal to zero. In this case, the left- and right-hand side of (EC.1) are equal to zero providing a proper start for our argument. Thus, assume that (EC.1) holds for the variable values associated with an arbitrary subset of the vehicle routes of  $\mathcal{U}$ . Let  $R = (d, u_1, u_2, \dots, u_\ell, d)$ ,  $d \in D$ ,  $u_i \in C$ ,  $u_i \neq u_j$ ,  $1 \leq i \neq j \leq \ell$ , be an arbitrary, not yet added route from  $\mathcal{U}$ . We will show that (EC.1) holds after adding  $R$ .

We first consider the case when  $R$  is a single-customer route visiting only one customer, i.e.,  $\ell = 1$  and  $R = (d, u_1, d)$ . If  $u_1 \in S$ , both the left-hand side and the right-hand side of (EC.1) increase by one while neither of the two sides changes if  $u_1 \notin S$ .

Next, assume  $\ell \geq 2$  and let  $(V', E')$  be the subgraph induced by intersection of edges from  $S$  and  $R$ , i.e.,  $V' = S \cap \{u_1, u_2, \dots, u_\ell\}$  and  $E' = E(S) \cap \{\{u_i, u_{i+1}\} \mid 1 \leq i < \ell\}$ . As depot  $d \in R$  is considered in at most one leg of (EC.1), adding route  $R$  can increase its left-hand side by at most  $1 + |E'|$  while its right-hand side is increased by  $|V'|$ . The theorem follows since  $1 + |E'| \leq |V'|$  holds as  $R$  is a route and  $(V', E')$  is therefore acyclic.  $\square$

Lemma EC.1 derives a condition under which (10) are redundant that is useful for separation routines and also used in the proof of Theorem 4.

LEMMA EC.1. *Multi-leg PE constraints (10) are redundant if the subgraph induced by  $\bar{x}(E(S))$  is not connected.*

*Proof* Consider an arbitrary candidate solution and a set  $S \subseteq C$  for which the subgraph induced by  $\bar{x}(E(S))$  contains two (disconnected) node sets  $S' \subset S$ ,  $\emptyset \neq S' \neq S$ , and  $T = S \setminus S'$ , i.e., for which  $\bar{x}(S', T) = 0$ . Let  $\bigcup_{j=1}^k \delta(i_j, I_j)$  be the legs of an arbitrary multi-leg inequality and assume that  $\mathcal{I} = \{i_1, i_2, \dots, i_k\} \cap S'$  and  $\mathcal{I}' = \{i_1, i_2, \dots, i_k\} \setminus \mathcal{I} \subseteq T$ . Note that the definition of set  $\mathcal{I}'$  includes the empty set and that multi-leg inequalities are valid (but redundant) for the case of zero legs (i.e., when  $k = 0$ ). The theorem follows since the multi-leg PE inequality

$$\sum_{j=1}^k \bar{x}(\delta(i_j, I_j)) + \bar{y}(S) + \bar{x}(E(S)) \leq \bar{z}(S)$$

is obtained as the sum of the two multi-leg PE constraints

$$\begin{aligned} \sum_{j:i_j \in \mathcal{I}} \bar{x}(\delta(i_j, I_j)) + \bar{y}(S') + \bar{x}(E(S')) &\leq \bar{z}(S') \\ \sum_{j:i_j \in \mathcal{I}'} \bar{x}(\delta(i_j, I_j)) + \bar{y}(T) + \bar{x}(E(T)) &\leq \bar{z}(T) \end{aligned}$$

for  $S'$  and  $T$ . This holds true since  $S = S' \cup T$ ,  $S' \cap T = \emptyset$ , ensures that  $\bar{y}(S) = \bar{y}(S') + \bar{y}(T)$ ,  $\bar{z}(S) = \bar{z}(S') + \bar{z}(T)$  while  $\bar{x}(S', T) = 0$  implies that  $\bar{x}(E(S)) = \bar{x}(E(S')) + \bar{x}(E(T))$ .  $\square$

THEOREM 4 *Consider formulation (1) when generic depot-consistency constraints (1g) are replaced by the subset of multi-leg PE constraints (10) for  $k = 2$ . There exist solutions to this formulation that violate at least one multi-leg PE constraint (10) for  $k \geq 3$ .*

*Proof.* Consider an instance with depots  $D = \{1, 2, 3\}$  and customer nodes  $C = \{4, 5, \dots, 11\}$  and the candidate solution to that instance corresponding to the graph given in Figure EC.1. A solid edge between two nodes  $u$  and  $v$  indicates  $\bar{x}_{uv} = 1$  and we assume the vehicle capacity is not restricting. Clearly, this graph does not represent a feasible solution to the MDSDVRP since the vehicle(s) traversing edges  $\{1, 9\}$  and  $\{2, 8\}$  cannot return to their initial depot without visiting other depots. We also observe that all nodes have even degree and that the subgraph induced by the customer nodes  $C$  is acyclic. Thus, only depot-consistency constraints may be violated.

Indeed, a multi-leg PE inequality (10) is violated for  $k = 3$ ,  $I_1 = \{1\}$ ,  $I_2 = \{2\}$ ,  $I_3 = \{3\}$ ,  $i_1 = 9$ ,  $i_2 = 8$ ,  $i_3 = 10$ , and  $S = \{8, 9, 10\}$ , since its left-hand side is equal to five while its right-hand side is equal to four. Observe that no customer node is adjacent to two depots in Figure EC.1. Thus, for  $k = 1$  all multi-leg PE inequalities are satisfied and  $\ell := \sum_{j=1}^k \bar{x}(\delta(i_j, I_j)) \leq 2$  if  $k \leq 2$ . Using Lemma EC.1 and  $\bar{y}_i = 0$ ,  $\forall i \in C$ , we conclude that  $\ell + |S| - 1 > \bar{z}(S)$  and therefore  $\bar{z}(S) \leq |S|$  must hold for set  $S \subseteq C$  if a multi-leg PE inequality would be violated. Each connected subgraph

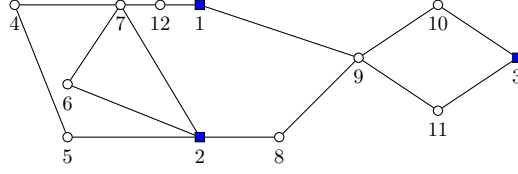

**Figure EC.1** A candidate solution which is infeasible for the MDS DVRP which violates multi-leg PE constraints (10), but satisfies those considering at most two legs.

consisting of customer nodes in Figure EC.1 that has edges to at least two depots does, however, contain a customer node that is visited twice (i.e., node 7 or 9). Thus,  $\bar{z}(S) \geq |S| + 1$  for each relevant customer subset  $S$  and the theorem follows.  $\square$

**THEOREM 5** Consider formulation (1) when generic depot-consistency constraints are replaced by multi-leg PE constraints (10). There exist solutions to this formulation that are infeasible for the MDS DVRP even if the capacity restrictions of all vehicles are met.

*Proof.* Consider an instance with depots  $D = \{1, 2\}$  and customers  $C = \{3, 4, \dots, 10\}$  and the candidate solution to that instance corresponding to the graph given in Figure 3. A solid edge between nodes  $u$  and  $v$  indicates  $\bar{x}_{uv} = 1$  and we assume that the vehicle capacity is not restricting. We observe that all node degrees are even and the subgraph induced by the customers  $C$  is acyclic. All constraints of (1) except depot-consistency inequalities are thus satisfied. It can be easily seen that the graph from Figure 3 does not represent a feasible solution to the MDS DVRP since, e.g., the vehicle traversing edge  $\{1, 3\}$  cannot return to depot 1 without visiting depot 2. Also observe that each connected subgraph induced by a set  $S \subseteq C$  that is connected to both depots consists of exactly one node with degree four while all other nodes in  $S$  have degree two, i.e.,  $\bar{z}(S) = |S| + 1$ . Since  $|D| = 2$  and no edge is traversed multiple times the left-hand side value of a PE constraint cannot be larger than  $|S| + 1$ . Therefore, all multi-leg PE constraints are satisfied.  $\square$

#### EC.1.4. Proofs of Section 5.2 (path-forcing based constraints)

**THEOREM 6** Multi-leg PF constraints (12) are valid for the MDS DVRP.

*Proof.* Consider an arbitrary solution of the MDS DVRP and let  $S \subseteq C$ ,  $i_j \in S$ ,  $D' = \cup_{j=1}^k I_j$ ,  $I_j \cap I_l = \emptyset$ ,  $1 \leq j \neq l \leq k$ , as defined in the multi-leg PF constraints (12). Assume that  $\sum_{j=1}^k \bar{x}(i_j, I_j) = \ell$ ,  $\ell \in \mathbb{N}_0$ , and recall that (with the exception of single-customer routes) each route traverses each edge at most once. Since each depot is contained in at most one set  $I_j$ ,  $1 \leq j \leq k$ , these  $\ell$  edge traversals correspond to  $\ell$  different routes. Each such route enters  $S$  by an edge  $\{d, i_j\}$ ,  $d \in I_j$ , and leaves  $S$  via an edge  $\{u, v\}$  with  $u \in S$ , and  $v \in (C \cup \{d\}) \setminus S$ . If  $v = d$ , we have  $u \neq i_j$  since each edge is traversed only once by each route. Edge  $\{u, v\}$  is not contained in one of the legs considered on

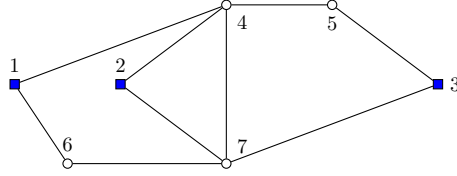

**Figure EC.2** A candidate solution which is infeasible for the MDS DVRP that violates multi-leg PF constraints (12), but does not violate PF constraints (11).

the left-hand side of (12) since depot  $d$  is contained in set  $I_j$  and thus in leg  $\delta(i_j, I_j)$ . Considering all  $\ell$  relevant tours, it follows that

$$\bar{x}(\delta(S, C \setminus S)) + \bar{x}(\delta(S, D')) - \sum_{j=1}^k \bar{x}(\delta(i_j, I_j)) \geq \ell.$$

Thus, we have

$$\bar{x}(\delta(S, (C \cup D') \setminus S)) - \sum_{j=1}^k \bar{x}(\delta(i_j, I_j)) \geq \sum_{j=1}^k \bar{x}(\delta(i_j, I_j))$$

which is equivalent to (12) for the considered solution.  $\square$

**THEOREM 7** Consider formulation (1) when generic depot-consistency constraints (1g) are replaced by PF constraints (11). There exist solutions to this formulation that violate at least one multi-leg PF constraint (12).

*Proof.* Consider an instance with depots  $D = \{1, 2, 3\}$  and customer nodes  $C = \{4, 5, 6, 7\}$  and the candidate solution to that instance corresponding to the graph given in Figure EC.2. A solid edge between nodes  $u$  and  $v$  indicates  $\bar{x}_{uv} = 1$  and we assume that the vehicle capacity is not restricting. As all node-degrees are even and the subgraph induced by the customer nodes  $C$  is acyclic, only depot-consistency inequalities may be violated. Observe that (single-leg) PF constraints (11) are not violated since each depot-edge  $\{d, i\} \in E_D$ ,  $d \in D$ , part of this solution is contained in a cycle starting and ending at the same depot and not passing through any other depot. PF constraints (11) do, however, not ensure that these cycles are edge disjoint. Indeed, the candidate solution is infeasible for the MDS DVRP since the edge  $\{4, 7\}$  is contained in all such cycles. It also violates a multi-leg PF inequality (12) for  $S = \{4, 5\}$ ,  $D' = \{1, 2, 3\}$  and  $k = 2$  with  $I_1 = \{1, 2\}$ ,  $I_2 = \{3\}$ ,  $i_1 = 4$ ,  $i_2 = 7$ .  $\square$

**THEOREM 8** Multi-leg PF constraints (12) imply multi-leg PE constraints (10).

*Proof.* We first observe that each multi-leg PF inequality (12) can be rewritten as

$$2 \sum_{j=1}^k x(\delta(i_j, I_j)) \leq x(\delta(S)) - x(\delta(S, D \setminus D'))$$

since  $x(\delta(S, (C \cup D') \setminus S)) = x(\delta(S)) - x(\delta(S, D \setminus D'))$ . Using  $x(\delta(S)) = 2z(S) - 2y(S) - 2x(E(S))$  which is obtained by summing up the degree equations (1b) for all customers  $i \in S$ , it follows that

$$2 \sum_{j=1}^k x(\delta(i_j, I_j)) + x(\delta(S, D \setminus D')) \leq 2z(S) - 2x(E(S)) - 2y(S).$$

Rearranging the terms and dividing by two, we obtain

$$\sum_{j=1}^k x(\delta(i_j, I_j)) + 0.5x(\delta(S, D \setminus D')) + x(E(S)) + y(S) \leq z(S) \quad (\text{EC.2})$$

which shows that multi-leg PF constraints (12) correspond to lifted versions of multi-leg PE constraints (10) with an additional term  $0.5x(\delta(S, D \setminus D'))$  on the left-hand side. This result also implies that there is a one-to-one correspondence between multi-leg PE constraints (10) and the subset of multi-leg PF constraints with  $D' = D$ .  $\square$

Lemma EC.2 shows that we can focus on sets  $S \subseteq C$  for which the subgraph induced by  $\bar{x}(E(S))$  is connected when trying to identify violated constraints (12). This result will be used in the proofs of Lemma EC.3 and Theorem 9.

**LEMMA EC.2.** *Multi-leg PF constraints (12) are redundant if the subgraph induced by  $\bar{x}(E(S))$  is not connected.*

*Proof* Consider an arbitrary candidate solution and a set  $S \subseteq C$  for which the subgraph induced by  $\bar{x}(E(S))$  contains two (disconnected) sets  $S_1 \subset S$ ,  $\emptyset \neq S_1 \neq S$ , and  $S_2 = S \setminus S_1$ . Let  $\bigcup_{j=1}^k \delta(i_j, I_j)$  be the legs of an arbitrary multi-leg PF constraint for set  $S$  and assume that there exists  $\ell$ ,  $1 \leq \ell < k$  such that  $\{i_1, i_2, \dots, i_\ell\} \subseteq S_1$  and  $\{i_{\ell+1}, \dots, i_k\} \subseteq S_2$ . Consider the two multi-leg PF inequalities

$$2 \sum_{j=1}^{\ell} \bar{x}(\delta(i_j, I_j)) \leq \bar{x}(\delta(S_1, (C \cup D_1) \setminus S_1)) \quad (\text{EC.3})$$

$$2 \sum_{j=\ell+1}^k \bar{x}(\delta(i_j, I_j)) \leq \bar{x}(\delta(S_2, (C \cup D_2) \setminus S_2)) \quad (\text{EC.4})$$

for  $S_1$  and  $S_2$  where  $D_1 = \bigcup_{j=1}^{\ell} I_j$  and  $D_2 = \bigcup_{j=\ell+1}^k I_j$  denote the subsets of depots assigned to nodes in  $S_1$  and  $S_2$ , respectively. Summing up the latter two inequalities, we obtain

$$2 \sum_{j=1}^k \bar{x}(\delta(i_j, I_j)) \leq \bar{x}(\delta(S_1, (C \cup D_1) \setminus S_1)) + \bar{x}(\delta(S_2, (C \cup D_2) \setminus S_2)). \quad (\text{EC.5})$$

We also observe that the relations

$$\begin{aligned} \bar{x}(\delta(S_1, (C \cup D_1) \setminus S_1)) &= \bar{x}(\delta(S_1, (C \cup D_1) \setminus (S_1 \cup S_2))) = \bar{x}(\delta(S_1, (C \cup D_1) \setminus S)) \leq \bar{x}(\delta(S_1, (C \cup D) \setminus S)) \\ \bar{x}(\delta(S_2, (C \cup D_2) \setminus S_2)) &= \bar{x}(\delta(S_2, (C \cup D_2) \setminus (S_1 \cup S_2))) = \bar{x}(\delta(S_2, (C \cup D_2) \setminus S)) \leq \bar{x}(\delta(S_2, (C \cup D) \setminus S)) \end{aligned}$$

hold since  $\bar{x}(\delta(S_1, S_2)) = 0$ ,  $D_1 \subseteq D'$  and  $D_2 \subseteq D'$ . Using above inequalities in (EC.5), we obtain

$$\begin{aligned} 2 \sum_{j=1}^k \bar{x}(\delta(i_j, I_j)) &\leq \bar{x}(\delta(S_1, (C \cup D_1) \setminus S_1)) + \bar{x}(\delta(S_2, (C \cup D_2) \setminus S_2)) \\ &\leq \bar{x}(\delta(S_1, (C \cup D) \setminus S)) + \bar{x}(\delta(S_2, (C \cup D) \setminus S)) = \bar{x}(\delta(S, (C \cup D) \setminus S)) \end{aligned}$$

which shows that the multi-leg PF inequality for set  $S$  is implied by the two inequalities for sets  $S_1$  and  $S_2$ . Finally, we note that if  $\ell = k$  (which is the case excluded above), the multi-leg PF constraint (EC.3) for set  $S_1$  implies the one for  $S$  since  $\bar{x}(\delta(S_1, (C \cup D_1) \setminus S_1)) \leq \bar{x}(\delta(S_1, (C \cup D) \setminus S)) \leq \bar{x}(\delta(S, (C \cup D) \setminus S))$ .  $\square$

The following lemma will be used in the proof of Theorem 9.

LEMMA EC.3. *Consider formulation (1) with generic depot-consistency constraints (1g) replaced by multi-leg PF constraints (12). Assume that a candidate solution contains two customer nodes  $i$  and  $j$  such that  $\bar{x}_{ij} = 1$ ,  $\bar{z}_i = 1$ ,  $\bar{z}_j \geq 2$  and which are both connected to a depot  $d \in D$  by an edge traversed exactly once (i.e.,  $\bar{x}_{di} = 1$  and  $\bar{x}_{dj} = 1$ ). If the considered candidate solution violates a multi-leg PF constraint (12) with  $i \in S$ , then it also violates one for set  $S' = S \setminus \{i\}$ .*

*Proof* Consider nodes  $i \in C$ ,  $j \in C$ , and  $d \in D$ , satisfying the conditions in the lemma. Since the inequality (12) for  $S = \{i\}$  is not violated,  $i \in S$  implies that  $j \in S$  (due to Lemma EC.2). If edge  $\{d, i\}$  is not part of the legs considered on the left-hand side of the multi-leg PF inequality, both the left-hand side and the right-hand side value remains identical when removing node  $i$  from  $S$ , i.e., considering  $S' = S \setminus \{i\}$ . Similarly, if edge  $\{d, i\}$  is contained in one leg of the multi-leg PF inequality, we can instead consider a leg containing edge  $\{d, j\}$  which leaves the left-hand side value unchanged and then remove node  $i$  from set  $S$  as in the first case.  $\square$

THEOREM 9 *Consider formulation (1) with generic depot-consistency constraints replaced by multi-leg PF constraints (12). There exist solutions to this formulation that are infeasible for the MDSDVRP and which do not violate the capacity restrictions of any vehicle.*

*Proof.* Consider the candidate solution given in Figure 2b. As discussed in Section 2, this candidate solution is not feasible for the MDSDVRP and may only violate depot-consistency constraints. It therefore remains to show that no multi-leg PF constraint (12) is violated. To simplify our arguments, we first observe that due to Lemma EC.3 we do not need to consider inequalities for which set  $S$  contains a customer node in  $\{4, 9, 10, 11, 12, 14\}$ . Thus, we assume without loss of generality that  $S \subseteq S' = \{5, 6, 7, 8, 13\}$  and that subgraph induced by  $\bar{x}(E(S))$  is connected, cf. Lemma EC.2.

We first observe that all multi-leg PF constraints (12) with  $k = 1$  and  $|D'| = 1$  are satisfied. They correspond to PF constraints (11) which are satisfied since there exists a route starting and ending at depot  $d \in D$  that does not visit any other depots for each depot edge  $e = \{d, i\} \in E_D$  with  $\bar{x}_e = 1$ .

Next, we discuss the case when set  $S$  contains only one customer node, i.e.,  $S = \{i\}$ ,  $i \in S'$ . Here, we focus on customer nodes  $i \in \{6, 7, 8\}$  for which  $\bar{x}(\delta_D(i)) = 2$  and assume that  $|D'| = 2$  since customers with one adjacent depot are covered by the previous case and customers adjacent to more than two depots do not exist. Thus, the left-hand side of each relevant multi-leg PF constraint is equal to four. Since  $\bar{x}(\delta(\{i\}, C \setminus \{i\})) \geq 2$  for each  $i \in \{6, 7, 8\}$  and the two depot edges considered on the left-hand side are also contained in the cut  $\bar{x}(\delta(\{i\}, (C \cup D') \setminus \{i\}))$ , the right-hand side of each such inequality is at least four. Thus, all multi-leg PF constraints with  $|S| = 1$  are satisfied.

We now turn our attention to the case  $|D'| = 2$  and  $S \subseteq S'$  such that  $|S| \geq 2$  and the subgraph induced by  $\bar{x}(E(S))$  is connected. We assume w.l.o.g. that set  $S$  contains nodes  $i_1$  and  $i_2$  (which may be identical) incident to two depot-edges  $\{d_1, i_1\}$  and  $\{d_2, i_2\}$  which are considered on the left-hand side of (12). We will show that no multi-leg PF constraint can be violated in this case since  $\bar{x}(\delta(S, C \setminus S)) \geq 2$  and thus  $\bar{x}(\delta(S, (C \cup D') \setminus S)) \geq 4$  holds (because of the two depot edges  $\{d_1, i_1\}$  and  $\{d_2, i_2\}$ ) for all relevant sets  $S$ . Observe, that  $8 \notin S$ , since  $8 \in S$  would imply that  $\{\{8, 10\}, \{8, 11\}\} \subseteq \delta(S, C \setminus S)$ . Next, assume that  $5 \in S$  for which we discuss two subcases based on the above assumptions of connectivity and  $|S| \geq 2$ . Node 7 cannot be in  $S$  too since  $\{5, 7\} \subseteq S$  implies that  $\{\{4, 5\}, \{7, 12\}\} \subseteq \delta(S, C \setminus S)$ . Node 6 cannot be in  $S$  either since  $\{5, 6\} \subseteq S$  and  $8 \notin S$  (due to the previous result) implies that  $\{\{4, 5\}, \{6, 8\}\} \subseteq \delta(S, C \setminus S)$ . We conclude that  $S \cap \{5, 8\} = \emptyset$  and thus  $S \subseteq \{6, 7, 13\}$  which does not contain a connected set of at least two nodes and therefore contradicts the assumptions made in this case.

It remains to show that all multi-leg PF constraints considering all three depots (i.e.,  $D' = \{1, 2, 3\}$ ,  $\sum_{j=1}^k \bar{x}(\delta(i_j, I_j)) = 3$ ) with  $|S| \geq 2$  such that the subgraph induced by  $\bar{x}(E(S))$  is connected are satisfied. Here, we observe that the right-hand side of each associated inequality (12) simplifies to  $\bar{x}(\delta(S, V \setminus S))$  and that such an inequality is violated if  $\bar{x}(\delta(S, V \setminus S)) \leq 5$ . Furthermore,  $\{7, 13\} \cap S \neq \emptyset$  as depot 3 is connected only to nodes 7 and 13. Node 13 cannot be in set  $S$  of a violated multi-leg PF inequality since  $13 \in S$  implies  $\{8, 13\} \subseteq S$  (since  $|S| \geq 2$ ) and thus  $\bar{x}(\delta(S, V \setminus S)) \geq \bar{x}(\delta(\{13, 8\}, V \setminus S)) \geq 7 > 5$  for any  $S \in S'$  such that  $\{8, 13\} \subseteq S$ . Thus, assume that  $7 \in S$  and observe that  $\bar{x}(\delta(S, V \setminus S)) = 6$  if  $S = \{5, 7\}$ . Further adding node 6 (i.e.,  $\{5, 6, 7\} \subseteq S$ ), we have  $\bar{x}(\delta(S, V \setminus S)) \geq \bar{x}(\delta(\{5, 6, 7\}, V \setminus S)) \geq 7 > 5$  for any such  $S \in S'$ . The theorem follows since  $S \cap \{7, 13\} = \emptyset$  which implies that no violated multi-leg PF inequalities can exist in case  $D' = 3$ .  $\square$

## EC.2. Separation of valid inequalities

### EC.2.1. Exact separation of $y$ CAPs (9)

We first observe that for each set  $S \subset C$  the cut form

$$x(\delta(S)) + 2y(S) \geq \frac{2}{Q} \left( q(S) + \sum_{i \in S: q_i < Q} (Q - q_i) \cdot y_i \right)$$

of (9) is obtained using the degree constraints (1b) of all customers  $i \in S$ . Multiplying this inequality with  $Q/2$  and re-arranging the terms, we obtain

$$q(C \setminus S) + \sum_{i \in C \setminus S: q_i < Q} (Q - q_i) \cdot y_i + \frac{Q}{2} x(\delta(S)) + Qy(S) \geq q(C) + \sum_{i \in C: q_i < Q} (Q - q_i) \cdot y_i \quad (\text{EC.6})$$

which suggests the following, cut-based separation of  $y$ CAPs based on a directed support graph with node set  $V \cup \{s, t\}$  where  $s$  is the source and  $t$  is the target node. For each depot  $d \in D$ , arc  $(s, d)$  is included with infinite capacity to ensure that all depots are outside set  $S$ . For each customer  $i \in C$ , arc  $(i, t)$  is added that has capacity  $q_i + (Q - q_i) \cdot \bar{y}_i$  if  $q_i < Q$  and capacity  $q_i$  otherwise. These arcs account for the first two terms on the left-hand side of (EC.6) for customers outside of  $S$ . Depot edges  $e = \{d, i\} \in \bar{E}_D$ ,  $d \in D$ ,  $i \in C$ , are represented by arcs  $(d, i)$  with capacity  $\frac{Q}{2} \bar{x}_e + Q\bar{y}_i$  if  $d$  is the depot from which single-customer routes to  $i$  are performed and with capacity  $\frac{Q}{2} \bar{x}_e$  otherwise. Finally, we include arcs  $(i, j)$  and  $(j, i)$  with capacity  $\frac{Q}{2} \bar{x}_e$  for each customer edge  $e = \{i, j\} \in \bar{E}_C$ . Together with aforementioned depot arcs, they account for the last two terms on the left-hand side of (EC.6). A minimum cut from  $s$  to  $t$  in this graph corresponds to a violated  $y$ CAP if its capacity is less than the right-hand side of (EC.6).

### EC.2.2. Exact separation of rounded capacity cuts (8)

Formulation (EC.7), inspired by Martinelli et al. (2013), is used for the exact separation of rounded capacity cuts (8). Variables  $s_i \in \{0, 1\}$ ,  $i \in C$ , indicate customers in  $S$ , variables  $h_e \in \{0, 1\}$ ,  $e \in \bar{E}_C$ , indicate edges within set  $S$ , variables  $\kappa \in \{0, \dots, K\}$ , indicate the number of vehicles needed to serve  $S$ , and variable  $\rho \in \{0, \dots, Q - 1\}$  indicates the total residual vehicle capacity.

$$\max \sum_{e \in \bar{E}} \bar{x}_e h_e - \sum_{j \in C} \bar{z}_j s_j + \kappa \quad (\text{EC.7a})$$

$$\text{s.t. } h_e \leq s_i \quad \forall i \in C, \forall e = \{i, j\} \in \bar{E}_C \quad (\text{EC.7b})$$

$$\sum_{i \in C} q_i s_i + \rho = Q\kappa \quad (\text{EC.7c})$$

$$s(C) \geq 2 \quad (\text{EC.7d})$$

All solutions with an objective value larger than zero correspond to a violated cut since the objective function (EC.7a) maximizes the violation of an inequality (8). The associated set  $S$  is defined by all nodes  $i \in C$  such that  $\bar{s}_i = 1$ . Constraints (EC.7b) guarantee that edge  $\{i, j\} \in \bar{E}_C$  can only be in  $E(S)$  if both incident nodes are in  $S$ . Equation (EC.7c) links the demand of all nodes in  $S$  to the number of vehicles required to serve them and inequality (EC.7d) makes sure that set  $S$  contains at least two nodes since the case when  $|S| = 1$  is covered by (1k).

Even though the MIP is quite sparse, for large instances the runtime can be long. All solutions found by the MIP with an objective value greater than zero are sorted according to their objective

value (non-increasing) and considered in an iterative manner. The capacity cut corresponding to each considered solution is added if its node set  $S$  is disjoint to those of all such cuts already added for the current candidate solution. Subsequently, we iterate re-solving the MIP while forcing  $s_i = 0$  for all customers  $i$  already contained in set  $S$  of an already added inequality until no more violated cuts are found. For each identified set  $S$ , we also check whether a corresponding  $y$ CAP constraint (9) is violated in which case we add this constraint, too.

### EC.2.3. Separation of multi-leg depot-consistency constraints (10) and (12)

Formulation (EC.8) used for the exact separation of multi-leg PF constraints (12) is based on their subtour form (EC.2). As we detail below, it is also used to separate multi-leg PE constraints (10) after small modifications. Binary variables  $s_i$ ,  $i \in C$ , indicate customers in set  $S$ ,  $h_e$ ,  $e \in \bar{E}_C$ , edges within set  $S$ , binary variables  $l_e$ ,  $e \in \bar{E}_D$ , indicate edges included in a leg, binary variables  $f_e$ ,  $e \in \bar{E}_D$ , indicate depot edges connecting a depot in  $D \setminus D'$  and a customer in  $S$ , and binary variables  $t_d$ ,  $d \in D$ , indicate depots in  $D \setminus D'$ .

$$\max \sum_{e \in \bar{E}_D} (\bar{x}_e l_e + 0.5 \bar{x}_e f_e) + \sum_{e \in \bar{E}_C} \bar{x}_e h_e + \sum_{j \in C} (\bar{y}_j - \bar{z}_j) s_j \quad (\text{EC.8a})$$

$$h_e \leq s_i \quad \forall i \in C, \forall \{i, j\} \in \bar{E}_C \quad (\text{EC.8b})$$

$$l_e \leq s_j \quad \forall e = \{d, j\} \in \bar{E}_D \quad (\text{EC.8c})$$

$$t_d + l(\delta(d)) \leq 1 \quad \forall d \in D \quad (\text{EC.8d})$$

$$f_e \leq t_d \quad \forall e = \{d, j\} \in \bar{E}_D, d \in D \quad (\text{EC.8e})$$

$$f_e \leq s_j \quad \forall e = \{d, j\} \in \bar{E}_D, j \in C \quad (\text{EC.8f})$$

$$s(C) \geq 2 \quad (\text{EC.8g})$$

All solutions with an objective value larger than zero correspond to a violated cut since the objective function (EC.8a) maximizes the violation of an inequality (12). Constraints (EC.8b) guarantee that edge  $\{i, j\} \in \bar{E}_C$  can only be in  $E(S)$  if both incident nodes are in  $S$ . Similarly, inequalities (EC.8c) make sure that customer  $j$  is in  $S$  whenever  $\{d, j\} \in \bar{E}_D$  is contained in a leg. Constraints (EC.8d) state that each depot is either contained in exactly one leg or in  $D \setminus D'$  while (EC.8e) and (EC.8f) are forcing constraints ensuring that depot edges not part of a leg (but counting with a factor of 0.5 in the objective function) are incident to a depot in  $D \setminus D'$  and a customer in  $S$ . Finally, inequality (EC.8g) make sure that set  $S$  contains at least two nodes since multi-leg PF constraints with  $|S| = 1$  are equivalent to constraints (3).

As shown in the proof of Theorem 8, multi-leg PE constraints (10) are a special case of multi-leg PF constraints in which  $D' = D$ . Thus, the variant of formulation (EC.8) obtained by removing variables  $t_d$ ,  $d \in D$ , and  $f_e$ ,  $e \in \bar{E}_D$ , is used to separate inequalities (10).

**Table EC.1** LP gaps [%] of MDS DVRP instances (set `mdsd40`) for capacity and depot-consistency constraints.

| instance | $ D $ | $D_R$  | R    | RY   | RYE2 | RYE  | RYF1 | RYF  |
|----------|-------|--------|------|------|------|------|------|------|
| mdsd40-1 | 2     | [1,,9] | 2.34 | 1.94 | 1.90 | 1.90 | 1.94 | 1.90 |
|          |       | [3,,7] | 3.74 | 3.01 | 3.00 | 3.00 | 3.01 | 3.00 |
|          |       | [7,,9] | 1.86 | 0.75 | 0.70 | 0.70 | 0.75 | 0.70 |
|          | 4     | [1,,9] | 3.92 | 3.02 | 2.68 | 2.66 | 2.95 | 2.65 |
|          |       | [3,,7] | 3.95 | 2.91 | 2.81 | 2.80 | 2.91 | 2.79 |
|          |       | [7,,9] | 2.13 | 0.69 | 0.59 | 0.59 | 0.66 | 0.58 |
|          | 6     | [1,,9] | 2.66 | 2.32 | 2.17 | 2.09 | 2.31 | 2.07 |
|          |       | [3,,7] | 4.90 | 3.94 | 3.81 | 3.81 | 3.93 | 3.80 |
|          |       | [7,,9] | 1.33 | 0.31 | 0.06 | 0.05 | 0.08 | 0.05 |
| mdsd40-2 | 2     | [1,,9] | 1.99 | 1.14 | 1.08 | 1.08 | 1.14 | 1.08 |
|          |       | [3,,7] | 4.28 | 3.55 | 3.46 | 3.46 | 3.55 | 3.46 |
|          |       | [7,,9] | 1.75 | 0.71 | 0.65 | 0.65 | 0.69 | 0.65 |
|          | 4     | [1,,9] | 2.69 | 2.08 | 2.01 | 2.01 | 2.08 | 2.01 |
|          |       | [3,,7] | 5.64 | 4.34 | 4.12 | 4.12 | 4.34 | 4.12 |
|          |       | [7,,9] | 1.41 | 0.29 | 0.24 | 0.23 | 0.25 | 0.23 |
|          | 6     | [1,,9] | 4.41 | 3.95 | 3.45 | 3.37 | 3.69 | 3.37 |
|          |       | [3,,7] | 6.27 | 5.03 | 4.58 | 4.47 | 4.92 | 4.46 |
|          |       | [7,,9] | 1.42 | 0.45 | 0.32 | 0.31 | 0.37 | 0.31 |
| mdsd40-6 | 2     | [1,,9] | 4.40 | 3.58 | 3.58 | 3.58 | 3.58 | 3.58 |
|          |       | [3,,7] | 3.97 | 2.97 | 2.97 | 2.97 | 2.97 | 2.97 |
|          |       | [7,,9] | 2.65 | 1.06 | 1.05 | 1.05 | 1.06 | 1.05 |
|          | 4     | [1,,9] | 4.34 | 3.58 | 3.56 | 3.54 | 3.58 | 3.54 |
|          |       | [3,,7] | 4.48 | 3.01 | 2.88 | 2.83 | 3.01 | 2.83 |
|          |       | [7,,9] | 1.71 | 0.92 | 0.42 | 0.42 | 0.60 | 0.42 |
|          | 6     | [1,,9] | 4.40 | 3.55 | 3.47 | 3.46 | 3.54 | 3.44 |
|          |       | [3,,7] | 3.52 | 2.52 | 1.87 | 1.78 | 2.32 | 1.74 |
|          |       | [7,,9] | 0.60 | 0.41 | 0.20 | 0.20 | 0.22 | 0.20 |

### EC.3. Computational results for the MDS DVRP

This section contains computational results for the MDS DVRP that accompany the figures and discussion in the article.

Table EC.1 details LP-relaxation gaps [%] of formulation (1) when including different sets of capacity and depot-consistency inequalities. Notation **R** indicates that a variant includes rounded capacity-cuts (8), **Y** indicates inclusion of  $y$ CAPs (9), **E2** of two-leg PE constraints, **E** of multi-leg PE constraints (10), **F1** of (single-leg) PF constraints (11), and **F** of multi-leg PF constraints (12).

Table EC.2 compares different configurations of the B&C algorithm on MDS DVRP instance set `mdsd40`. Their abbreviations indicate whether they consider rounded capacity cuts (**R**),  $y$ CAPs (**Y**), (multi-leg) PE constraints (**E**), (multi-leg) PF constraints (**F**), or all depot-consistency constraints (**D**). The lifting detailed in Section 6.2 is applied for all variants including depot-consistency constraints. In addition to solution times (**time**) or optimality gaps (**gap**) [%] after two hours, the table also reports numbers of candidate solutions identified by the feasibility check that violate capacity (**# capacity infeasible**) or depot-consistency (**# depot infeasible**) constraints.

### EC.4. Computational results for the MDTSP

This section contains detailed computational results for the MDTSP that accompany the figures and discussion in the article. Table EC.3 details LP-relaxation gaps [%] of formulation (1) when including different sets of depot-consistency inequalities. Notation **B** indicates that a variant

**Table EC.2 Comparison of B&C configurations for the MDS DVRP on instance set mdsd40 with  $|C| = 40$ .**

| instance | $ D $    | $D_R$  | time (gap) |             |              |              | # capacity infeasible |           |      |      | # depot infeasible |      |      |      |      |   |
|----------|----------|--------|------------|-------------|--------------|--------------|-----------------------|-----------|------|------|--------------------|------|------|------|------|---|
|          |          |        | RY         | RYE         | RYF          | RYD          | RY                    | RYE       | RYF  | RYD  | RY                 | RYE  | RYF  | RYD  |      |   |
| mdsd40-1 | 2        | [1.,9] | (0.1)      | 218         | 176          | <b>158</b>   | 0                     | 1         | 0    | 0    | 11017              | 0    | 0    | 0    |      |   |
|          |          | [3.,7] | (0.4)      | 650         | 618          | <b>534</b>   | 0                     | 0         | 0    | 0    | 7057               | 42   | 7    | 0    |      |   |
|          |          | [7.,9] |            | 159         | 158          | 210          | <b>117</b>            | 0         | 0    | 1    | 0                  | 5    | 0    | 0    | 0    |   |
|          | 4        | [1.,9] | (1.0)      | 2516        | 816          | <b>794</b>   | 0                     | 0         | 0    | 0    | 4266               | 0    | 0    | 0    |      |   |
|          |          | [3.,7] |            | 367         | <b>171</b>   | 176          | 173                   | 0         | 0    | 0    | 0                  | 131  | 0    | 0    | 0    |   |
|          |          | [7.,9] |            | 138         | 52           | <b>31</b>    | 57                    | 0         | 2    | 0    | 0                  | 327  | 0    | 0    | 0    |   |
|          | 6        | [1.,9] | (0.5)      | 275         | 204          | <b>193</b>   | 0                     | 0         | 0    | 0    | 3778               | 0    | 0    | 0    |      |   |
|          |          | [3.,7] | (0.8)      | <b>449</b>  | 525          | 461          | 0                     | 0         | 0    | 0    | 3769               | 0    | 0    | 0    |      |   |
|          |          | [7.,9] |            | 74          | <b>10</b>    | 11           | <b>10</b>             | 0         | 0    | 0    | 0                  | 0    | 0    | 0    | 0    |   |
|          | mdsd40-2 | 2      | [1.,9]     |             | 78           | 82           | 79                    | <b>48</b> | 0    | 0    | 0                  | 0    | 0    | 0    | 0    | 0 |
|          |          |        | [3.,7]     | (0.4)       | 1159         | 987          | <b>735</b>            | 59        | 115  | 221  | 33                 | 6481 | 134  | 0    | 0    |   |
|          |          |        | [7.,9]     |             | 235          | 95           | 92                    | <b>90</b> | 0    | 0    | 0                  | 0    | 51   | 0    | 0    | 0 |
| 4        |          | [1.,9] |            | 72          | 66           | 100          | <b>63</b>             | 0         | 0    | 0    | 0                  | 4    | 0    | 0    | 0    |   |
|          |          | [3.,7] | (0.7)      | 1787        | <b>1720</b>  | 2095         | 0                     | 0         | 0    | 0    | 4452               | 0    | 0    | 0    |      |   |
|          |          | [7.,9] |            | <b>74</b>   | 219          | 173          | 183                   | 0         | 0    | 0    | 0                  | 0    | 0    | 0    | 0    |   |
| 6        |          | [1.,9] | (1.6)      | 292         | <b>261</b>   | 408          | 0                     | 0         | 0    | 0    | 4864               | 0    | 0    | 0    |      |   |
|          |          | [3.,7] | (2.5)      | (0.8)       | 6360         | <b>4933</b>  | 0                     | 0         | 0    | 0    | 4914               | 0    | 0    | 0    |      |   |
|          |          | [7.,9] |            | 71          | 55           | <b>36</b>    | 56                    | 0         | 0    | 0    | 0                  | 8    | 0    | 0    | 0    |   |
| mdsd40-6 |          | 2      | [1.,9]     | (1.6)       | (1.5)        | (1.4)        | <b>(0.7)</b>          | 102       | 150  | 477  | 480                | 4559 | 3160 | 2180 | 3105 |   |
|          |          |        | [3.,7]     | (1.7)       | <b>(0.6)</b> | <b>(0.6)</b> | <b>(0.6)</b>          | 21        | 138  | 189  | 265                | 5419 | 7723 | 6953 | 6554 |   |
|          |          |        | [7.,9]     | (0.0)       | <b>209</b>   | 287          | 317                   | 0         | 0    | 0    | 0                  | 5002 | 4    | 0    | 0    |   |
|          | 4        | [1.,9] | (1.8)      | 2386        | 2082         | <b>1801</b>  | 0                     | 302       | 304  | 317  | 4621               | 1127 | 0    | 0    |      |   |
|          |          | [3.,7] | (1.3)      | 1027        | <b>795</b>   | 1543         | 0                     | 0         | 0    | 3    | 4893               | 11   | 6    | 4    |      |   |
|          |          | [7.,9] | (0.6)      | 84          | 147          | <b>81</b>    | 0                     | 0         | 0    | 0    | 3273               | 0    | 0    | 0    |      |   |
|          | 6        | [1.,9] |            | 5983        | 414          | <b>409</b>   | 697                   | 723       | 690  | 696  | 790                | 6182 | 0    | 0    | 0    |   |
|          |          | [3.,7] |            | 671         | 114          | 129          | <b>111</b>            | 0         | 1    | 1    | 0                  | 1167 | 0    | 0    | 0    |   |
|          |          | [7.,9] |            | 203         | 40           | 57           | <b>31</b>             | 0         | 0    | 0    | 0                  | 83   | 0    | 0    | 0    |   |
|          | mdsd40-9 | 2      | [1.,9]     | (0.8)       | (1.0)        | (1.4)        | <b>(0.7)</b>          | 20        | 39   | 442  | 251                | 6893 | 6754 | 4025 | 5599 |   |
|          |          |        | [3.,7]     | (0.5)       | <b>(0.4)</b> | <b>(0.4)</b> | <b>(0.4)</b>          | 36        | 231  | 1152 | 1834               | 6780 | 6703 | 5478 | 5329 |   |
|          |          |        | [7.,9]     | (0.8)       | <b>(0.4)</b> | (0.5)        | <b>(0.4)</b>          | 14        | 127  | 16   | 78                 | 1884 | 3781 | 2715 | 4385 |   |
| 4        |          | [1.,9] | (1.3)      | (0.8)       | <b>(0.4)</b> | (0.5)        | <b>(0.4)</b>          | 8         | 22   | 1670 | 1600               | 4014 | 5822 | 5762 | 4028 |   |
|          |          | [3.,7] | (0.7)      | (0.5)       | <b>(0.2)</b> | <b>(0.2)</b> | 15                    | 256       | 3897 | 4786 | 7233               | 4633 | 198  | 71   |      |   |
|          |          | [7.,9] | (1.0)      | <b>2119</b> | 2833         | 2967         | 0                     | 0         | 0    | 0    | 3101               | 3925 | 3770 | 3759 |      |   |
| 6        |          | [1.,9] | (0.6)      | 101         | 85           | <b>63</b>    | 0                     | 0         | 0    | 0    | 7877               | 0    | 0    | 0    |      |   |
|          |          | [3.,7] | (1.3)      | 133         | <b>98</b>    | 151          | 1                     | 2         | 2    | 2    | 8676               | 0    | 0    | 0    |      |   |
|          |          | [7.,9] |            | 100         | <b>51</b>    | 70           | 61                    | 0         | 0    | 0    | 0                  | 382  | 0    | 0    | 0    |   |

includes no such constraints, E2 indicates inclusion of two-leg PE constraints, E of multi-leg PE constraints (10), F1 of (single-leg) PF constraints (11), and F of multi-leg PF constraints (12).

### EC.5. Computational results for the SDVRP

This section contains detailed computational results for the SDVRP that accompany the figures and discussion in the article. Tables EC.4 to EC.11 provide detailed results for SDVRP instances considered in the literature for the cases of a limited and unlimited fleet as well as with and without rounding up all costs to integer values. For the best performing B&C variant RY, the table reports obtained lower bounds (LB), upper bounds (UB), solutions times (time) or remaining gaps (gap) [%] after two hours, and numbers of cuts added for integer (# lazy cons) and fractional (# fract cuts) candidate solutions. The latter two categories are reported for symmetry breaking constraints (SY), subtour elimination constraints (SE),  $y$ CAPs (Y), rounded capacity constraints (R), and feasibility cuts (F). These tables also reports best known values (LB, UB, time) from the literature (BK) and objective values of the heuristic solutions (heur) used to initialize the B&C

**Table EC.3** LP gaps [%] of MDTSP instances for different depot-consistency constraints.

| type     | instance | B        | E2   | E    | F1   | F    |
|----------|----------|----------|------|------|------|------|
| BGS      | 100-10-1 | 1.61     | 1.48 | 1.07 | 0.92 | 0.92 |
|          | 100-10-2 | 0.85     | 0.80 | 0.36 | 0.35 | 0.35 |
|          | 100-10-3 | 3.86     | 3.81 | 3.68 | 3.66 | 3.66 |
|          | 100-20-1 | 1.62     | 1.37 | 0.98 | 0.89 | 0.89 |
|          | 100-20-2 | 2.45     | 2.24 | 1.75 | 1.65 | 1.65 |
|          | 100-20-3 | 4.05     | 3.60 | 3.10 | 2.91 | 2.91 |
|          | 100-5-1  | 1.72     | 1.59 | 1.56 | 1.56 | 1.56 |
|          | 100-5-2  | 0.50     | 0.41 | 0.41 | 0.41 | 0.41 |
|          | 100-5-3  | 2.87     | 2.85 | 2.80 | 2.80 | 2.80 |
|          | 200-10-1 | 0.86     | 0.86 | 0.78 | 0.78 | 0.78 |
|          | 200-20-1 | 1.13     | 1.10 | 1.00 | 1.00 | 1.00 |
|          | 200-40-1 | 2.15     | 1.90 | 1.55 | 1.46 | 1.46 |
|          | 300-10-1 | 1.35     | 1.27 | 1.10 | 1.08 | 1.08 |
|          | 300-20-1 | 1.56     | 1.39 | 1.24 | 1.19 | 1.19 |
|          | 300-30-1 | 1.79     | 1.52 | 1.11 | 1.02 | 1.02 |
|          | 300-40-1 | 2.00     | 1.71 | 1.12 | 0.99 | 0.99 |
|          | 300-60-1 | 2.19     | 1.82 | 1.19 | 1.03 | 1.03 |
|          | BM       | 100-10-1 | 1.41 | 1.16 | 0.84 | 0.84 |
| 100-10-2 |          | 1.70     | 1.63 | 1.51 | 1.51 | 1.51 |
| 100-10-3 |          | 2.29     | 1.77 | 1.41 | 1.10 | 1.10 |
| 100-5-1  |          | 1.98     | 1.94 | 1.80 | 1.80 | 1.80 |
| 100-5-2  |          | 1.22     | 1.13 | 0.64 | 0.58 | 0.58 |
| 100-5-3  |          | 2.82     | 2.59 | 2.37 | 2.37 | 2.37 |
| 200-10-1 |          | 1.42     | 1.36 | 1.25 | 1.14 | 1.14 |
| 200-10-2 |          | 1.76     | 1.75 | 1.72 | 1.72 | 1.72 |
| 200-10-3 |          | 1.66     | 1.66 | 1.66 | 1.66 | 1.66 |

algorithm. A dash instead of a best known lower or upper bounds indicates that no such bound has been reported in the literature for the corresponding instance.

## EC.6. Computational results with / without heuristic

This section contains detailed computational results showing the impact of the initial heuristic described in Section 6.1. Tables EC.12 to EC.21 provide obtained lower bounds (LB), upper bounds (UB), and solution times (time) or remaining gaps (gap) [%]. For each considered benchmark problem these numbers are reported for the best known method from the literature (BK), the best performing B&C variant of the considered benchmark problem (BC), and a variant of this B&C without applying the heuristic detailed in Section 6.1 (BC - no heur.).

Table EC.4 Branch-and-cut results for the SDVRP with limited fleet and rounded costs, part 1/2

| instance | C   | BK             |                |             | BC              |                 |             | # lazy cons |     |   |     |     | # fract cuts |      |      |      | heur     |
|----------|-----|----------------|----------------|-------------|-----------------|-----------------|-------------|-------------|-----|---|-----|-----|--------------|------|------|------|----------|
|          |     | LB             | UB             | time        | LB              | UB              | time (gap)  | SY          | SE  | Y | R   | F   | SY           | SE   | Y    | R    |          |
| S101D1   | 100 | 716.00         | 716.00         | 3125        | 716.00          | 716.00          | <b>2919</b> | 0           | 5   | 0 | 135 | 412 | 0            | 114  | 142  | 7265 | 731.00   |
| S101D2   | 100 | <b>1337.10</b> | <b>1366.00</b> | -           | 1276.00         | 1374.00         | (7.1)       | 7           | 21  | 0 | 44  | 0   | 44           | 148  | 597  | 7355 | 1374.00  |
| S101D3   | 100 | <b>1832.20</b> | <b>1864.00</b> | -           | 1773.00         | 1895.00         | (6.4)       | 3           | 39  | 1 | 71  | 0   | 177          | 1175 | 1671 | 6560 | 1895.00  |
| S101D5   | 100 | <b>2737.10</b> | <b>2770.00</b> | -           | 2676.00         | 2823.00         | (5.2)       | 0           | 104 | 0 | 42  | 0   | 0            | 3018 | 2062 | 5741 | 2823.00  |
| S51D1    | 50  | 458.00         | 458.00         | <b>0</b>    | 458.00          | 458.00          | 11          | 0           | 2   | 0 | 2   | 0   | 0            | 8    | 24   | 124  | 458.00   |
| S51D2    | 50  | 703.00         | 703.00         | 800         | 703.00          | 703.00          | <b>266</b>  | 0           | 10  | 0 | 84  | 130 | 0            | 118  | 217  | 1788 | 712.00   |
| S51D3    | 50  | 935.17         | 942.00         | -           | <b>942.00</b>   | 942.00          | <b>1019</b> | 2           | 2   | 0 | 55  | 0   | 82           | 163  | 209  | 2876 | 954.00   |
| S51D4    | 50  | 1551.00        | 1551.00        | 2102        | 1551.00         | 1551.00         | <b>1174</b> | 0           | 20  | 0 | 121 | 0   | 0            | 2309 | 406  | 2013 | 1575.00  |
| S51D5    | 50  | <b>1325.34</b> | 1328.00        | -           | 1318.00         | 1328.00         | (0.8)       | 0           | 20  | 0 | 84  | 0   | 0            | 4466 | 290  | 3075 | 1329.00  |
| S51D6    | 50  | <b>2153.00</b> | 2153.00        | <b>4619</b> | 2148.00         | 2153.00         | (0.2)       | 1           | 44  | 0 | 167 | 0   | 357          | 8305 | 946  | 1860 | 2177.00  |
| S76D1    | 75  | 592.00         | 592.00         | <b>30</b>   | 592.00          | 592.00          | 73          | 0           | 3   | 0 | 26  | 0   | 0            | 20   | 58   | 1804 | 607.00   |
| S76D2    | 75  | <b>1061.10</b> | <b>1082.00</b> | -           | 1044.00         | 1089.00         | (4.1)       | 0           | 59  | 0 | 172 | 107 | 0            | 843  | 466  | 9169 | 1103.00  |
| S76D3    | 75  | <b>1395.90</b> | <b>1420.00</b> | -           | 1375.00         | 1434.00         | (4.1)       | 7           | 42  | 0 | 133 | 0   | 279          | 1797 | 1449 | 7712 | 1434.00  |
| S76D4    | 75  | <b>2046.10</b> | <b>2073.00</b> | -           | 2029.00         | 2097.00         | (3.2)       | 4           | 34  | 0 | 108 | 0   | 588          | 3133 | 3277 | 4576 | 2097.00  |
| SD1      | 8   | 228.00         | 228.00         | <b>0</b>    | 228.00          | 228.00          | 1           | 0           | 0   | 0 | 2   | 0   | 0            | 0    | 2    | 2    | 240.00   |
| SD10     | 64  | <b>2688.00</b> | 2688.00        | <b>2577</b> | 2677.00         | 2688.00         | (0.4)       | 0           | 8   | 0 | 36  | 0   | 0            | 3736 | 679  | 2801 | 2772.00  |
| SD11     | 80  | 13280.00       | 13280.00       | 5241        | 13280.00        | 13280.00        | <b>107</b>  | 0           | 38  | 0 | 11  | 0   | 0            | 272  | 706  | 1056 | 13300.00 |
| SD12     | 80  | 7102.36        | 7315.00        | -           | <b>7178.00</b>  | <b>7216.00</b>  | (0.5)       | 0           | 71  | 0 | 150 | 0   | 0            | 4431 | 1760 | 4891 | 7235.00  |
| SD13     | 96  | 9933.21        | -              | -           | <b>10023.00</b> | <b>10188.00</b> | (1.6)       | 0           | 93  | 0 | 53  | 0   | 0            | 3149 | 2239 | 5779 | 10226.00 |
| SD14     | 120 | -              | -              | -           | <b>10493.00</b> | <b>10889.00</b> | (3.6)       | 0           | 69  | 0 | 11  | 0   | 0            | 2113 | 1584 | 3984 | 10889.00 |
| SD15     | 144 | -              | -              | -           | <b>14738.00</b> | <b>15230.00</b> | (3.2)       | 0           | 100 | 0 | 3   | 0   | 0            | 1355 | 1951 | 4177 | 15230.00 |
| SD16     | 144 | -              | -              | -           | <b>3384.00</b>  | <b>3496.00</b>  | (3.2)       | 0           | 72  | 0 | 137 | 0   | 0            | 1318 | 2526 | 6309 | 3496.00  |
| SD17     | 160 | -              | -              | -           | <b>26198.00</b> | <b>26875.00</b> | (2.5)       | 0           | 72  | 0 | 0   | 0   | 0            | 722  | 1821 | 3847 | 26875.00 |
| SD18     | 160 | -              | -              | -           | <b>13833.00</b> | <b>14534.00</b> | (4.8)       | 0           | 35  | 0 | 1   | 0   | 0            | 756  | 1700 | 3381 | 14534.00 |
| SD19     | 192 | -              | -              | -           | <b>19465.00</b> | <b>20481.00</b> | (5.0)       | 0           | 18  | 0 | 0   | 0   | 0            | 1039 | 2686 | 4634 | 20481.00 |
| SD2      | 16  | 708.00         | 708.00         | <b>0</b>    | 708.00          | 708.00          | 1           | 0           | 0   | 0 | 0   | 0   | 0            | 2    | 25   | 25   | 708.00   |
| SD20     | 240 | -              | -              | -           | <b>38725.80</b> | <b>41046.00</b> | (5.7)       | 0           | 0   | 0 | 0   | 0   | 0            | 1598 | 2365 | 4682 | 41046.00 |
| SD21     | 288 | -              | -              | -           | <b>10887.60</b> | <b>11655.00</b> | (6.6)       | 0           | 0   | 0 | 0   | 0   | 0            | 1043 | 2259 | 3628 | 11655.00 |
| SD3      | 16  | 432.00         | 432.00         | <b>0</b>    | 432.00          | 432.00          | 1           | 0           | 0   | 0 | 2   | 0   | 0            | 0    | 11   | 11   | 452.00   |
| SD4      | 24  | 630.00         | 630.00         | <b>0</b>    | 630.00          | 630.00          | 1           | 0           | 0   | 0 | 15  | 0   | 0            | 1    | 38   | 38   | 642.00   |
| SD5      | 32  | 1392.00        | 1392.00        | 11          | 1392.00         | 1392.00         | <b>5</b>    | 0           | 0   | 0 | 0   | 0   | 0            | 47   | 156  | 257  | 1392.00  |
| SD6      | 32  | 832.00         | 832.00         | <b>1</b>    | 832.00          | 832.00          | 3           | 0           | 11  | 0 | 38  | 0   | 0            | 11   | 107  | 137  | 836.00   |
| SD7      | 40  | 3640.00        | 3640.00        | <b>2</b>    | 3640.00         | 3640.00         | 3           | 0           | 0   | 0 | 0   | 0   | 0            | 80   | 192  | 208  | 3640.00  |
| SD8      | 48  | 5068.00        | 5068.00        | 19          | 5068.00         | 5068.00         | <b>8</b>    | 0           | 23  | 0 | 20  | 0   | 0            | 98   | 224  | 251  | 5068.00  |
| SD9      | 48  | 2046.00        | 2046.00        | 126         | 2046.00         | 2046.00         | <b>80</b>   | 0           | 8   | 0 | 45  | 0   | 0            | 367  | 412  | 962  | 2109.00  |
| eil22    | 21  | 375.00         | 375.00         | <b>0</b>    | 375.00          | 375.00          | 2           | 0           | 0   | 0 | 0   | 0   | 0            | 2    | 35   | 83   | 375.00   |
| eil23    | 22  | 569.00         | 569.00         | <b>0</b>    | 569.00          | 569.00          | 1           | 0           | 0   | 0 | 0   | 0   | 0            | 3    | 14   | 21   | 569.00   |
| eil30    | 29  | 510.00         | 510.00         | 14          | 510.00          | 510.00          | <b>7</b>    | 0           | 5   | 0 | 3   | 15  | 0            | 8    | 39   | 48   | 514.00   |
| eil33    | 32  | 835.00         | 835.00         | <b>2</b>    | 835.00          | 835.00          | 5           | 0           | 0   | 0 | 0   | 0   | 0            | 17   | 115  | 316  | 835.00   |
| eil51    | 50  | 521.00         | 521.00         | 36          | 521.00          | 521.00          | <b>26</b>   | 0           | 0   | 0 | 5   | 0   | 0            | 8    | 58   | 791  | 526.00   |
| eilA101  | 100 | 799.80         | <b>814.00</b>  | -           | <b>807.00</b>   | 818.00          | (1.3)       | 0           | 16  | 0 | 72  | 164 | 0            | 128  | 145  | 9922 | 819.00   |
| eilA76   | 75  | <b>807.60</b>  | <b>818.00</b>  | -           | 800.00          | 829.00          | (3.5)       | 0           | 37  | 0 | 183 | 60  | 0            | 581  | 264  | 8602 | 840.00   |
| eilB101  | 100 | <b>1040.60</b> | <b>1061.00</b> | -           | 1011.00         | 1071.00         | (5.6)       | 3           | 22  | 0 | 93  | 0   | 29           | 50   | 310  | 2703 | 1071.00  |
| eilB76   | 75  | <b>981.40</b>  | <b>1002.00</b> | -           | 958.00          | 1012.00         | (5.3)       | 0           | 48  | 0 | 79  | 0   | 0            | 871  | 353  | 8174 | 1012.00  |
| eilC76   | 75  | 717.80         | 733.00         | -           | <b>724.00</b>   | 733.00          | (1.2)       | 0           | 4   | 0 | 67  | 30  | 0            | 170  | 182  | 6755 | 737.00   |
| eilD76   | 75  | 666.10         | 682.00         | -           | <b>679.00</b>   | <b>679.00</b>   | <b>1670</b> | 0           | 2   | 0 | 35  | 0   | 0            | 64   | 131  | 5742 | 686.00   |

Table EC.5 Branch-and-cut results for the SDVRP with limited fleet and rounded costs, part 2/2

| instance | C   | BK             |                |             | BC             |                 |             | # lazy cons |     |   |     |     | # fract cuts |      |      |      | heur     |
|----------|-----|----------------|----------------|-------------|----------------|-----------------|-------------|-------------|-----|---|-----|-----|--------------|------|------|------|----------|
|          |     | LB             | UB             | time        | LB             | UB              | time (gap)  | SY          | SE  | Y | R   | F   | SY           | SE   | Y    | R    |          |
| p01_1030 | 50  | 753.00         | 753.00         | 6098        | 753.00         | 753.00          | <b>570</b>  | 2           | 4   | 0 | 14  | 139 | 66           | 35   | 163  | 2355 | 757.00   |
| p01_1050 | 50  | <b>993.38</b>  | 998.00         | -           | 993.00         | 998.00          | (0.5)       | 1           | 22  | 0 | 172 | 0   | 133          | 1005 | 421  | 4362 | 1013.00  |
| p01_1090 | 50  | 1480.00        | 1480.00        | <b>5368</b> | 1480.00        | 1480.00         | 6017        | 2           | 45  | 0 | 212 | 1   | 88           | 5172 | 440  | 2421 | 1494.00  |
| p01_110  | 50  | 458.00         | 458.00         | <b>1</b>    | 458.00         | 458.00          | 16          | 0           | 1   | 0 | 10  | 0   | 0            | 11   | 23   | 175  | 459.00   |
| p01_3070 | 50  | <b>1473.00</b> | <b>1473.00</b> | <b>5355</b> | 1460.00        | 1479.00         | (1.3)       | 2           | 21  | 0 | 88  | 0   | 235          | 5219 | 810  | 3543 | 1487.00  |
| p01_7090 | 50  | <b>2137.98</b> | <b>2142.00</b> | -           | 2133.00        | 2143.00         | (0.5)       | 2           | 12  | 0 | 113 | 0   | 335          | 7466 | 1285 | 2183 | 2166.00  |
| p02_1030 | 75  | 1059.86        | 1157.00        | -           | <b>1060.00</b> | <b>1117.00</b>  | (5.1)       | 0           | 42  | 0 | 79  | 0   | 0            | 940  | 329  | 6909 | 1117.00  |
| p02_1050 | 75  | 1449.11        | -              | -           | <b>1451.00</b> | <b>1498.00</b>  | (3.1)       | 0           | 31  | 0 | 49  | 0   | 0            | 3233 | 660  | 6253 | 1498.00  |
| p02_1090 | 75  | 2241.79        | -              | -           | <b>2244.00</b> | <b>2305.00</b>  | (2.6)       | 0           | 117 | 0 | 130 | 0   | 23           | 4915 | 1430 | 5051 | 2305.00  |
| p02_110  | 75  | 612.00         | 612.00         | 4284        | 612.00         | 612.00          | <b>2706</b> | 0           | 3   | 0 | 27  | 0   | 9            | 60   | 73   | 9423 | 619.00   |
| p02_3070 | 75  | <b>2166.59</b> | 2431.00        | -           | 2154.00        | <b>2224.00</b>  | (3.1)       | 2           | 63  | 0 | 76  | 0   | 238          | 4974 | 1833 | 4969 | 2232.00  |
| p02_7090 | 75  | 3155.61        | -              | -           | <b>3157.00</b> | <b>3252.00</b>  | (2.9)       | 7           | 9   | 0 | 7   | 0   | 214          | 284  | 471  | 1112 | 3252.00  |
| p03_1030 | 100 | <b>1379.00</b> | -              | -           | 1352.00        | <b>1450.00</b>  | (6.8)       | 11          | 34  | 0 | 65  | 0   | 54           | 139  | 545  | 6562 | 1450.00  |
| p03_1050 | 100 | <b>1914.80</b> | -              | -           | 1890.00        | <b>2013.00</b>  | (6.1)       | 2           | 51  | 0 | 54  | 0   | 135          | 902  | 1458 | 4151 | 2013.00  |
| p03_1090 | 100 | <b>2994.36</b> | -              | -           | 2964.00        | <b>3098.00</b>  | (4.3)       | 24          | 37  | 1 | 50  | 0   | 393          | 3021 | 2604 | 3936 | 3098.00  |
| p03_110  | 100 | 740.76         | 760.00         | -           | <b>747.00</b>  | <b>749.00</b>   | (0.3)       | 0           | 4   | 0 | 52  | 49  | 0            | 110  | 98   | 7328 | 760.00   |
| p03_3070 | 100 | <b>2894.75</b> | -              | -           | 2855.00        | <b>3006.00</b>  | (5.0)       | 18          | 66  | 0 | 45  | 0   | 240          | 3454 | 2621 | 5149 | 3006.00  |
| p03_7090 | 100 | <b>4269.98</b> | -              | -           | 4249.00        | <b>4385.00</b>  | (3.1)       | 26          | 74  | 1 | 31  | 0   | 548          | 3094 | 2517 | 3447 | 4385.00  |
| p04_1030 | 150 | -              | -              | -           | <b>1843.00</b> | <b>2041.00</b>  | (9.7)       | 0           | 106 | 0 | 25  | 0   | 0            | 369  | 1026 | 2413 | 2041.00  |
| p04_1050 | 150 | -              | -              | -           | <b>2646.00</b> | <b>2856.00</b>  | (7.4)       | 0           | 70  | 0 | 6   | 0   | 0            | 511  | 1269 | 2769 | 2856.00  |
| p04_1090 | 150 | -              | -              | -           | <b>4289.00</b> | <b>4573.00</b>  | (6.2)       | 3           | 89  | 0 | 5   | 0   | 106          | 440  | 1300 | 2464 | 4574.00  |
| p04_110  | 150 | -              | -              | -           | <b>890.00</b>  | <b>926.00</b>   | (3.9)       | 0           | 29  | 0 | 67  | 0   | 0            | 91   | 198  | 3752 | 926.00   |
| p04_3070 | 150 | -              | -              | -           | <b>4098.00</b> | <b>4433.00</b>  | (7.6)       | 1           | 58  | 0 | 5   | 0   | 81           | 679  | 1451 | 2752 | 4433.00  |
| p04_7090 | 150 | -              | -              | -           | <b>6125.00</b> | <b>6447.00</b>  | (5.0)       | 23          | 157 | 0 | 12  | 0   | 365          | 536  | 1072 | 1963 | 6447.00  |
| p05_1030 | 199 | -              | -              | -           | <b>2226.00</b> | <b>2475.00</b>  | (10.1)      | 0           | 26  | 0 | 0   | 0   | 0            | 813  | 2443 | 4766 | 2475.00  |
| p05_1050 | 199 | -              | -              | -           | <b>3179.00</b> | <b>3545.00</b>  | (10.3)      | 0           | 30  | 0 | 0   | 0   | 144          | 841  | 1574 | 2673 | 3545.00  |
| p05_1090 | 199 | -              | -              | -           | <b>5182.00</b> | <b>5602.00</b>  | (7.5)       | 0           | 17  | 0 | 0   | 0   | 47           | 1043 | 1856 | 3131 | 5604.00  |
| p05_110  | 199 | -              | -              | -           | <b>1015.00</b> | <b>1089.00</b>  | (6.8)       | 0           | 35  | 0 | 25  | 0   | 0            | 77   | 272  | 2861 | 1089.00  |
| p05_3070 | 199 | -              | -              | -           | <b>5069.00</b> | <b>5520.00</b>  | (8.2)       | 0           | 50  | 0 | 0   | 0   | 0            | 721  | 1749 | 3093 | 5523.00  |
| p05_7090 | 199 | -              | -              | -           | <b>7832.00</b> | <b>8213.00</b>  | (4.6)       | 9           | 28  | 0 | 0   | 0   | 584          | 1272 | 1323 | 2494 | 8213.00  |
| p10_1030 | 199 | -              | -              | -           | <b>2226.00</b> | <b>2475.00</b>  | (10.1)      | 0           | 27  | 0 | 0   | 0   | 0            | 813  | 2443 | 4766 | 2475.00  |
| p10_1050 | 199 | -              | -              | -           | <b>3179.00</b> | <b>3545.00</b>  | (10.3)      | 0           | 33  | 0 | 0   | 0   | 144          | 841  | 1574 | 2673 | 3545.00  |
| p10_1090 | 199 | -              | -              | -           | <b>5183.00</b> | <b>5602.00</b>  | (7.5)       | 0           | 31  | 0 | 0   | 0   | 47           | 1046 | 1858 | 3134 | 5604.00  |
| p10_110  | 199 | -              | -              | -           | <b>1015.00</b> | <b>1089.00</b>  | (6.8)       | 0           | 35  | 0 | 25  | 0   | 0            | 77   | 272  | 2861 | 1089.00  |
| p10_3070 | 199 | -              | -              | -           | <b>5069.00</b> | <b>5520.00</b>  | (8.2)       | 0           | 39  | 0 | 0   | 0   | 0            | 718  | 1747 | 3090 | 5523.00  |
| p10_7090 | 199 | -              | -              | -           | <b>7832.00</b> | <b>8213.00</b>  | (4.6)       | 10          | 28  | 0 | 0   | 0   | 584          | 1272 | 1323 | 2494 | 8213.00  |
| p11_1030 | 120 | -              | -              | -           | <b>2788.00</b> | <b>3009.00</b>  | (7.3)       | 0           | 102 | 0 | 30  | 0   | 0            | 383  | 1433 | 3166 | 3009.00  |
| p11_1050 | 120 | -              | -              | -           | <b>4074.00</b> | <b>4290.00</b>  | (5.0)       | 6           | 117 | 0 | 13  | 0   | 96           | 1753 | 1972 | 3722 | 4290.00  |
| p11_1090 | 120 | -              | -              | -           | <b>6665.00</b> | <b>6930.00</b>  | (3.8)       | 6           | 77  | 2 | 11  | 0   | 274          | 2916 | 2912 | 3989 | 6931.00  |
| p11_110  | 120 | -              | -              | -           | <b>1014.00</b> | <b>1032.00</b>  | (1.7)       | 0           | 74  | 1 | 365 | 159 | 30           | 730  | 795  | 4433 | 1032.00  |
| p11_3070 | 120 | -              | -              | -           | <b>6415.00</b> | <b>6726.00</b>  | (4.6)       | 0           | 116 | 0 | 5   | 0   | 221          | 3590 | 2920 | 3232 | 6726.00  |
| p11_7090 | 120 | -              | -              | -           | <b>9924.00</b> | <b>10205.00</b> | (2.8)       | 46          | 82  | 0 | 6   | 0   | 679          | 1797 | 2143 | 2534 | 10205.00 |

Table EC.6 Branch-and-cut results for the SDVRP with limited fleet and non-rounded costs, part 1/2

| instance | C   | BK              |                 |             | BC             |               |             | # lazy cons |    |   |     |     | # fract cuts |      |      |       | heur     |
|----------|-----|-----------------|-----------------|-------------|----------------|---------------|-------------|-------------|----|---|-----|-----|--------------|------|------|-------|----------|
|          |     | LB              | UB              | time        | LB             | UB            | time (gap)  | SY          | SE | Y | R   | F   | SY           | SE   | Y    | R     |          |
| S101D1   | 100 | 726.59          | 726.59          | <b>2636</b> | 726.59         | 726.59        | 2796        | 0           | 17 | 0 | 196 | 108 | 0            | 104  | 111  | 7038  | 766.40   |
| S101D2   | 100 | <b>1358.90</b>  | <b>1378.43</b>  | -           | 1298.71        | 1387.93       | (6.4)       | 3           | 10 | 0 | 107 | 0   | 27           | 50   | 287  | 6558  | 1387.93  |
| S101D3   | 100 | <b>1853.10</b>  | <b>1874.81</b>  | -           | 1786.92        | 1924.85       | (7.2)       | 9           | 18 | 0 | 96  | 0   | 55           | 108  | 699  | 6381  | 1924.85  |
| S101D5   | 100 | <b>2767.60</b>  | <b>2791.22</b>  | -           | 2712.98        | 2866.23       | (5.3)       | 0           | 56 | 0 | 116 | 0   | 0            | 360  | 1384 | 6623  | 2866.23  |
| S51D1    | 50  | 459.50          | 459.50          | <b>0</b>    | 459.50         | 459.50        | 27          | 0           | 0  | 0 | 4   | 0   | 0            | 7    | 20   | 170   | 461.24   |
| S51D2    | 50  | 708.42          | 708.42          | 368         | 708.42         | 708.42        | <b>146</b>  | 0           | 1  | 0 | 24  | 20  | 0            | 22   | 87   | 1965  | 709.63   |
| S51D3    | 50  | 940.82          | 947.97          | -           | <b>947.97</b>  | 947.97        | <b>1398</b> | 0           | 1  | 0 | 142 | 0   | 64           | 18   | 128  | 3435  | 957.14   |
| S51D4    | 50  | 1553.47         | 1560.88         | -           | <b>1560.88</b> | 1560.88       | <b>695</b>  | 0           | 5  | 0 | 72  | 0   | 0            | 26   | 367  | 2057  | 1570.79  |
| S51D5    | 50  | 1326.61         | 1333.67         | -           | <b>1330.24</b> | 1333.67       | (0.3)       | 0           | 1  | 0 | 169 | 0   | 0            | 35   | 250  | 4416  | 1360.67  |
| S51D6    | 50  | 2165.64         | 2169.10         | -           | <b>2169.10</b> | 2169.10       | <b>2233</b> | 1           | 3  | 1 | 93  | 0   | 267          | 223  | 1060 | 2473  | 2191.27  |
| S76D1    | 75  | 598.94          | 598.94          | 164         | 598.94         | 598.94        | <b>57</b>   | 0           | 2  | 0 | 15  | 0   | 0            | 12   | 39   | 1638  | 612.22   |
| S76D2    | 75  | <b>1071.30</b>  | <b>1087.40</b>  | -           | 1050.85        | 1102.03       | (4.6)       | 0           | 10 | 0 | 179 | 42  | 0            | 163  | 186  | 10546 | 1113.00  |
| S76D3    | 75  | <b>1407.54</b>  | <b>1427.86</b>  | -           | 1387.57        | 1438.24       | (3.5)       | 0           | 5  | 0 | 401 | 0   | 250          | 93   | 534  | 10392 | 1438.24  |
| S76D4    | 75  | <b>2059.80</b>  | <b>2079.76</b>  | -           | 2049.88        | 2099.94       | (2.4)       | 3           | 5  | 0 | 89  | 0   | 375          | 100  | 2378 | 5192  | 2102.12  |
| SD1      | 8   | 228.28          | 228.28          | <b>0</b>    | 228.28         | 228.28        | 1           | 0           | 0  | 0 | 2   | 0   | 0            | 0    | 2    | 2     | 240.65   |
| SD10     | 64  | <b>2684.88</b>  | <b>2684.88</b>  | <b>70</b>   | 2670.17        | 2684.89       | (0.5)       | 0           | 31 | 0 | 92  | 0   | 0            | 1738 | 757  | 3151  | 2759.67  |
| SD11     | 80  | 13280.00        | 13280.00        | 5331        | 13280.00       | 13280.00      | <b>134</b>  | 0           | 99 | 0 | 70  | 0   | 0            | 434  | 694  | 1154  | 13320.00 |
| SD12     | 80  | <b>7175.80</b>  | <b>7213.61</b>  | -           | 7153.52        | 7230.52       | (1.1)       | 0           | 74 | 0 | 111 | 0   | 0            | 3862 | 1673 | 5226  | 7238.65  |
| SD13     | 96  | <b>10053.60</b> | <b>10110.58</b> | -           | 10015.90       | 10110.60      | (0.9)       | 0           | 55 | 0 | 46  | 0   | 0            | 3428 | 2066 | 5566  | 10187.20 |
| SD14     | 120 | <b>10588.20</b> | <b>10725.38</b> | -           | 10499.60       | 10837.70      | (3.1)       | 0           | 85 | 0 | 21  | 0   | 0            | 2054 | 1691 | 4090  | 10837.70 |
| SD15     | 144 | <b>14908.50</b> | <b>15129.68</b> | -           | 14755.80       | 15379.30      | (4.1)       | 0           | 86 | 0 | 8   | 0   | 0            | 1391 | 2054 | 4291  | 15379.30 |
| SD16     | 144 | <b>3381.30</b>  | <b>3381.30</b>  | <b>6</b>    | 3381.08        | 3456.45       | (2.2)       | 0           | 52 | 0 | 170 | 0   | 0            | 326  | 1701 | 5908  | 3511.02  |
| SD17     | 160 | <b>26317.20</b> | <b>26533.39</b> | -           | 26236.40       | 26997.60      | (2.8)       | 0           | 38 | 0 | 1   | 0   | 0            | 1103 | 2095 | 4563  | 26997.60 |
| SD18     | 160 | <b>14029.20</b> | <b>14283.51</b> | -           | 13813.20       | 14619.30      | (5.5)       | 0           | 58 | 0 | 6   | 0   | 0            | 724  | 1523 | 3164  | 14619.30 |
| SD19     | 192 | <b>19707.20</b> | <b>20191.20</b> | -           | 19424.90       | 20653.70      | (5.9)       | 0           | 32 | 0 | 0   | 0   | 0            | 1089 | 2118 | 3874  | 20653.70 |
| SD2      | 16  | 708.28          | 708.28          | <b>0</b>    | 708.28         | 708.28        | 1           | 0           | 0  | 0 | 0   | 0   | 0            | 4    | 33   | 33    | 708.28   |
| SD20     | 240 | <b>39252.80</b> | <b>39840.00</b> | -           | 38724.40       | 40320.80      | (4.0)       | 0           | 0  | 0 | 0   | 0   | 0            | 1271 | 2452 | 4634  | 40320.80 |
| SD21     | 288 | <b>11271.10</b> | <b>11271.10</b> | <b>205</b>  | 10974.80       | 11579.10      | (5.2)       | 0           | 27 | 0 | 0   | 0   | 0            | 432  | 1290 | 2463  | 11579.10 |
| SD3      | 16  | 430.58          | 430.58          | <b>0</b>    | 430.58         | 430.58        | 2           | 0           | 0  | 0 | 0   | 0   | 0            | 0    | 8    | 8     | 430.58   |
| SD4      | 24  | 631.05          | 631.05          | <b>0</b>    | 631.05         | 631.05        | 3           | 0           | 0  | 0 | 0   | 0   | 0            | 2    | 41   | 41    | 631.05   |
| SD5      | 32  | 1390.57         | 1390.57         | 13          | 1390.57        | 1390.57       | <b>4</b>    | 0           | 0  | 0 | 0   | 0   | 0            | 39   | 168  | 285   | 1390.57  |
| SD6      | 32  | 831.24          | 831.24          | <b>0</b>    | 831.24         | 831.24        | <b>4</b>    | 0           | 3  | 0 | 22  | 0   | 0            | 4    | 119  | 237   | 834.08   |
| SD7      | 40  | 3640.00         | 3640.00         | 17          | 3640.00        | 3640.00       | <b>3</b>    | 0           | 14 | 0 | 6   | 0   | 0            | 78   | 190  | 221   | 3640.00  |
| SD8      | 48  | 5068.28         | 5068.28         | 67          | 5068.28        | 5068.28       | <b>12</b>   | 0           | 5  | 0 | 9   | 0   | 0            | 103  | 247  | 264   | 5068.28  |
| SD9      | 48  | 2044.20         | 2044.20         | <b>11</b>   | 2044.20        | 2044.20       | 101         | 0           | 6  | 0 | 44  | 0   | 0            | 415  | 364  | 962   | 2081.45  |
| eil22    | 21  | 375.28          | 375.28          | <b>0</b>    | 375.28         | 375.28        | 2           | 0           | 0  | 0 | 0   | 0   | 0            | 4    | 34   | 76    | 375.28   |
| eil23    | 22  | 568.56          | 568.56          | <b>0</b>    | 568.56         | 568.56        | 1           | 0           | 0  | 0 | 0   | 0   | 0            | 2    | 14   | 17    | 568.56   |
| eil30    | 29  | 512.72          | 512.72          | <b>8</b>    | 512.72         | 512.72        | 9           | 0           | 3  | 0 | 0   | 81  | 0            | 9    | 48   | 66    | 512.72   |
| eil33    | 32  | 837.06          | 837.06          | <b>2</b>    | 837.06         | 837.06        | 8           | 0           | 1  | 0 | 5   | 20  | 0            | 16   | 105  | 263   | 837.06   |
| eil51    | 50  | 524.61          | 524.61          | <b>17</b>   | 524.61         | 524.61        | 22          | 0           | 0  | 0 | 8   | 3   | 0            | 16   | 52   | 953   | 527.67   |
| eilA101  | 100 | 810.06          | <b>826.14</b>   | -           | <b>816.94</b>  | 831.25        | (1.7)       | 0           | 12 | 0 | 104 | 175 | 0            | 98   | 134  | 12841 | 835.79   |
| eilA76   | 75  | <b>809.67</b>   | <b>823.89</b>   | -           | 806.91         | 827.23        | (2.5)       | 0           | 15 | 0 | 115 | 121 | 0            | 104  | 161  | 8258  | 849.01   |
| eilB101  | 100 | <b>1055.40</b>  | <b>1076.26</b>  | -           | 1023.93        | 1088.32       | (5.9)       | 3           | 7  | 0 | 124 | 0   | 101          | 39   | 183  | 5396  | 1088.32  |
| eilB76   | 75  | <b>985.42</b>   | <b>1009.04</b>  | -           | 966.46         | 1019.12       | (5.2)       | 0           | 4  | 0 | 92  | 0   | 0            | 102  | 241  | 10511 | 1019.12  |
| eilC76   | 75  | 724.62          | <b>738.67</b>   | -           | <b>729.07</b>  | 740.31        | (1.5)       | 0           | 1  | 0 | 32  | 36  | 0            | 67   | 113  | 8087  | 740.31   |
| eilD76   | 75  | 677.32          | 687.60          | -           | <b>682.67</b>  | <b>686.70</b> | (0.6)       | 0           | 3  | 0 | 42  | 22  | 0            | 75   | 50   | 9188  | 696.34   |

Table EC.7 Branch-and-cut results for the SDVRP with limited fleet and non-rounded costs, part 2/2

| instance | C   | BK              |                |          | BC             |                 |             | # lazy cons |    |    |     |     | # fract cuts |      |      |       | heur     |
|----------|-----|-----------------|----------------|----------|----------------|-----------------|-------------|-------------|----|----|-----|-----|--------------|------|------|-------|----------|
|          |     | LB              | UB             | time     | LB             | UB              | time (gap)  | SY          | SE | Y  | R   | F   | SY           | SE   | Y    | R     |          |
| p01_1030 | 50  | 756.71          | 756.71         | 915      | 756.71         | 756.71          | <b>343</b>  | 0           | 6  | 0  | 35  | 40  | 64           | 21   | 103  | 2142  | 763.04   |
| p01_1050 | 50  | 996.93          | 1005.75        | -        | <b>999.21</b>  | 1005.75         | (0.7)       | 0           | 1  | 0  | 45  | 0   | 60           | 40   | 237  | 5623  | 1017.76  |
| p01_1090 | 50  | 1485.00         | 1487.18        | -        | <b>1487.18</b> | 1487.18         | <b>1326</b> | 0           | 0  | 0  | 94  | 0   | 47           | 23   | 363  | 2597  | 1497.04  |
| p01_110  | 50  | 459.50          | 459.50         | <b>0</b> | 459.50         | 459.50          | 11          | 0           | 0  | 0  | 1   | 0   | 0            | 5    | 26   | 231   | 464.64   |
| p01_3070 | 50  | <b>1474.10</b>  | 1481.71        | -        | 1472.36        | 1481.71         | (0.6)       | 1           | 0  | 1  | 114 | 0   | 157          | 81   | 423  | 5876  | 1497.66  |
| p01_7090 | 50  | 2149.05         | 2156.14        | -        | <b>2152.60</b> | 2156.14         | (0.2)       | 5           | 3  | 0  | 112 | 0   | 331          | 122  | 1208 | 2765  | 2183.33  |
| p02_1030 | 75  | <b>1093.56</b>  | <b>1122.91</b> | -        | 1064.84        | 1125.36         | (5.4)       | 0           | 22 | 0  | 180 | 149 | 0            | 131  | 228  | 10404 | 1125.36  |
| p02_1050 | 75  | <b>1483.17</b>  | 1509.79        | -        | 1464.75        | <b>1508.10</b>  | (2.9)       | 0           | 2  | 0  | 82  | 0   | 0            | 83   | 365  | 9418  | 1509.09  |
| p02_1090 | 75  | <b>2270.44</b>  | 2372.22        | -        | 2263.33        | <b>2327.94</b>  | (2.8)       | 0           | 70 | 0  | 536 | 35  | 21           | 325  | 1100 | 7384  | 2334.79  |
| p02_110  | 75  | 616.58          | 617.85         | -        | <b>617.85</b>  | 617.85          | <b>4680</b> | 0           | 3  | 0  | 33  | 7   | 9            | 61   | 50   | 10285 | 635.21   |
| p02_3070 | 75  | <b>2192.25</b>  | <b>2235.61</b> | -        | 2170.06        | 2239.89         | (3.1)       | 1           | 31 | 2  | 165 | 0   | 246          | 317  | 1210 | 7288  | 2268.25  |
| p02_7090 | 75  | <b>3192.10</b>  | <b>3253.71</b> | -        | 3179.68        | 3262.83         | (2.5)       | 5           | 54 | 17 | 213 | 0   | 408          | 1154 | 2491 | 5118  | 3263.33  |
| p03_1030 | 100 | <b>1435.23</b>  | 1491.82        | -        | 1368.80        | <b>1480.01</b>  | (7.5)       | 3           | 2  | 3  | 73  | 0   | 35           | 62   | 297  | 7127  | 1480.01  |
| p03_1050 | 100 | <b>1971.43</b>  | <b>2018.09</b> | -        | 1911.33        | 2038.20         | (6.2)       | 1           | 11 | 1  | 66  | 0   | 50           | 122  | 901  | 7541  | 2038.20  |
| p03_1090 | 100 | <b>3043.27</b>  | 3136.29        | -        | 3008.80        | <b>3119.57</b>  | (3.6)       | 11          | 12 | 6  | 92  | 0   | 220          | 156  | 1236 | 5457  | 3119.57  |
| p03_110  | 100 | 753.12          | 762.40         | -        | <b>756.25</b>  | <b>760.00</b>   | (0.5)       | 0           | 3  | 0  | 54  | 13  | 0            | 98   | 174  | 10187 | 765.25   |
| p03_3070 | 100 | <b>2945.76</b>  | 3044.92        | -        | 2898.70        | <b>3030.84</b>  | (4.4)       | 15          | 23 | 2  | 104 | 0   | 168          | 476  | 1539 | 6089  | 3030.89  |
| p03_7090 | 100 | <b>4316.42</b>  | 4452.55        | -        | 4302.24        | <b>4417.50</b>  | (2.6)       | 15          | 30 | 17 | 94  | 0   | 531          | 1167 | 2306 | 4129  | 4417.53  |
| p04_1030 | 150 | <b>1986.79</b>  | 2109.45        | -        | 1886.15        | <b>2052.27</b>  | (8.1)       | 0           | 4  | 0  | 18  | 0   | 0            | 126  | 1032 | 8719  | 2052.27  |
| p04_1050 | 150 | <b>2811.64</b>  | 2956.18        | -        | 2708.02        | <b>2909.28</b>  | (6.9)       | 0           | 7  | 0  | 12  | 0   | 0            | 234  | 1596 | 9837  | 2909.28  |
| p04_1090 | 150 | <b>4474.18</b>  | 4708.11        | -        | 4389.91        | <b>4622.66</b>  | (5.0)       | 2           | 12 | 2  | 10  | 0   | 105          | 298  | 1724 | 6615  | 4622.75  |
| p04_110  | 150 | 896.03          | 1065.94        | -        | <b>899.53</b>  | <b>926.94</b>   | (3.0)       | 0           | 4  | 0  | 37  | 0   | 0            | 72   | 90   | 5449  | 926.94   |
| p04_3070 | 150 | <b>4269.77</b>  | 4637.69        | -        | 4174.84        | <b>4464.12</b>  | (6.5)       | 1           | 36 | 4  | 41  | 0   | 59           | 439  | 1609 | 4245  | 4465.86  |
| p04_7090 | 150 | <b>6287.09</b>  | 6529.63        | -        | 6232.93        | <b>6481.48</b>  | (3.8)       | 19          | 64 | 1  | 53  | 0   | 352          | 538  | 1657 | 3253  | 6481.72  |
| p05_1030 | 199 | <b>2423.64</b>  | 2632.22        | -        | 2259.42        | <b>2524.65</b>  | (10.5)      | 0           | 0  | 0  | 0   | 0   | 0            | 417  | 2322 | 7889  | 2524.65  |
| p05_1050 | 199 | <b>3420.17</b>  | 3548.13        | -        | 3205.67        | <b>3542.18</b>  | (9.5)       | 1           | 32 | 0  | 3   | 0   | 115          | 689  | 1287 | 2272  | 3542.18  |
| p05_1090 | 199 | <b>5425.69</b>  | 5894.69        | -        | 5240.85        | <b>5656.48</b>  | (7.3)       | 0           | 22 | 0  | 0   | 0   | 42           | 780  | 1875 | 3113  | 5656.93  |
| p05_110  | 199 | <b>1042.37</b>  | 1188.45        | -        | 1029.40        | <b>1112.60</b>  | (7.5)       | 0           | 12 | 0  | 26  | 0   | 0            | 69   | 233  | 2715  | 1112.60  |
| p05_3070 | 199 | <b>5306.11</b>  | 5669.69        | -        | 5138.50        | <b>5557.55</b>  | (7.5)       | 0           | 28 | 0  | 0   | 0   | 0            | 922  | 1900 | 3321  | 5558.31  |
| p05_7090 | 199 | <b>8062.24</b>  | 8400.74        | -        | 7936.82        | <b>8323.17</b>  | (4.6)       | 10          | 25 | 0  | 5   | 0   | 493          | 840  | 1354 | 2295  | 8324.13  |
| p10_1030 | 199 | -               | -              | -        | <b>2259.42</b> | <b>2524.65</b>  | (10.5)      | 0           | 0  | 0  | 0   | 0   | 0            | 417  | 2322 | 7889  | 2524.65  |
| p10_1050 | 199 | -               | -              | -        | <b>3205.67</b> | <b>3542.18</b>  | (9.5)       | 1           | 32 | 0  | 3   | 0   | 115          | 689  | 1287 | 2272  | 3542.18  |
| p10_1090 | 199 | -               | -              | -        | <b>5240.85</b> | <b>5656.48</b>  | (7.3)       | 0           | 32 | 0  | 0   | 0   | 42           | 780  | 1875 | 3113  | 5656.93  |
| p10_110  | 199 | -               | -              | -        | <b>1029.62</b> | <b>1112.60</b>  | (7.5)       | 0           | 15 | 0  | 48  | 0   | 0            | 70   | 233  | 2785  | 1112.60  |
| p10_3070 | 199 | -               | -              | -        | <b>5138.50</b> | <b>5557.55</b>  | (7.5)       | 0           | 28 | 0  | 0   | 0   | 0            | 922  | 1900 | 3321  | 5558.31  |
| p10_7090 | 199 | -               | -              | -        | <b>7937.69</b> | <b>8323.17</b>  | (4.6)       | 9           | 28 | 0  | 5   | 0   | 493          | 841  | 1355 | 2297  | 8324.13  |
| p11_1030 | 120 | <b>2879.63</b>  | <b>2988.61</b> | -        | 2845.77        | 3012.26         | (5.5)       | 0           | 16 | 0  | 107 | 0   | 0            | 241  | 1289 | 6891  | 3012.26  |
| p11_1050 | 120 | 4162.99         | <b>4308.17</b> | -        | <b>4167.34</b> | 4350.64         | (4.2)       | 0           | 19 | 0  | 86  | 0   | 88           | 252  | 1916 | 6532  | 4350.64  |
| p11_1090 | 120 | <b>6808.07</b>  | <b>7020.87</b> | -        | 6732.76        | 7034.31         | (4.3)       | 5           | 59 | 3  | 31  | 0   | 192          | 1344 | 2354 | 4681  | 7034.31  |
| p11_110  | 120 | 1023.37         | 1063.73        | -        | <b>1027.54</b> | <b>1043.57</b>  | (1.5)       | 1           | 58 | 0  | 349 | 105 | 43           | 612  | 740  | 5196  | 1049.30  |
| p11_3070 | 120 | <b>6584.11</b>  | 6860.65        | -        | 6537.36        | <b>6748.64</b>  | (3.1)       | 3           | 32 | 10 | 55  | 0   | 128          | 1089 | 2183 | 3951  | 6748.64  |
| p11_7090 | 120 | <b>10111.11</b> | 10456.19       | -        | 10065.00       | <b>10322.50</b> | (2.5)       | 10          | 56 | 8  | 37  | 0   | 428          | 2547 | 3216 | 3628  | 10322.90 |

Table EC.8 Branch-and-cut results for the SDVRP with unlimited fleet and rounded costs, part 1/2

| instance | C   | BK             |                 |             | BC              |                 |             | # lazy cons |    |   |     |     | # fract cuts |      |      |      | hour     |
|----------|-----|----------------|-----------------|-------------|-----------------|-----------------|-------------|-------------|----|---|-----|-----|--------------|------|------|------|----------|
|          |     | LB             | UB              | time        | LB              | UB              | time (gap)  | SY          | SE | Y | R   | F   | SY           | SE   | Y    | R    |          |
| S101D1   | 100 | 714.87         | 716.00          | -           | <b>716.00</b>   | 716.00          | <b>4374</b> | 0           | 14 | 0 | 219 | 240 | 5            | 76   | 176  | 6523 | 746.00   |
| S101D2   | 100 | <b>1301.93</b> | <b>1366.00</b>  | -           | 1277.00         | 1374.00         | (7.1)       | 3           | 16 | 0 | 58  | 0   | 68           | 143  | 677  | 6362 | 1374.00  |
| S101D3   | 100 | <b>1803.51</b> | <b>1864.00</b>  | -           | 1772.00         | 1890.00         | (6.2)       | 7           | 47 | 0 | 47  | 0   | 146          | 769  | 1230 | 5654 | 1890.00  |
| S101D5   | 100 | <b>2709.48</b> | <b>2770.00</b>  | -           | 2668.00         | 2804.00         | (4.9)       | 11          | 43 | 0 | 36  | 0   | 343          | 2804 | 2590 | 4994 | 2804.00  |
| S51D1    | 50  | 458.00         | 458.00          | 20          | 458.00          | 458.00          | <b>14</b>   | 0           | 1  | 0 | 9   | 0   | 6            | 9    | 59   | 218  | 470.00   |
| S51D2    | 50  | 703.00         | 703.00          | 674         | 703.00          | 703.00          | <b>198</b>  | 0           | 12 | 0 | 50  | 33  | 25           | 45   | 184  | 1907 | 716.00   |
| S51D3    | 50  | 933.07         | 943.00          | -           | <b>942.00</b>   | <b>942.00</b>   | <b>944</b>  | 1           | 5  | 0 | 87  | 0   | 99           | 152  | 295  | 2647 | 954.00   |
| S51D4    | 50  | 1547.44        | 1551.00         | -           | <b>1551.00</b>  | 1551.00         | <b>2266</b> | 0           | 22 | 0 | 57  | 0   | 263          | 2481 | 758  | 2240 | 1569.00  |
| S51D5    | 50  | <b>1326.73</b> | 1328.00         | -           | 1316.00         | 1328.00         | (0.9)       | 0           | 22 | 0 | 97  | 0   | 123          | 4387 | 350  | 2948 | 1329.00  |
| S51D6    | 50  | <b>2153.00</b> | <b>2153.00</b>  | <b>4110</b> | 2147.00         | 2166.00         | (0.9)       | 1           | 46 | 0 | 289 | 0   | 377          | 5813 | 1500 | 2682 | 2175.00  |
| S76D1    | 75  | 592.00         | 592.00          | 134         | 592.00          | 592.00          | <b>101</b>  | 0           | 1  | 0 | 29  | 0   | 3            | 26   | 72   | 2493 | 607.00   |
| S76D2    | 75  | <b>1040.67</b> | <b>1082.00</b>  | -           | 1039.00         | 1092.00         | (4.9)       | 0           | 21 | 0 | 33  | 0   | 126          | 565  | 486  | 9695 | 1092.00  |
| S76D3    | 75  | <b>1379.57</b> | <b>1420.00</b>  | -           | 1375.00         | 1434.00         | (4.1)       | 8           | 44 | 0 | 176 | 0   | 212          | 1790 | 1233 | 7855 | 1434.00  |
| S76D4    | 75  | <b>2034.70</b> | <b>2073.00</b>  | -           | 2030.00         | 2096.00         | (3.1)       | 7           | 27 | 0 | 73  | 1   | 497          | 3176 | 3210 | 4489 | 2097.00  |
| SD1      | 8   | 228.00         | 228.00          | 0           | 228.00          | 228.00          | 0           | 0           | 0  | 0 | 0   | 0   | 4            | 0    | 21   | 22   | 240.00   |
| SD10     | 64  | <b>2688.00</b> | <b>2688.00</b>  | <b>2317</b> | 2670.00         | 2698.00         | (1.0)       | 6           | 19 | 0 | 139 | 0   | 160          | 2987 | 1593 | 3613 | 2744.00  |
| SD11     | 80  | 13280.00       | 13280.00        | 999         | 13280.00        | 13280.00        | <b>140</b>  | 0           | 49 | 0 | 33  | 0   | 202          | 248  | 755  | 1135 | 13340.00 |
| SD12     | 80  | 7133.81        | 7279.00         | -           | <b>7168.00</b>  | <b>7221.00</b>  | (0.7)       | 15          | 46 | 0 | 72  | 0   | 505          | 3624 | 2614 | 3941 | 7274.00  |
| SD13     | 96  | 9992.94        | <b>10112.00</b> | -           | <b>10033.00</b> | 10232.00        | (1.9)       | 3           | 70 | 0 | 40  | 0   | 781          | 3202 | 2627 | 4167 | 10232.00 |
| SD14     | 120 | -              | -               | -           | <b>10485.00</b> | <b>10819.00</b> | (3.1)       | 24          | 32 | 1 | 17  | 0   | 343          | 2022 | 1554 | 3736 | 10819.00 |
| SD15     | 144 | -              | -               | -           | <b>14776.00</b> | <b>15159.00</b> | (2.5)       | 1           | 61 | 0 | 12  | 0   | 517          | 1505 | 1546 | 3642 | 15159.00 |
| SD16     | 144 | -              | -               | -           | <b>3348.00</b>  | <b>3491.00</b>  | (4.1)       | 6           | 55 | 0 | 374 | 0   | 217          | 1038 | 2446 | 5347 | 3491.00  |
| SD17     | 160 | -              | -               | -           | <b>26269.00</b> | <b>26883.00</b> | (2.3)       | 7           | 58 | 0 | 1   | 0   | 680          | 970  | 2052 | 4122 | 26883.00 |
| SD18     | 160 | -              | -               | -           | <b>13826.00</b> | <b>14507.00</b> | (4.7)       | 8           | 24 | 0 | 6   | 0   | 452          | 785  | 1528 | 3212 | 14507.00 |
| SD19     | 192 | -              | -               | -           | <b>19418.00</b> | <b>20408.00</b> | (4.9)       | 1           | 24 | 1 | 1   | 0   | 539          | 963  | 1835 | 3516 | 20408.00 |
| SD2      | 16  | 708.00         | 708.00          | 0           | 708.00          | 708.00          | 1           | 0           | 0  | 0 | 0   | 0   | 31           | 7    | 35   | 46   | 708.00   |
| SD20     | 240 | -              | -               | -           | <b>38697.70</b> | <b>40657.00</b> | (4.8)       | 0           | 0  | 0 | 0   | 0   | 979          | 1453 | 2153 | 3949 | 40657.00 |
| SD21     | 288 | -              | -               | -           | <b>10956.00</b> | <b>11669.00</b> | (6.1)       | 2           | 26 | 0 | 0   | 0   | 1411         | 524  | 2408 | 2213 | 11669.00 |
| SD3      | 16  | 432.00         | 432.00          | 0           | 432.00          | 432.00          | 2           | 0           | 0  | 0 | 0   | 0   | 14           | 0    | 38   | 47   | 432.00   |
| SD4      | 24  | 630.00         | 630.00          | 1           | 630.00          | 630.00          | 3           | 0           | 0  | 0 | 1   | 0   | 32           | 0    | 106  | 114  | 634.00   |
| SD5      | 32  | 1392.00        | 1392.00         | 15          | 1392.00         | 1392.00         | 4           | 0           | 0  | 0 | 0   | 0   | 50           | 20   | 139  | 259  | 1392.00  |
| SD6      | 32  | 832.00         | 832.00          | 3           | 832.00          | 832.00          | 4           | 0           | 0  | 0 | 0   | 0   | 39           | 2    | 81   | 198  | 835.00   |
| SD7      | 40  | 3640.00        | 3640.00         | 26          | 3640.00         | 3640.00         | 4           | 0           | 0  | 0 | 0   | 0   | 77           | 65   | 142  | 210  | 3640.00  |
| SD8      | 48  | 5068.00        | 5068.00         | 33          | 5068.00         | 5068.00         | <b>11</b>   | 0           | 0  | 0 | 0   | 0   | 89           | 100  | 234  | 297  | 5068.00  |
| SD9      | 48  | 2046.00        | 2046.00         | 174         | 2046.00         | 2046.00         | <b>126</b>  | 0           | 0  | 0 | 14  | 0   | 101          | 129  | 254  | 697  | 2079.00  |
| eil22    | 21  | 375.00         | 375.00          | 1           | 375.00          | 375.00          | 2           | 0           | 0  | 0 | 0   | 0   | 3            | 3    | 35   | 114  | 375.00   |
| eil23    | 22  | 569.00         | 569.00          | 2           | 569.00          | 569.00          | 1           | 0           | 0  | 0 | 0   | 0   | 7            | 2    | 14   | 16   | 569.00   |
| eil30    | 29  | 503.00         | 503.00          | 1           | 503.00          | 503.00          | 3           | 0           | 0  | 0 | 0   | 0   | 7            | 6    | 35   | 38   | 503.00   |
| eil33    | 32  | 835.00         | 835.00          | 12          | 835.00          | 835.00          | 5           | 0           | 0  | 0 | 0   | 0   | 8            | 16   | 118  | 273  | 835.00   |
| eil51    | 50  | 521.00         | 521.00          | 61          | 521.00          | 521.00          | <b>20</b>   | 0           | 0  | 0 | 3   | 0   | 5            | 9    | 97   | 586  | 526.00   |
| eilA101  | 100 | 792.40         | <b>814.00</b>   | -           | <b>806.00</b>   | 817.00          | (1.3)       | 0           | 3  | 0 | 51  | 0   | 182          | 113  | 209  | 9253 | 819.00   |
| eilA76   | 75  | 792.71         | <b>818.00</b>   | -           | <b>799.00</b>   | 823.00          | (2.9)       | 0           | 19 | 0 | 58  | 0   | 65           | 233  | 264  | 7321 | 823.00   |
| eilB101  | 100 | <b>1017.77</b> | <b>1061.00</b>  | -           | 1012.00         | 1071.00         | (5.5)       | 2           | 20 | 0 | 112 | 0   | 36           | 66   | 328  | 3921 | 1071.00  |
| eilB76   | 75  | <b>957.60</b>  | <b>1002.00</b>  | -           | 956.00          | 1015.00         | (5.8)       | 0           | 42 | 0 | 103 | 0   | 174          | 497  | 322  | 8796 | 1015.00  |
| eilC76   | 75  | 714.24         | <b>733.00</b>   | -           | <b>721.00</b>   | 734.00          | (1.8)       | 0           | 9  | 0 | 60  | 170 | 33           | 150  | 283  | 7310 | 737.00   |
| eilD76   | 75  | 667.93         | 682.00          | -           | <b>679.00</b>   | <b>679.00</b>   | <b>5746</b> | 0           | 11 | 0 | 106 | 30  | 19           | 154  | 151  | 8706 | 695.00   |

Table EC.9 Branch-and-cut results for the SDVRP with unlimited fleet and rounded costs, part 2/2

| instance | C   | BK             |                |             | BC             |                 |             | # lazy cons |     |   |     |     | # fract cuts |      |      |      | heur     |
|----------|-----|----------------|----------------|-------------|----------------|-----------------|-------------|-------------|-----|---|-----|-----|--------------|------|------|------|----------|
|          |     | LB             | UB             | time        | LB             | UB              | time (gap)  | SY          | SE  | Y | R   | F   | SY           | SE   | Y    | R    |          |
| p01_1030 | 50  | 752.00         | 753.00         | -           | <b>753.00</b>  | 753.00          | <b>415</b>  | 1           | 12  | 0 | 23  | 156 | 52           | 43   | 120  | 1981 | 757.00   |
| p01_1050 | 50  | 991.36         | 998.00         | -           | <b>998.00</b>  | 998.00          | <b>6710</b> | 0           | 4   | 0 | 19  | 0   | 99           | 597  | 338  | 4837 | 1013.00  |
| p01_1090 | 50  | 1480.00        | 1480.00        | 3725        | 1480.00        | 1480.00         | <b>3655</b> | 1           | 20  | 0 | 127 | 0   | 176          | 2335 | 493  | 2374 | 1493.00  |
| p01_110  | 50  | 458.00         | 458.00         | <b>10</b>   | 458.00         | 458.00          | 17          | 0           | 1   | 0 | 3   | 0   | 4            | 10   | 39   | 194  | 458.00   |
| p01_3070 | 50  | <b>1473.00</b> | <b>1473.00</b> | <b>6953</b> | 1458.00        | 1479.00         | (1.4)       | 5           | 6   | 0 | 68  | 0   | 258          | 4305 | 694  | 3289 | 1482.00  |
| p01_7090 | 50  | <b>2134.87</b> | 2142.00        | -           | 2133.00        | 2142.00         | (0.4)       | 3           | 9   | 0 | 79  | 0   | 415          | 7553 | 1360 | 2350 | 2166.00  |
| p02_1030 | 75  | <b>1062.36</b> | 1172.00        | -           | 1061.00        | <b>1108.00</b>  | (4.2)       | 0           | 21  | 0 | 49  | 0   | 63           | 817  | 493  | 8560 | 1108.00  |
| p02_1050 | 75  | <b>1456.12</b> | 1557.00        | -           | 1451.00        | <b>1499.00</b>  | (3.2)       | 0           | 29  | 0 | 28  | 0   | 108          | 2020 | 828  | 6248 | 1499.00  |
| p02_1090 | 75  | <b>2258.51</b> | <b>2304.00</b> | -           | 2246.00        | 2305.00         | (2.6)       | 3           | 44  | 0 | 40  | 0   | 509          | 4320 | 2833 | 4796 | 2305.00  |
| p02_110  | 75  | 609.19         | 612.00         | -           | <b>612.00</b>  | 612.00          | <b>3254</b> | 0           | 2   | 0 | 18  | 5   | 25           | 51   | 177  | 8608 | 619.00   |
| p02_3070 | 75  | <b>2177.37</b> | 2253.00        | -           | 2153.00        | <b>2234.00</b>  | (3.6)       | 3           | 30  | 0 | 57  | 0   | 349          | 4080 | 2022 | 4694 | 2243.00  |
| p02_7090 | 75  | <b>3171.95</b> | 3233.00        | -           | 3163.00        | <b>3230.00</b>  | (2.1)       | 8           | 94  | 0 | 125 | 0   | 525          | 4357 | 2495 | 3618 | 3244.00  |
| p03_1030 | 100 | <b>1379.18</b> | 1542.00        | -           | 1357.00        | <b>1456.00</b>  | (6.8)       | 6           | 41  | 0 | 23  | 0   | 98           | 131  | 670  | 6428 | 1456.00  |
| p03_1050 | 100 | <b>1925.21</b> | 2053.00        | -           | 1889.00        | <b>2014.00</b>  | (6.2)       | 1           | 36  | 0 | 20  | 0   | 149          | 1060 | 1336 | 4616 | 2014.00  |
| p03_1090 | 100 | <b>3005.48</b> | 3152.00        | -           | 2965.00        | <b>3098.00</b>  | (4.3)       | 18          | 45  | 0 | 75  | 0   | 435          | 3183 | 2695 | 3927 | 3098.00  |
| p03_110  | 100 | 737.64         | 762.00         | -           | <b>744.00</b>  | <b>750.00</b>   | (0.8)       | 0           | 27  | 0 | 167 | 326 | 22           | 170  | 195  | 8206 | 789.00   |
| p03_3070 | 100 | <b>2909.22</b> | 3049.00        | -           | 2860.00        | <b>3001.00</b>  | (4.7)       | 23          | 61  | 0 | 30  | 0   | 273          | 3173 | 2413 | 4579 | 3001.00  |
| p03_7090 | 100 | <b>4251.65</b> | 4404.00        | -           | 4245.00        | <b>4368.00</b>  | (2.8)       | 16          | 65  | 3 | 39  | 0   | 563          | 4080 | 3289 | 4127 | 4368.00  |
| p04_1030 | 150 | -              | -              | -           | <b>1846.00</b> | <b>2034.00</b>  | (9.2)       | 1           | 23  | 0 | 5   | 0   | 86           | 421  | 1791 | 4770 | 2034.00  |
| p04_1050 | 150 | -              | -              | -           | <b>2639.00</b> | <b>2860.00</b>  | (7.7)       | 1           | 31  | 0 | 4   | 0   | 104          | 580  | 1735 | 3714 | 2860.00  |
| p04_1090 | 150 | -              | -              | -           | <b>4299.00</b> | <b>4573.00</b>  | (6.0)       | 1           | 47  | 0 | 0   | 0   | 192          | 448  | 1386 | 2617 | 4573.00  |
| p04_110  | 150 | -              | -              | -           | <b>889.00</b>  | <b>947.00</b>   | (6.1)       | 0           | 23  | 0 | 108 | 0   | 13           | 39   | 203  | 2344 | 947.00   |
| p04_3070 | 150 | -              | -              | -           | <b>4062.00</b> | <b>4416.00</b>  | (8.0)       | 1           | 61  | 0 | 2   | 0   | 158          | 464  | 1289 | 2519 | 4416.00  |
| p04_7090 | 150 | -              | -              | -           | <b>6113.00</b> | <b>6420.00</b>  | (4.8)       | 26          | 68  | 0 | 15  | 0   | 425          | 1361 | 1711 | 3166 | 6420.00  |
| p05_1030 | 199 | -              | -              | -           | <b>2194.51</b> | <b>2480.00</b>  | (11.5)      | 0           | 0   | 0 | 0   | 0   | 75           | 415  | 2535 | 5168 | 2480.00  |
| p05_1050 | 199 | -              | -              | -           | <b>3178.00</b> | <b>3510.00</b>  | (9.5)       | 13          | 21  | 0 | 0   | 0   | 138          | 980  | 1419 | 2388 | 3510.00  |
| p05_1090 | 199 | -              | -              | -           | <b>5167.00</b> | <b>5579.00</b>  | (7.4)       | 0           | 9   | 0 | 0   | 0   | 213          | 1084 | 1911 | 3150 | 5580.00  |
| p05_110  | 199 | -              | -              | -           | <b>1015.00</b> | <b>1126.00</b>  | (9.9)       | 1           | 26  | 0 | 23  | 0   | 32           | 63   | 336  | 3186 | 1126.00  |
| p05_3070 | 199 | -              | -              | -           | <b>5041.00</b> | <b>5484.00</b>  | (8.1)       | 0           | 33  | 0 | 0   | 0   | 210          | 924  | 1711 | 2948 | 5486.00  |
| p05_7090 | 199 | -              | -              | -           | <b>7807.00</b> | <b>8206.00</b>  | (4.9)       | 15          | 25  | 0 | 0   | 0   | 589          | 741  | 1233 | 2036 | 8206.00  |
| p10_1030 | 199 | -              | -              | -           | <b>2194.51</b> | <b>2480.00</b>  | (11.5)      | 0           | 0   | 0 | 0   | 0   | 75           | 415  | 2535 | 5168 | 2480.00  |
| p10_1050 | 199 | -              | -              | -           | <b>3178.00</b> | <b>3510.00</b>  | (9.5)       | 11          | 21  | 0 | 0   | 0   | 138          | 980  | 1419 | 2388 | 3510.00  |
| p10_1090 | 199 | -              | -              | -           | <b>5167.00</b> | <b>5579.00</b>  | (7.4)       | 3           | 19  | 0 | 0   | 0   | 213          | 1087 | 1913 | 3152 | 5580.00  |
| p10_110  | 199 | -              | -              | -           | <b>1015.00</b> | <b>1126.00</b>  | (9.9)       | 0           | 23  | 0 | 17  | 0   | 32           | 63   | 336  | 3186 | 1126.00  |
| p10_3070 | 199 | -              | -              | -           | <b>5041.00</b> | <b>5484.00</b>  | (8.1)       | 0           | 27  | 0 | 0   | 0   | 210          | 924  | 1711 | 2948 | 5486.00  |
| p10_7090 | 199 | -              | -              | -           | <b>7807.00</b> | <b>8206.00</b>  | (4.9)       | 14          | 26  | 0 | 0   | 0   | 589          | 741  | 1233 | 2036 | 8206.00  |
| p11_1030 | 120 | -              | -              | -           | <b>2791.00</b> | <b>2976.00</b>  | (6.2)       | 0           | 82  | 0 | 13  | 0   | 62           | 351  | 1726 | 3793 | 2976.00  |
| p11_1050 | 120 | -              | -              | -           | <b>4089.00</b> | <b>4296.00</b>  | (4.8)       | 1           | 200 | 0 | 7   | 0   | 124          | 1349 | 1542 | 3690 | 4296.00  |
| p11_1090 | 120 | -              | -              | -           | <b>6673.00</b> | <b>6982.00</b>  | (4.4)       | 5           | 111 | 0 | 8   | 0   | 341          | 3427 | 3127 | 3567 | 6982.00  |
| p11_110  | 120 | -              | -              | -           | <b>1013.00</b> | <b>1032.00</b>  | (1.8)       | 0           | 103 | 0 | 407 | 70  | 54           | 1136 | 906  | 4681 | 1032.00  |
| p11_3070 | 120 | -              | -              | -           | <b>6436.00</b> | <b>6663.00</b>  | (3.4)       | 19          | 88  | 1 | 5   | 0   | 188          | 1712 | 2106 | 2883 | 6663.00  |
| p11_7090 | 120 | -              | -              | -           | <b>9922.00</b> | <b>10193.00</b> | (2.7)       | 17          | 96  | 1 | 7   | 0   | 726          | 2876 | 2731 | 3028 | 10193.00 |

**Table EC.10 Branch-and-cut results for the SDVRP with unlimited fleet and non-rounded costs, part 1/2**

| instance | C   | BK              |                 |             | BC              |                |             | # lazy cons |    |   |     |     | # fract cuts |      |      |       | hour     |
|----------|-----|-----------------|-----------------|-------------|-----------------|----------------|-------------|-------------|----|---|-----|-----|--------------|------|------|-------|----------|
|          |     | LB              | UB              | time        | LB              | UB             | time (gap)  | SY          | SE | Y | R   | F   | SY           | SE   | Y    | R     |          |
| S101D1   | 100 | 716.92          | 726.59          | -           | <b>726.59</b>   | 726.59         | <b>3318</b> | 0           | 22 | 0 | 191 | 110 | 7            | 138  | 122  | 5419  | 768.72   |
| S101D2   | 100 | <b>1356.78</b>  | <b>1378.43</b>  | -           | 1296.13         | 1394.67        | (7.1)       | 0           | 6  | 0 | 56  | 0   | 31           | 72   | 406  | 6711  | 1394.67  |
| S101D3   | 100 | <b>1845.07</b>  | <b>1874.81</b>  | -           | 1784.59         | 1921.54        | (7.1)       | 0           | 4  | 1 | 75  | 0   | 89           | 82   | 718  | 7063  | 1921.59  |
| S101D5   | 100 | <b>2758.21</b>  | <b>2791.22</b>  | -           | 2687.48         | 2816.49        | (4.6)       | 8           | 8  | 1 | 66  | 0   | 87           | 149  | 1007 | 5854  | 2816.86  |
| S51D1    | 50  | 459.50          | 459.50          | <b>13</b>   | 459.50          | 459.50         | 17          | 0           | 0  | 0 | 13  | 0   | 5            | 9    | 40   | 195   | 472.61   |
| S51D2    | 50  | 708.42          | 708.42          | 2376        | 708.42          | 708.42         | <b>248</b>  | 0           | 3  | 0 | 25  | 8   | 17           | 24   | 129  | 2263  | 711.42   |
| S51D3    | 50  | 947.97          | 947.97          | 20738       | 947.97          | 947.97         | <b>1486</b> | 0           | 0  | 0 | 105 | 0   | 72           | 25   | 147  | 3195  | 957.14   |
| S51D4    | 50  | 1560.88         | 1560.88         | <b>3827</b> | 1560.88         | 1560.88        | 3860        | 0           | 3  | 0 | 67  | 9   | 153          | 31   | 505  | 3232  | 1569.81  |
| S51D5    | 50  | <b>1333.67</b>  | 1333.67         | <b>6310</b> | 1329.62         | 1333.67        | (0.3)       | 2           | 1  | 0 | 200 | 0   | 58           | 48   | 355  | 4544  | 1348.19  |
| S51D6    | 50  | 2169.10         | 2169.10         | 16755       | 2169.10         | 2169.10        | <b>6414</b> | 7           | 7  | 4 | 87  | 0   | 304          | 322  | 941  | 2273  | 2191.75  |
| S76D1    | 75  | 598.94          | 598.94          | 563         | 598.94          | 598.94         | <b>88</b>   | 0           | 2  | 0 | 11  | 0   | 3            | 18   | 79   | 1744  | 613.99   |
| S76D2    | 75  | <b>1066.88</b>  | <b>1087.40</b>  | -           | 1044.45         | 1098.92        | (5.0)       | 0           | 3  | 0 | 86  | 0   | 38           | 89   | 266  | 10587 | 1098.92  |
| S76D3    | 75  | <b>1406.85</b>  | <b>1427.86</b>  | -           | 1385.89         | 1438.24        | (3.6)       | 2           | 2  | 0 | 132 | 0   | 257          | 97   | 445  | 10349 | 1438.24  |
| S76D4    | 75  | <b>2053.66</b>  | <b>2079.76</b>  | -           | 2046.84         | 2088.79        | (2.0)       | 1           | 1  | 0 | 206 | 0   | 478          | 132  | 1868 | 5863  | 2101.76  |
| SD1      | 8   | 228.28          | 228.28          | 0           | 228.28          | 228.28         | 0           | 0           | 0  | 0 | 0   | 0   | 4            | 0    | 19   | 18    | 240.00   |
| SD10     | 64  | <b>2684.86</b>  | 2684.88         | <b>1903</b> | 2667.57         | 2684.88        | (0.6)       | 4           | 11 | 0 | 36  | 0   | 202          | 2034 | 1195 | 3503  | 2746.57  |
| SD11     | 80  | 13280.00        | 13280.00        | 1340        | 13280.00        | 13280.00       | <b>122</b>  | 0           | 23 | 0 | 19  | 0   | 232          | 200  | 655  | 1069  | 13340.00 |
| SD12     | 80  | 7135.27         | 7270.87         | -           | <b>7159.98</b>  | <b>7242.17</b> | (1.1)       | 15          | 25 | 1 | 75  | 0   | 433          | 3984 | 2298 | 5028  | 7242.17  |
| SD13     | 96  | 9992.74         | <b>10110.58</b> | -           | <b>10035.20</b> | 10110.60       | (0.7)       | 4           | 54 | 0 | 47  | 0   | 582          | 2840 | 2362 | 4695  | 10230.20 |
| SD14     | 120 | <b>10502.76</b> | <b>10754.70</b> | -           | 10487.90        | 10849.10       | (3.3)       | 34          | 32 | 1 | 19  | 0   | 369          | 1931 | 1833 | 4005  | 10849.10 |
| SD15     | 144 | <b>14787.05</b> | <b>15151.10</b> | -           | 14755.40        | 15342.60       | (3.8)       | 14          | 31 | 1 | 7   | 0   | 501          | 1302 | 2002 | 3907  | 15342.60 |
| SD16     | 144 | <b>3379.33</b>  | <b>3379.33</b>  | <b>9772</b> | 3349.78         | 3467.84        | (3.4)       | 10          | 29 | 1 | 28  | 0   | 143          | 252  | 1134 | 3707  | 3467.84  |
| SD17     | 160 | 26166.80        | <b>26547.44</b> | -           | <b>26226.00</b> | 26798.50       | (2.1)       | 8           | 36 | 0 | 0   | 0   | 669          | 1156 | 2031 | 4093  | 26798.50 |
| SD18     | 160 | <b>13892.74</b> | <b>14334.03</b> | -           | 13808.00        | 14438.30       | (4.4)       | 21          | 53 | 0 | 7   | 0   | 492          | 750  | 1467 | 2965  | 14438.30 |
| SD19     | 192 | <b>19584.84</b> | <b>20191.20</b> | -           | 19457.50        | 20562.10       | (5.4)       | 2           | 20 | 0 | 0   | 0   | 556          | 1503 | 1932 | 3755  | 20562.10 |
| SD2      | 16  | 708.28          | 708.28          | <b>0</b>    | 708.28          | 708.28         | 1           | 0           | 0  | 0 | 0   | 0   | 28           | 8    | 27   | 37    | 708.28   |
| SD20     | 240 | <b>38901.37</b> | <b>39840.00</b> | -           | 38734.90        | 40375.30       | (4.1)       | 0           | 0  | 0 | 0   | 0   | 913          | 1497 | 2189 | 4182  | 40375.30 |
| SD21     | 288 | <b>11254.83</b> | <b>11271.10</b> | -           | 10971.40        | 11592.60       | (5.4)       | 0           | 0  | 0 | 0   | 0   | 919          | 721  | 2066 | 3099  | 11592.60 |
| SD3      | 16  | 430.58          | 430.58          | <b>0</b>    | 430.58          | 430.58         | 2           | 0           | 0  | 0 | 0   | 0   | 15           | 0    | 36   | 54    | 430.58   |
| SD4      | 24  | 631.05          | 631.05          | <b>1</b>    | 631.05          | 631.05         | 4           | 0           | 0  | 0 | 0   | 0   | 30           | 0    | 73   | 85    | 633.44   |
| SD5      | 32  | 1390.57         | 1390.57         | 51          | 1390.57         | 1390.57        | <b>5</b>    | 0           | 0  | 0 | 0   | 0   | 46           | 16   | 194  | 298   | 1390.57  |
| SD6      | 32  | 831.24          | 831.24          | 4           | 831.24          | 831.24         | 4           | 0           | 0  | 0 | 0   | 0   | 36           | 2    | 144  | 291   | 831.24   |
| SD7      | 40  | 3640.00         | 3640.00         | 55          | 3640.00         | 3640.00        | <b>4</b>    | 0           | 0  | 0 | 0   | 0   | 90           | 58   | 174  | 226   | 3640.00  |
| SD8      | 48  | 5068.28         | 5068.28         | 72          | 5068.28         | 5068.28        | <b>7</b>    | 0           | 24 | 0 | 9   | 0   | 97           | 103  | 255  | 335   | 5068.28  |
| SD9      | 48  | 2044.20         | 2044.20         | 267         | 2044.20         | 2044.20        | <b>114</b>  | 0           | 7  | 0 | 29  | 0   | 108          | 184  | 278  | 902   | 2078.86  |
| eil22    | 21  | 375.28          | 375.28          | 6           | 375.28          | 375.28         | <b>2</b>    | 0           | 0  | 0 | 0   | 0   | 4            | 3    | 43   | 109   | 375.28   |
| eil23    | 22  | 568.56          | 568.56          | 1           | 568.56          | 568.56         | 1           | 0           | 0  | 0 | 0   | 0   | 9            | 3    | 14   | 18    | 568.56   |
| eil30    | 29  | 505.01          | 505.01          | <b>2</b>    | 505.01          | 505.01         | 3           | 0           | 0  | 0 | 0   | 0   | 3            | 10   | 42   | 55    | 505.01   |
| eil33    | 32  | 837.06          | 837.06          | 46          | 837.06          | 837.06         | <b>7</b>    | 0           | 1  | 0 | 6   | 20  | 10           | 15   | 107  | 320   | 837.06   |
| eil51    | 50  | 524.61          | 524.61          | 95          | 524.61          | 524.61         | <b>16</b>   | 0           | 0  | 0 | 4   | 0   | 2            | 7    | 68   | 729   | 527.67   |
| eilA101  | 100 | 804.40          | <b>826.14</b>   | -           | <b>815.00</b>   | 835.79         | (2.5)       | 0           | 9  | 0 | 109 | 102 | 123          | 115  | 221  | 11076 | 835.79   |
| eilA76   | 75  | <b>809.58</b>   | <b>823.89</b>   | -           | 805.25          | 828.75         | (2.8)       | 0           | 7  | 0 | 107 | 31  | 32           | 96   | 166  | 9369  | 834.12   |
| eilB101  | 100 | <b>1055.59</b>  | <b>1076.26</b>  | -           | 1023.72         | 1088.19        | (5.9)       | 1           | 9  | 0 | 137 | 0   | 117          | 48   | 169  | 5076  | 1088.19  |
| eilB76   | 75  | <b>984.13</b>   | <b>1009.04</b>  | -           | 962.02          | 1015.83        | (5.3)       | 0           | 6  | 0 | 125 | 1   | 70           | 131  | 229  | 9675  | 1015.83  |
| eilC76   | 75  | 722.76          | 738.67          | -           | <b>728.73</b>   | 738.67         | (1.3)       | 0           | 5  | 0 | 77  | 57  | 19           | 79   | 130  | 9574  | 747.83   |
| eilD76   | 75  | 674.17          | <b>687.60</b>   | -           | <b>681.31</b>   | 690.17         | (1.3)       | 0           | 1  | 0 | 39  | 7   | 13           | 80   | 123  | 10800 | 692.66   |

Table EC.11 Branch-and-cut results for the SDVRP with unlimited fleet and non-rounded costs, part 2/2

| instance | C   | BK              |                |              | BC             |                 |             | # lazy cons |    |    |     |     | # fract cuts |      |      |       | heur     |
|----------|-----|-----------------|----------------|--------------|----------------|-----------------|-------------|-------------|----|----|-----|-----|--------------|------|------|-------|----------|
|          |     | LB              | UB             | time         | LB             | UB              | time (gap)  | SY          | SE | Y  | R   | F   | SY           | SE   | Y    | R     |          |
| p01_1030 | 50  | 756.70          | 756.71         | 20494        | <b>756.71</b>  | 756.71          | <b>281</b>  | 0           | 2  | 0  | 38  | 3   | 55           | 14   | 111  | 2126  | 763.04   |
| p01_1050 | 50  | <b>1005.75</b>  | 1005.75        | <b>23257</b> | 998.04         | 1005.75         | (0.8)       | 7           | 2  | 0  | 106 | 0   | 59           | 65   | 173  | 5986  | 1016.84  |
| p01_1090 | 50  | 1487.18         | 1487.18        | 7155         | 1487.18        | 1487.18         | <b>1388</b> | 0           | 0  | 0  | 54  | 0   | 105          | 25   | 330  | 3000  | 1494.88  |
| p01_110  | 50  | 459.50          | 459.50         | <b>8</b>     | 459.50         | 459.50          | 12          | 0           | 0  | 0  | 8   | 0   | 5            | 10   | 51   | 230   | 464.64   |
| p01_3070 | 50  | <b>1481.71</b>  | 1481.71        | <b>12418</b> | 1473.52        | 1481.71         | (0.6)       | 0           | 1  | 0  | 128 | 0   | 168          | 61   | 432  | 6421  | 1497.66  |
| p01_7090 | 50  | 2155.80         | 2155.80        | 42587        | 2155.80        | 2155.80         | <b>7098</b> | 1           | 0  | 0  | 32  | 0   | 262          | 94   | 783  | 2446  | 2179.23  |
| p02_1030 | 75  | <b>1095.65</b>  | 1121.82        | -            | 1067.52        | <b>1119.73</b>  | (4.7)       | 0           | 22 | 0  | 164 | 136 | 52           | 163  | 265  | 10679 | 1124.12  |
| p02_1050 | 75  | <b>1482.50</b>  | 1514.39        | -            | 1461.17        | <b>1509.02</b>  | (3.2)       | 0           | 4  | 0  | 81  | 0   | 88           | 98   | 510  | 9764  | 1509.02  |
| p02_1090 | 75  | <b>2272.05</b>  | <b>2318.28</b> | -            | 2259.26        | 2329.53         | (3.0)       | 2           | 13 | 0  | 126 | 0   | 416          | 238  | 1766 | 6292  | 2330.61  |
| p02_110  | 75  | 612.45          | 617.85         | -            | <b>617.85</b>  | 617.85          | <b>5415</b> | 0           | 5  | 0  | 32  | 9   | 26           | 91   | 153  | 10496 | 635.21   |
| p02_3070 | 75  | <b>2190.16</b>  | <b>2237.19</b> | -            | 2172.76        | 2253.51         | (3.6)       | 4           | 11 | 0  | 86  | 0   | 224          | 278  | 1097 | 9406  | 2256.34  |
| p02_7090 | 75  | <b>3192.55</b>  | <b>3232.15</b> | -            | 3181.27        | 3237.92         | (1.7)       | 4           | 26 | 11 | 116 | 0   | 401          | 807  | 1748 | 4711  | 3253.97  |
| p03_1030 | 100 | <b>1437.78</b>  | <b>1477.35</b> | -            | 1369.50        | 1480.01         | (7.5)       | 3           | 7  | 0  | 90  | 0   | 40           | 62   | 484  | 7291  | 1480.01  |
| p03_1050 | 100 | <b>1971.34</b>  | 2040.92        | -            | 1898.68        | <b>2038.20</b>  | (6.8)       | 2           | 19 | 0  | 89  | 0   | 79           | 105  | 1074 | 7349  | 2038.20  |
| p03_1090 | 100 | <b>3042.93</b>  | 3127.06        | -            | 3001.04        | <b>3115.42</b>  | (3.7)       | 23          | 19 | 3  | 88  | 0   | 322          | 276  | 1740 | 5668  | 3115.54  |
| p03_110  | 100 | 749.42          | 769.42         | -            | <b>759.38</b>  | <b>760.00</b>   | (0.1)       | 0           | 3  | 0  | 28  | 0   | 3            | 82   | 126  | 7885  | 761.77   |
| p03_3070 | 100 | <b>2945.42</b>  | 3030.66        | -            | 2896.12        | <b>3026.71</b>  | (4.3)       | 15          | 18 | 2  | 106 | 0   | 275          | 314  | 1657 | 6422  | 3026.71  |
| p03_7090 | 100 | <b>4334.44</b>  | <b>4417.57</b> | -            | 4305.20        | 4436.99         | (3.0)       | 23          | 35 | 16 | 93  | 0   | 422          | 828  | 2186 | 4192  | 4437.00  |
| p04_1030 | 150 | <b>1986.34</b>  | 2066.46        | -            | 1876.92        | <b>2056.87</b>  | (8.7)       | 0           | 1  | 0  | 9   | 0   | 61           | 122  | 1021 | 8821  | 2056.87  |
| p04_1050 | 150 | <b>2811.98</b>  | 2917.80        | -            | 2699.47        | <b>2901.97</b>  | (7.0)       | 0           | 0  | 0  | 0   | 0   | 84           | 274  | 1770 | 10886 | 2901.97  |
| p04_1090 | 150 | <b>4474.92</b>  | 4665.87        | -            | 4388.76        | <b>4624.60</b>  | (5.1)       | 6           | 17 | 0  | 5   | 0   | 181          | 321  | 1558 | 5402  | 4624.60  |
| p04_110  | 150 | <b>895.46</b>   | <b>947.14</b>  | -            | 895.02         | 966.90          | (7.4)       | 0           | 14 | 0  | 121 | 0   | 15           | 33   | 137  | 2419  | 966.90   |
| p04_3070 | 150 | <b>4267.33</b>  | <b>4438.76</b> | -            | 4153.56        | 4455.14         | (6.8)       | 7           | 14 | 4  | 8   | 0   | 166          | 397  | 1487 | 4494  | 4455.14  |
| p04_7090 | 150 | <b>6284.76</b>  | 6482.19        | -            | 6216.65        | <b>6457.37</b>  | (3.7)       | 23          | 46 | 2  | 16  | 0   | 365          | 485  | 1746 | 3598  | 6458.23  |
| p05_1030 | 199 | <b>2423.99</b>  | 2583.29        | -            | 2254.17        | <b>2528.69</b>  | (10.9)      | 0           | 0  | 0  | 0   | 0   | 72           | 359  | 2236 | 7792  | 2528.69  |
| p05_1050 | 199 | <b>3420.23</b>  | 3568.25        | -            | 3244.54        | <b>3542.18</b>  | (8.4)       | 0           | 0  | 0  | 0   | 0   | 121          | 660  | 2911 | 9022  | 3542.18  |
| p05_1090 | 199 | <b>5422.95</b>  | 5673.18        | -            | 5257.30        | <b>5627.28</b>  | (6.6)       | 0           | 27 | 0  | 1   | 0   | 182          | 1033 | 1832 | 3096  | 5627.35  |
| p05_110  | 199 | <b>1042.37</b>  | 1148.27        | -            | 1028.84        | <b>1117.58</b>  | (7.9)       | 0           | 16 | 0  | 28  | 0   | 22           | 73   | 222  | 2828  | 1117.58  |
| p05_3070 | 199 | <b>5304.09</b>  | 5559.29        | -            | 5147.61        | <b>5505.91</b>  | (6.5)       | 0           | 14 | 0  | 6   | 0   | 181          | 1025 | 1867 | 3339  | 5506.85  |
| p05_7090 | 199 | <b>8062.14</b>  | 8359.65        | -            | 7937.06        | <b>8301.59</b>  | (4.4)       | 2           | 22 | 0  | 1   | 0   | 538          | 1117 | 1500 | 2584  | 8301.59  |
| p10_1030 | 199 | -               | -              | -            | <b>2254.17</b> | <b>2528.69</b>  | (10.9)      | 0           | 0  | 0  | 0   | 0   | 72           | 359  | 2236 | 7792  | 2528.69  |
| p10_1050 | 199 | -               | -              | -            | <b>3244.54</b> | <b>3542.18</b>  | (8.4)       | 0           | 0  | 0  | 0   | 0   | 121          | 660  | 2911 | 9022  | 3542.18  |
| p10_1090 | 199 | -               | -              | -            | <b>5257.30</b> | <b>5627.28</b>  | (6.6)       | 0           | 22 | 0  | 1   | 0   | 182          | 1033 | 1832 | 3096  | 5627.35  |
| p10_110  | 199 | -               | -              | -            | <b>1028.68</b> | <b>1117.58</b>  | (8.0)       | 0           | 15 | 0  | 24  | 0   | 21           | 71   | 222  | 2735  | 1117.58  |
| p10_3070 | 199 | -               | -              | -            | <b>5147.73</b> | <b>5505.94</b>  | (6.5)       | 0           | 12 | 0  | 8   | 0   | 181          | 1025 | 1867 | 3339  | 5506.90  |
| p10_7090 | 199 | -               | -              | -            | <b>7937.06</b> | <b>8301.59</b>  | (4.4)       | 5           | 25 | 0  | 0   | 0   | 538          | 1117 | 1500 | 2584  | 8301.59  |
| p11_1030 | 120 | <b>2867.79</b>  | <b>2983.82</b> | -            | 2844.93        | 3017.20         | (5.7)       | 0           | 11 | 0  | 90  | 0   | 41           | 185  | 1665 | 6082  | 3017.20  |
| p11_1050 | 120 | 4156.68         | <b>4259.94</b> | -            | <b>4168.03</b> | 4350.64         | (4.2)       | 0           | 9  | 0  | 111 | 0   | 72           | 270  | 1764 | 6234  | 4350.64  |
| p11_1090 | 120 | <b>6780.19</b>  | <b>6995.85</b> | -            | 6738.52        | 7173.25         | (6.1)       | 12          | 38 | 4  | 41  | 0   | 236          | 1059 | 1815 | 3518  | 7173.58  |
| p11_110  | 120 | 1023.39         | 1055.28        | -            | <b>1024.49</b> | <b>1049.30</b>  | (2.4)       | 0           | 44 | 0  | 572 | 18  | 50           | 565  | 744  | 3892  | 1049.30  |
| p11_3070 | 120 | <b>6593.28</b>  | 6822.31        | -            | 6542.85        | <b>6711.40</b>  | (2.5)       | 12          | 34 | 5  | 38  | 0   | 138          | 839  | 1712 | 3685  | 6713.78  |
| p11_7090 | 120 | <b>10113.55</b> | 10376.94       | -            | 10111.30       | <b>10342.90</b> | (2.2)       | 9           | 53 | 9  | 49  | 0   | 576          | 1446 | 2871 | 3418  | 10343.40 |

**Table EC.12 Comparison with/without heuristic for the MDS DVRP on instances from the literature.**

| $D_R$   | instance | $ C $ | $ D $ | BK       |          | BC       |            | BC - no heuristic |          |            |
|---------|----------|-------|-------|----------|----------|----------|------------|-------------------|----------|------------|
|         |          |       |       | UB       | LB       | UB       | time (gap) | LB                | UB       | time (gap) |
| [.1,.9] | mdsd1    | 50    | 4     | 1018.22  | 988.03   | 988.03   | 6534       | 988.03            | 988.03   | 4423       |
|         | mdsd2    | 75    | 5     | 1289.06  | 1249.19  | 1271.33  | (1.7)      | 1242.06           | 1335.06  | (7.0)      |
|         | mdsd3    | 100   | 2     | 2624.41  | 2444.27  | 2575.15  | (5.1)      | 2435.64           | 2709.52  | (10.1)     |
|         | mdsd4    | 100   | 2     | 2393.23  | 2222.92  | 2357.63  | (5.7)      | 2220.18           | 2558.99  | (13.2)     |
|         | mdsd5    | 100   | 3     | 1963.13  | 1838.94  | 1924.35  | (4.4)      | 1838.92           | -        | (nan)      |
|         | mdsd6    | 100   | 4     | 1963.68  | 1844.85  | 1903.48  | (3.1)      | 1840.95           | 2029.79  | (9.3)      |
|         | mdsd7    | 249   | 2     | 16096.91 | 14628.10 | 15938.10 | (8.2)      | 14650.20          | -        | (nan)      |
|         | mdsd8    | 249   | 3     | 13258.26 | 12068.70 | 13149.50 | (8.2)      | 12117.40          | -        | (nan)      |
|         | mdsd9    | 249   | 4     | 11959.27 | 10758.60 | 11730.20 | (8.3)      | 10768.10          | -        | (nan)      |
|         | mdsd10   | 249   | 5     | 11377.30 | 10424.20 | 11241.00 | (7.3)      | 10517.90          | -        | (nan)      |
| [.3,.7] | mdsd1    | 50    | 4     | 990.85   | 956.27   | 956.27   | 2871       | 956.27            | 956.27   | 2919       |
|         | mdsd2    | 75    | 5     | 1223.57  | 1162.18  | 1210.36  | (4.0)      | 1158.93           | 1249.53  | (7.3)      |
|         | mdsd3    | 100   | 2     | 2558.33  | 2388.33  | 2554.07  | (6.5)      | 2388.76           | 2678.84  | (10.8)     |
|         | mdsd4    | 100   | 2     | 2336.65  | 2178.54  | 2336.47  | (6.8)      | 2178.22           | -        | (nan)      |
|         | mdsd5    | 100   | 3     | 1871.47  | 1749.03  | 1852.82  | (5.6)      | 1739.57           | 1949.04  | (10.7)     |
|         | mdsd6    | 100   | 4     | 1887.48  | 1750.92  | 1849.02  | (5.3)      | 1752.30           | 2032.84  | (13.8)     |
|         | mdsd7    | 249   | 2     | 16136.07 | 14624.30 | 16165.20 | (9.5)      | 14776.00          | -        | (nan)      |
|         | mdsd8    | 249   | 3     | 13444.18 | 12172.70 | 13322.00 | (8.6)      | 12217.40          | -        | (nan)      |
|         | mdsd9    | 249   | 4     | 12176.61 | 10956.70 | 12054.00 | (9.1)      | 10956.70          | -        | (nan)      |
|         | mdsd10   | 249   | 5     | 11831.52 | 10519.40 | 11570.40 | (9.1)      | 10519.40          | -        | (nan)      |
| [.7,.9] | mdsd1    | 50    | 4     | 1344.99  | 1325.64  | 1325.64  | 537        | 1325.64           | 1325.64  | 290        |
|         | mdsd2    | 75    | 5     | 1705.98  | 1705.84  | 1705.84  | 1437       | 1705.84           | 1705.84  | 1326       |
|         | mdsd3    | 100   | 2     | 3878.34  | 3750.82  | 3890.69  | (3.6)      | 3757.28           | 3993.27  | (5.9)      |
|         | mdsd4    | 100   | 2     | 3525.24  | 3362.58  | 3501.13  | (4.0)      | 3363.18           | 3635.66  | (7.5)      |
|         | mdsd5    | 100   | 3     | 2772.58  | 2659.72  | 2731.22  | (2.6)      | 2659.16           | 2805.38  | (5.2)      |
|         | mdsd6    | 100   | 4     | 2696.47  | 2612.24  | 2654.70  | (1.6)      | 2607.55           | 2729.45  | (4.5)      |
|         | mdsd7    | 249   | 2     | 25502.49 | 23620.30 | 24915.40 | (5.2)      | 23652.30          | -        | (nan)      |
|         | mdsd8    | 249   | 3     | 20915.02 | 19410.60 | 20566.40 | (5.6)      | 19514.40          | -        | (nan)      |
|         | mdsd9    | 249   | 4     | 18844.77 | 17531.30 | 18516.40 | (5.3)      | 17528.90          | -        | (nan)      |
|         | mdsd10   | 249   | 5     | 17777.76 | 16620.20 | 17445.50 | (4.7)      | 16632.60          | -        | (nan)      |
| SQ      | sq1      | 32    | 2     | 1063.08  | 1052.58  | 1052.58  | 28         | 1052.58           | 1052.58  | 59         |
|         | sq2      | 48    | 3     | 1601.02  | 1578.87  | 1578.87  | 403        | 1578.87           | 1578.87  | 245        |
|         | sq5      | 64    | 2     | 3434.71  | 3394.32  | 3428.98  | (1.0)      | 3385.19           | 3459.07  | (2.1)      |
|         | sq3      | 64    | 4     | 2142.11  | 2098.47  | 2126.84  | (1.3)      | 2098.21           | 2134.30  | (1.7)      |
|         | sq4      | 80    | 5     | 2684.02  | 2622.64  | 2652.15  | (1.1)      | 2621.25           | 2700.10  | (2.9)      |
|         | sq9      | 96    | 2     | 7109.71  | 6906.32  | 7050.18  | (2.0)      | 6908.81           | 7180.97  | (3.8)      |
|         | sq6      | 96    | 3     | 5142.06  | 5045.43  | 5148.10  | (2.0)      | 5037.49           | 5446.51  | (7.5)      |
|         | sq7      | 128   | 4     | 6869.14  | 6680.95  | 6865.55  | (2.7)      | 6680.46           | 7211.35  | (7.4)      |
|         | sq10     | 144   | 3     | 10586.51 | 10242.90 | 10586.90 | (3.2)      | 10242.70          | 11102.30 | (7.7)      |
|         | sq8      | 160   | 5     | 8600.60  | 8321.34  | 8587.48  | (3.1)      | 8319.63           | 9005.93  | (7.6)      |
|         | sq11     | 192   | 4     | 14135.80 | 13496.00 | 14101.60 | (4.3)      | 13495.10          | 14928.50 | (9.6)      |
|         | sq12     | 240   | 5     | 17739.64 | 16884.70 | 17634.50 | (4.3)      | 16884.70          | 18581.20 | (9.1)      |

**Table EC.13 Comparison with/without heuristic for the MDTSP on instances from the literature.**

| type | instance | C   | D  | BK    |       |      | BC    |       |      | BC - no heur. |       |      |
|------|----------|-----|----|-------|-------|------|-------|-------|------|---------------|-------|------|
|      |          |     |    | LB    | UB    | time | LB    | UB    | time | LB            | UB    | time |
| BGS  | 100-5-1  | 100 | 5  | 1569  | 1569  | 117  | 1569  | 1569  | 9    | 1569          | 1569  | 5    |
|      | 100-5-2  | 100 | 5  | 1705  | 1705  | 1    | 1705  | 1705  | 2    | 1705          | 1705  | 1    |
|      | 100-5-3  | 100 | 5  | 1553  | 1553  | 58   | 1553  | 1553  | 14   | 1553          | 1553  | 8    |
|      | 100-10-1 | 100 | 10 | 1524  | 1524  | 20   | 1524  | 1524  | 6    | 1524          | 1524  | 5    |
|      | 100-10-2 | 100 | 10 | 1702  | 1702  | 2    | 1702  | 1702  | 3    | 1702          | 1702  | 1    |
|      | 100-10-3 | 100 | 10 | 1530  | 1530  | 124  | 1530  | 1530  | 13   | 1530          | 1530  | 9    |
|      | 100-20-1 | 100 | 20 | 1509  | 1509  | 5    | 1509  | 1509  | 18   | 1509          | 1509  | 5    |
|      | 100-20-2 | 100 | 20 | 1695  | 1695  | 9    | 1695  | 1695  | 4    | 1695          | 1695  | 4    |
|      | 100-20-3 | 100 | 20 | 1494  | 1494  | 14   | 1494  | 1494  | 10   | 1494          | 1494  | 16   |
|      | 200-10-1 | 200 | 10 | 2266  | 2266  | 5997 | 2266  | 2266  | 60   | 2266          | 2266  | 40   |
|      | 200-20-1 | 200 | 20 | 2250  | 2250  | 1110 | 2250  | 2250  | 53   | 2250          | 2250  | 466  |
|      | 200-40-1 | 200 | 40 | 2211  | 2211  | 8134 | 2211  | 2211  | 244  | 2211          | 2211  | 205  |
|      | 300-10-1 | 300 | 10 | 2675  | 2826  | -    | 2700  | 2700  | 219  | 2700          | 2700  | 692  |
|      | 300-20-1 | 300 | 20 | 2666  | 2870  | -    | 2687  | 2687  | 320  | 2687          | 2687  | 397  |
|      | 300-30-1 | 300 | 30 | 2664  | 2717  | -    | 2679  | 2679  | 155  | 2679          | 2679  | 452  |
|      | 300-40-1 | 300 | 40 | 2662  | 2693  | -    | 2676  | 2676  | 397  | 2676          | 2676  | 879  |
|      | 300-60-1 | 300 | 60 | 2650  | 2729  | -    | 2665  | 2665  | 625  | 2665          | 2665  | 6525 |
| BM   | 100-5-1  | 100 | 5  | 37943 | 37943 | 13   | 37943 | 37943 | 17   | 37943         | 37943 | 5    |
|      | 100-5-2  | 100 | 5  | 30832 | 30832 | 2    | 30832 | 30832 | 2    | 30832         | 30832 | 1    |
|      | 100-5-3  | 100 | 5  | 32850 | 32850 | 8    | 32850 | 32850 | 5    | 32850         | 32850 | 3    |
|      | 100-10-1 | 100 | 10 | 39608 | 39608 | 8    | 39608 | 39608 | 4    | 39608         | 39608 | 2    |
|      | 100-10-2 | 100 | 10 | 30641 | 30641 | 9    | 30641 | 30641 | 5    | 30641         | 30641 | 3    |
|      | 100-10-3 | 100 | 10 | 32521 | 32521 | 1    | 32521 | 32521 | 3    | 32521         | 32521 | 2    |
|      | 200-10-1 | 200 | 10 | 53047 | 53047 | 123  | 53047 | 53047 | 47   | 53047         | 53047 | 50   |
|      | 200-10-2 | 200 | 10 | 39663 | 39663 | 305  | 39663 | 39663 | 137  | 39663         | 39663 | 150  |
|      | 200-10-3 | 200 | 10 | 45289 | 45289 | 83   | 45289 | 45289 | 70   | 45289         | 45289 | 39   |

Table EC.14 Comparison with/without heuristic for the SDVRP with limited fleet and rounded costs, part 1/2

| instance | C   | BK       |          |      | BC       |          |            | BC - no heur. |          |            |
|----------|-----|----------|----------|------|----------|----------|------------|---------------|----------|------------|
|          |     | LB       | UB       | time | LB       | UB       | time (gap) | LB            | UB       | time (gap) |
| S101D1   | 100 | 716.00   | 716.00   | 3125 | 716.00   | 716.00   | 2919       | 716.00        | 716.00   | 5598       |
| S101D2   | 100 | 1337.10  | 1366.00  | -    | 1276.00  | 1374.00  | (7.1)      | 1274.00       | -        | (nan)      |
| S101D3   | 100 | 1832.20  | 1864.00  | -    | 1773.00  | 1895.00  | (6.4)      | 1770.00       | -        | (nan)      |
| S101D5   | 100 | 2737.10  | 2770.00  | -    | 2676.00  | 2823.00  | (5.2)      | 2675.00       | -        | (nan)      |
| S51D1    | 50  | 458.00   | 458.00   | 0    | 458.00   | 458.00   | 11         | 458.00        | 458.00   | 1          |
| S51D2    | 50  | 703.00   | 703.00   | 800  | 703.00   | 703.00   | 266        | 703.00        | 703.00   | 276        |
| S51D3    | 50  | 935.17   | 942.00   | -    | 942.00   | 942.00   | 1019       | 942.00        | 942.00   | 1136       |
| S51D4    | 50  | 1551.00  | 1551.00  | 2102 | 1551.00  | 1551.00  | 1174       | 1551.00       | 1551.00  | 1999       |
| S51D5    | 50  | 1325.34  | 1328.00  | -    | 1318.00  | 1328.00  | (0.8)      | 1312.00       | 1328.00  | (1.2)      |
| S51D6    | 50  | 2153.00  | 2153.00  | 4619 | 2148.00  | 2153.00  | (0.2)      | 2141.00       | 2164.00  | (1.1)      |
| S76D1    | 75  | 592.00   | 592.00   | 30   | 592.00   | 592.00   | 73         | 592.00        | 592.00   | 193        |
| S76D2    | 75  | 1061.10  | 1082.00  | -    | 1044.00  | 1089.00  | (4.1)      | 1038.00       | -        | (nan)      |
| S76D3    | 75  | 1395.90  | 1420.00  | -    | 1375.00  | 1434.00  | (4.1)      | 1370.00       | 1476.00  | (7.2)      |
| S76D4    | 75  | 2046.10  | 2073.00  | -    | 2029.00  | 2097.00  | (3.2)      | 2023.00       | 2109.00  | (4.1)      |
| SD1      | 8   | 228.00   | 228.00   | 0    | 228.00   | 228.00   | 1          | 228.00        | 228.00   | 0          |
| SD10     | 64  | 2688.00  | 2688.00  | 2577 | 2677.00  | 2688.00  | (0.4)      | 2680.00       | 2688.00  | (0.3)      |
| SD11     | 80  | 13280.00 | 13280.00 | 5241 | 13280.00 | 13280.00 | 107        | 13280.00      | 13280.00 | 881        |
| SD12     | 80  | 7102.36  | 7315.00  | -    | 7178.00  | 7216.00  | (0.5)      | 7173.00       | 7232.00  | (0.8)      |
| SD13     | 96  | 9933.21  | -        | -    | 10023.00 | 10188.00 | (1.6)      | 10021.00      | 10121.00 | (1.0)      |
| SD14     | 120 | -        | -        | -    | 10493.00 | 10889.00 | (3.6)      | 10493.00      | -        | (nan)      |
| SD15     | 144 | -        | -        | -    | 14738.00 | 15230.00 | (3.2)      | 14737.00      | -        | (nan)      |
| SD16     | 144 | -        | -        | -    | 3384.00  | 3496.00  | (3.2)      | 3359.00       | -        | (nan)      |
| SD17     | 160 | -        | -        | -    | 26198.00 | 26875.00 | (2.5)      | 26198.00      | -        | (nan)      |
| SD18     | 160 | -        | -        | -    | 13833.00 | 14534.00 | (4.8)      | 13834.00      | -        | (nan)      |
| SD19     | 192 | -        | -        | -    | 19465.00 | 20481.00 | (5.0)      | 19465.00      | -        | (nan)      |
| SD2      | 16  | 708.00   | 708.00   | 0    | 708.00   | 708.00   | 1          | 708.00        | 708.00   | 0          |
| SD20     | 240 | -        | -        | -    | 38725.80 | 41046.00 | (5.7)      | 38733.60      | -        | (nan)      |
| SD21     | 288 | -        | -        | -    | 10887.60 | 11655.00 | (6.6)      | 10886.10      | -        | (nan)      |
| SD3      | 16  | 432.00   | 432.00   | 0    | 432.00   | 432.00   | 1          | 432.00        | 432.00   | 0          |
| SD4      | 24  | 630.00   | 630.00   | 0    | 630.00   | 630.00   | 1          | 630.00        | 630.00   | 0          |
| SD5      | 32  | 1392.00  | 1392.00  | 11   | 1392.00  | 1392.00  | 5          | 1392.00       | 1392.00  | 2          |
| SD6      | 32  | 832.00   | 832.00   | 1    | 832.00   | 832.00   | 3          | 832.00        | 832.00   | 2          |
| SD7      | 40  | 3640.00  | 3640.00  | 2    | 3640.00  | 3640.00  | 3          | 3640.00       | 3640.00  | 1          |
| SD8      | 48  | 5068.00  | 5068.00  | 19   | 5068.00  | 5068.00  | 8          | 5068.00       | 5068.00  | 5          |
| SD9      | 48  | 2046.00  | 2046.00  | 126  | 2046.00  | 2046.00  | 80         | 2046.00       | 2046.00  | 167        |
| eil22    | 21  | 375.00   | 375.00   | 0    | 375.00   | 375.00   | 2          | 375.00        | 375.00   | 0          |
| eil23    | 22  | 569.00   | 569.00   | 0    | 569.00   | 569.00   | 1          | 569.00        | 569.00   | 0          |
| eil30    | 29  | 510.00   | 510.00   | 14   | 510.00   | 510.00   | 7          | 510.00        | 510.00   | 3          |
| eil33    | 32  | 835.00   | 835.00   | 2    | 835.00   | 835.00   | 5          | 835.00        | 835.00   | 1          |
| eil51    | 50  | 521.00   | 521.00   | 36   | 521.00   | 521.00   | 26         | 521.00        | 521.00   | 9          |
| eilA101  | 100 | 799.80   | 814.00   | -    | 807.00   | 818.00   | (1.3)      | 804.00        | 817.00   | (1.6)      |
| eilA76   | 75  | 807.60   | 818.00   | -    | 800.00   | 829.00   | (3.5)      | 794.00        | 936.00   | (15.2)     |
| eilB101  | 100 | 1040.60  | 1061.00  | -    | 1011.00  | 1071.00  | (5.6)      | 1013.00       | -        | (nan)      |
| eilB76   | 75  | 981.40   | 1002.00  | -    | 958.00   | 1012.00  | (5.3)      | 958.00        | 1020.00  | (6.1)      |
| eilC76   | 75  | 717.80   | 733.00   | -    | 724.00   | 733.00   | (1.2)      | 721.00        | 734.00   | (1.8)      |
| eilD76   | 75  | 666.10   | 682.00   | -    | 679.00   | 679.00   | 1670       | 674.00        | 682.00   | (1.2)      |

Table EC.15 Comparison with/without heuristic for the SDVRP with limited fleet and rounded costs, part 2/2

| instance | C   | BK      |         |      | BC      |          |            | BC - no heur. |         |            |
|----------|-----|---------|---------|------|---------|----------|------------|---------------|---------|------------|
|          |     | LB      | UB      | time | LB      | UB       | time (gap) | LB            | UB      | time (gap) |
| p01_1030 | 50  | 753.00  | 753.00  | 6098 | 753.00  | 753.00   | 570        | 753.00        | 753.00  | 578        |
| p01_1050 | 50  | 993.38  | 998.00  | -    | 993.00  | 998.00   | (0.5)      | 990.00        | 998.00  | (0.8)      |
| p01_1090 | 50  | 1480.00 | 1480.00 | 5368 | 1480.00 | 1480.00  | 6017       | 1477.00       | 1480.00 | (0.2)      |
| p01_110  | 50  | 458.00  | 458.00  | 1    | 458.00  | 458.00   | 16         | 458.00        | 458.00  | 1          |
| p01_3070 | 50  | 1473.00 | 1473.00 | 5355 | 1460.00 | 1479.00  | (1.3)      | 1453.00       | 1478.00 | (1.7)      |
| p01_7090 | 50  | 2137.98 | 2142.00 | -    | 2133.00 | 2143.00  | (0.5)      | 2132.00       | 2145.00 | (0.6)      |
| p02_1030 | 75  | 1059.86 | 1157.00 | -    | 1060.00 | 1117.00  | (5.1)      | 1054.00       | 1155.00 | (8.7)      |
| p02_1050 | 75  | 1449.11 | -       | -    | 1451.00 | 1498.00  | (3.1)      | 1448.00       | 1538.00 | (5.9)      |
| p02_1090 | 75  | 2241.79 | -       | -    | 2244.00 | 2305.00  | (2.6)      | 2241.00       | 2330.00 | (3.8)      |
| p02_110  | 75  | 612.00  | 612.00  | 4284 | 612.00  | 612.00   | 2706       | 612.00        | 612.00  | 4766       |
| p02_3070 | 75  | 2166.59 | 2431.00 | -    | 2154.00 | 2224.00  | (3.1)      | 2151.00       | -       | (nan)      |
| p02_7090 | 75  | 3155.61 | -       | -    | 3157.00 | 3252.00  | (2.9)      | 3164.00       | 3395.00 | (6.8)      |
| p03_1030 | 100 | 1379.00 | -       | -    | 1352.00 | 1450.00  | (6.8)      | 1352.00       | -       | (nan)      |
| p03_1050 | 100 | 1914.80 | -       | -    | 1890.00 | 2013.00  | (6.1)      | 1885.00       | -       | (nan)      |
| p03_1090 | 100 | 2994.36 | -       | -    | 2964.00 | 3098.00  | (4.3)      | 2968.00       | -       | (nan)      |
| p03_110  | 100 | 740.76  | 760.00  | -    | 747.00  | 749.00   | (0.3)      | 744.00        | 751.00  | (0.9)      |
| p03_3070 | 100 | 2894.75 | -       | -    | 2855.00 | 3006.00  | (5.0)      | 2854.00       | -       | (nan)      |
| p03_7090 | 100 | 4269.98 | -       | -    | 4249.00 | 4385.00  | (3.1)      | 4250.00       | -       | (nan)      |
| p04_1030 | 150 | -       | -       | -    | 1843.00 | 2041.00  | (9.7)      | 1844.00       | -       | (nan)      |
| p04_1050 | 150 | -       | -       | -    | 2646.00 | 2856.00  | (7.4)      | 2648.00       | -       | (nan)      |
| p04_1090 | 150 | -       | -       | -    | 4289.00 | 4573.00  | (6.2)      | 4290.00       | -       | (nan)      |
| p04_110  | 150 | -       | -       | -    | 890.00  | 926.00   | (3.9)      | 891.00        | -       | (nan)      |
| p04_3070 | 150 | -       | -       | -    | 4098.00 | 4433.00  | (7.6)      | 4099.00       | -       | (nan)      |
| p04_7090 | 150 | -       | -       | -    | 6125.00 | 6447.00  | (5.0)      | 6127.00       | -       | (nan)      |
| p05_1030 | 199 | -       | -       | -    | 2226.00 | 2475.00  | (10.1)     | 2226.00       | -       | (nan)      |
| p05_1050 | 199 | -       | -       | -    | 3179.00 | 3545.00  | (10.3)     | 3179.00       | -       | (nan)      |
| p05_1090 | 199 | -       | -       | -    | 5182.00 | 5602.00  | (7.5)      | 5183.00       | -       | (nan)      |
| p05_110  | 199 | -       | -       | -    | 1015.00 | 1089.00  | (6.8)      | 1016.00       | -       | (nan)      |
| p05_3070 | 199 | -       | -       | -    | 5069.00 | 5520.00  | (8.2)      | 5070.00       | -       | (nan)      |
| p05_7090 | 199 | -       | -       | -    | 7832.00 | 8213.00  | (4.6)      | 7833.00       | -       | (nan)      |
| p10_1030 | 199 | -       | -       | -    | 2226.00 | 2475.00  | (10.1)     | 2226.00       | -       | (nan)      |
| p10_1050 | 199 | -       | -       | -    | 3179.00 | 3545.00  | (10.3)     | 3179.00       | -       | (nan)      |
| p10_1090 | 199 | -       | -       | -    | 5183.00 | 5602.00  | (7.5)      | 5183.00       | -       | (nan)      |
| p10_110  | 199 | -       | -       | -    | 1015.00 | 1089.00  | (6.8)      | 1016.00       | -       | (nan)      |
| p10_3070 | 199 | -       | -       | -    | 5069.00 | 5520.00  | (8.2)      | 5070.00       | -       | (nan)      |
| p10_7090 | 199 | -       | -       | -    | 7832.00 | 8213.00  | (4.6)      | 7833.00       | -       | (nan)      |
| p11_1030 | 120 | -       | -       | -    | 2788.00 | 3009.00  | (7.3)      | 2789.00       | -       | (nan)      |
| p11_1050 | 120 | -       | -       | -    | 4074.00 | 4290.00  | (5.0)      | 4075.00       | -       | (nan)      |
| p11_1090 | 120 | -       | -       | -    | 6665.00 | 6930.00  | (3.8)      | 6689.00       | -       | (nan)      |
| p11_110  | 120 | -       | -       | -    | 1014.00 | 1032.00  | (1.7)      | 1010.00       | -       | (nan)      |
| p11_3070 | 120 | -       | -       | -    | 6415.00 | 6726.00  | (4.6)      | 6451.00       | -       | (nan)      |
| p11_7090 | 120 | -       | -       | -    | 9924.00 | 10205.00 | (2.8)      | 9953.00       | -       | (nan)      |

**Table EC.16 Comparison with/without heuristic for the SDVRP with limited fleet and non-rounded costs, part 1/2**

| instance | C   | BK       |          |      | BC       |          |            | BC - no heur. |          |            |
|----------|-----|----------|----------|------|----------|----------|------------|---------------|----------|------------|
|          |     | LB       | UB       | time | LB       | UB       | time (gap) | LB            | UB       | time (gap) |
| S101D1   | 100 | 726.59   | 726.59   | 2636 | 726.59   | 726.59   | 2796       | 726.59        | 726.59   | 3209       |
| S101D2   | 100 | 1358.90  | 1378.43  | -    | 1298.71  | 1387.93  | (6.4)      | 1297.08       | -        | (nan)      |
| S101D3   | 100 | 1853.10  | 1874.81  | -    | 1786.92  | 1924.85  | (7.2)      | 1793.26       | -        | (nan)      |
| S101D5   | 100 | 2767.60  | 2791.22  | -    | 2712.98  | 2866.23  | (5.3)      | 2712.64       | -        | (nan)      |
| S51D1    | 50  | 459.50   | 459.50   | 0    | 459.50   | 459.50   | 27         | 459.50        | 459.50   | 1          |
| S51D2    | 50  | 708.42   | 708.42   | 368  | 708.42   | 708.42   | 146        | 708.42        | 708.42   | 304        |
| S51D3    | 50  | 940.82   | 947.97   | -    | 947.97   | 947.97   | 1398       | 947.97        | 947.97   | 1432       |
| S51D4    | 50  | 1553.47  | 1560.88  | -    | 1560.88  | 1560.88  | 695        | 1560.88       | 1560.88  | 689        |
| S51D5    | 50  | 1326.61  | 1333.67  | -    | 1330.24  | 1333.67  | (0.3)      | 1328.11       | 1333.67  | (0.4)      |
| S51D6    | 50  | 2165.64  | 2169.10  | -    | 2169.10  | 2169.10  | 2233       | 2169.10       | 2169.10  | 3837       |
| S76D1    | 75  | 598.94   | 598.94   | 164  | 598.94   | 598.94   | 57         | 598.94        | 598.94   | 89         |
| S76D2    | 75  | 1071.30  | 1087.40  | -    | 1050.85  | 1102.03  | (4.6)      | 1045.34       | 1137.21  | (8.1)      |
| S76D3    | 75  | 1407.54  | 1427.86  | -    | 1387.57  | 1438.24  | (3.5)      | 1383.55       | 1471.30  | (6.0)      |
| S76D4    | 75  | 2059.80  | 2079.76  | -    | 2049.88  | 2099.94  | (2.4)      | 2043.77       | 2151.85  | (5.0)      |
| SD1      | 8   | 228.28   | 228.28   | 0    | 228.28   | 228.28   | 1          | 228.28        | 228.28   | 0          |
| SD10     | 64  | 2684.88  | 2684.88  | 70   | 2670.17  | 2684.89  | (0.5)      | 2668.60       | 2684.88  | (0.6)      |
| SD11     | 80  | 13280.00 | 13280.00 | 5331 | 13280.00 | 13280.00 | 134        | 13280.00      | 13280.00 | 49         |
| SD12     | 80  | 7175.80  | 7213.61  | -    | 7153.52  | 7230.52  | (1.1)      | 7113.25       | 7506.42  | (5.2)      |
| SD13     | 96  | 10053.60 | 10110.58 | -    | 10015.90 | 10110.60 | (0.9)      | 10004.30      | -        | (nan)      |
| SD14     | 120 | 10588.20 | 10725.38 | -    | 10499.60 | 10837.70 | (3.1)      | 10499.60      | -        | (nan)      |
| SD15     | 144 | 14908.50 | 15129.68 | -    | 14755.80 | 15379.30 | (4.1)      | 14755.50      | -        | (nan)      |
| SD16     | 144 | 3381.30  | 3381.30  | 6    | 3381.08  | 3456.45  | (2.2)      | 3381.10       | 3524.34  | (4.1)      |
| SD17     | 160 | 26317.20 | 26533.39 | -    | 26236.40 | 26997.60 | (2.8)      | 26236.40      | -        | (nan)      |
| SD18     | 160 | 14029.20 | 14283.51 | -    | 13813.20 | 14619.30 | (5.5)      | 13813.10      | -        | (nan)      |
| SD19     | 192 | 19707.20 | 20191.20 | -    | 19424.90 | 20653.70 | (5.9)      | 19424.90      | -        | (nan)      |
| SD2      | 16  | 708.28   | 708.28   | 0    | 708.28   | 708.28   | 1          | 708.28        | 708.28   | 0          |
| SD20     | 240 | 39252.80 | 39840.00 | -    | 38724.40 | 40320.80 | (4.0)      | 38728.40      | -        | (nan)      |
| SD21     | 288 | 11271.10 | 11271.10 | 205  | 10974.80 | 11579.10 | (5.2)      | 10974.80      | -        | (nan)      |
| SD3      | 16  | 430.58   | 430.58   | 0    | 430.58   | 430.58   | 2          | 430.58        | 430.58   | 0          |
| SD4      | 24  | 631.05   | 631.05   | 0    | 631.05   | 631.05   | 3          | 631.05        | 631.05   | 0          |
| SD5      | 32  | 1390.57  | 1390.57  | 13   | 1390.57  | 1390.57  | 4          | 1390.57       | 1390.57  | 1          |
| SD6      | 32  | 831.24   | 831.24   | 0    | 831.24   | 831.24   | 4          | 831.24        | 831.24   | 2          |
| SD7      | 40  | 3640.00  | 3640.00  | 17   | 3640.00  | 3640.00  | 3          | 3640.00       | 3640.00  | 1          |
| SD8      | 48  | 5068.28  | 5068.28  | 67   | 5068.28  | 5068.28  | 12         | 5068.28       | 5068.28  | 5          |
| SD9      | 48  | 2044.20  | 2044.20  | 11   | 2044.20  | 2044.20  | 101        | 2044.20       | 2044.20  | 129        |
| eil22    | 21  | 375.28   | 375.28   | 0    | 375.28   | 375.28   | 2          | 375.28        | 375.28   | 0          |
| eil23    | 22  | 568.56   | 568.56   | 0    | 568.56   | 568.56   | 1          | 568.56        | 568.56   | 0          |
| eil30    | 29  | 512.72   | 512.72   | 8    | 512.72   | 512.72   | 9          | 512.72        | 512.72   | 3          |
| eil33    | 32  | 837.06   | 837.06   | 2    | 837.06   | 837.06   | 8          | 837.06        | 837.06   | 7          |
| eil51    | 50  | 524.61   | 524.61   | 17   | 524.61   | 524.61   | 22         | 524.61        | 524.61   | 8          |
| eilA101  | 100 | 810.06   | 826.14   | -    | 816.94   | 831.25   | (1.7)      | 812.38        | 849.31   | (4.3)      |
| eilA76   | 75  | 809.67   | 823.89   | -    | 806.91   | 827.23   | (2.5)      | 802.76        | 838.68   | (4.3)      |
| eilB101  | 100 | 1055.40  | 1076.26  | -    | 1023.93  | 1088.32  | (5.9)      | 1023.68       | -        | (nan)      |
| eilB76   | 75  | 985.42   | 1009.04  | -    | 966.46   | 1019.12  | (5.2)      | 960.11        | 1036.20  | (7.3)      |
| eilC76   | 75  | 724.62   | 738.67   | -    | 729.07   | 740.31   | (1.5)      | 728.47        | 738.67   | (1.4)      |
| eilD76   | 75  | 677.32   | 687.60   | -    | 682.67   | 686.70   | (0.6)      | 680.43        | 689.57   | (1.3)      |

Table EC.17 Comparison with/without heuristic for the SDVRP with limited fleet and non-rounded costs, part

2/2

| instance | C   | BK       |          |      | BC       |          |            | BC - no heur. |         |            |
|----------|-----|----------|----------|------|----------|----------|------------|---------------|---------|------------|
|          |     | LB       | UB       | time | LB       | UB       | time (gap) | LB            | UB      | time (gap) |
| p01_1030 | 50  | 756.71   | 756.71   | 915  | 756.71   | 756.71   | 343        | 756.71        | 756.71  | 401        |
| p01_1050 | 50  | 996.93   | 1005.75  | -    | 999.21   | 1005.75  | (0.7)      | 993.44        | 1008.11 | (1.5)      |
| p01_1090 | 50  | 1485.00  | 1487.18  | -    | 1487.18  | 1487.18  | 1326       | 1487.18       | 1487.18 | 1480       |
| p01_110  | 50  | 459.50   | 459.50   | 0    | 459.50   | 459.50   | 11         | 459.50        | 459.50  | 2          |
| p01_3070 | 50  | 1474.10  | 1481.71  | -    | 1472.36  | 1481.71  | (0.6)      | 1471.21       | 1481.71 | (0.7)      |
| p01_7090 | 50  | 2149.05  | 2156.14  | -    | 2152.60  | 2156.14  | (0.2)      | 2148.69       | 2156.14 | (0.3)      |
| p02_1030 | 75  | 1093.56  | 1122.91  | -    | 1064.84  | 1125.36  | (5.4)      | 1061.91       | 1123.82 | (5.5)      |
| p02_1050 | 75  | 1483.17  | 1509.79  | -    | 1464.75  | 1508.10  | (2.9)      | 1462.68       | 1505.44 | (2.8)      |
| p02_1090 | 75  | 2270.44  | 2372.22  | -    | 2263.33  | 2327.94  | (2.8)      | 2262.91       | -       | (nan)      |
| p02_110  | 75  | 616.58   | 617.85   | -    | 617.85   | 617.85   | 4680       | 617.85        | 617.85  | 3426       |
| p02_3070 | 75  | 2192.25  | 2235.61  | -    | 2170.06  | 2239.89  | (3.1)      | 2167.81       | 2265.71 | (4.3)      |
| p02_7090 | 75  | 3192.10  | 3253.71  | -    | 3179.68  | 3262.83  | (2.5)      | 3177.07       | 3376.84 | (5.9)      |
| p03_1030 | 100 | 1435.23  | 1491.82  | -    | 1368.80  | 1480.01  | (7.5)      | 1367.25       | -       | (nan)      |
| p03_1050 | 100 | 1971.43  | 2018.09  | -    | 1911.33  | 2038.20  | (6.2)      | 1908.34       | -       | (nan)      |
| p03_1090 | 100 | 3043.27  | 3136.29  | -    | 3008.80  | 3119.57  | (3.6)      | 3005.79       | -       | (nan)      |
| p03_110  | 100 | 753.12   | 762.40   | -    | 756.25   | 760.00   | (0.5)      | 757.09        | 760.19  | (0.4)      |
| p03_3070 | 100 | 2945.76  | 3044.92  | -    | 2898.70  | 3030.84  | (4.4)      | 2900.25       | -       | (nan)      |
| p03_7090 | 100 | 4316.42  | 4452.55  | -    | 4302.24  | 4417.50  | (2.6)      | 4303.26       | -       | (nan)      |
| p04_1030 | 150 | 1986.79  | 2109.45  | -    | 1886.15  | 2052.27  | (8.1)      | 1886.95       | -       | (nan)      |
| p04_1050 | 150 | 2811.64  | 2956.18  | -    | 2708.02  | 2909.28  | (6.9)      | 2708.02       | -       | (nan)      |
| p04_1090 | 150 | 4474.18  | 4708.11  | -    | 4389.91  | 4622.66  | (5.0)      | 4389.55       | -       | (nan)      |
| p04_110  | 150 | 896.03   | 1065.94  | -    | 899.53   | 926.94   | (3.0)      | 897.78        | -       | (nan)      |
| p04_3070 | 150 | 4269.77  | 4637.69  | -    | 4174.84  | 4464.12  | (6.5)      | 4174.45       | -       | (nan)      |
| p04_7090 | 150 | 6287.09  | 6529.63  | -    | 6232.93  | 6481.48  | (3.8)      | 6229.21       | -       | (nan)      |
| p05_1030 | 199 | 2423.64  | 2632.22  | -    | 2259.42  | 2524.65  | (10.5)     | 2259.42       | -       | (nan)      |
| p05_1050 | 199 | 3420.17  | 3548.13  | -    | 3205.67  | 3542.18  | (9.5)      | 3209.69       | -       | (nan)      |
| p05_1090 | 199 | 5425.69  | 5894.69  | -    | 5240.85  | 5656.48  | (7.3)      | 5240.97       | -       | (nan)      |
| p05_110  | 199 | 1042.37  | 1188.45  | -    | 1029.40  | 1112.60  | (7.5)      | 1030.01       | -       | (nan)      |
| p05_3070 | 199 | 5306.11  | 5669.69  | -    | 5138.50  | 5557.55  | (7.5)      | 5138.81       | -       | (nan)      |
| p05_7090 | 199 | 8062.24  | 8400.74  | -    | 7936.82  | 8323.17  | (4.6)      | 7938.66       | -       | (nan)      |
| p10_1030 | 199 | -        | -        | -    | 2259.42  | 2524.65  | (10.5)     | 2259.42       | -       | (nan)      |
| p10_1050 | 199 | -        | -        | -    | 3205.67  | 3542.18  | (9.5)      | 3209.69       | -       | (nan)      |
| p10_1090 | 199 | -        | -        | -    | 5240.85  | 5656.48  | (7.3)      | 5240.97       | -       | (nan)      |
| p10_110  | 199 | -        | -        | -    | 1029.62  | 1112.60  | (7.5)      | 1030.01       | -       | (nan)      |
| p10_3070 | 199 | -        | -        | -    | 5138.50  | 5557.55  | (7.5)      | 5138.50       | -       | (nan)      |
| p10_7090 | 199 | -        | -        | -    | 7937.69  | 8323.17  | (4.6)      | 7937.51       | -       | (nan)      |
| p11_1030 | 120 | 2879.63  | 2988.61  | -    | 2845.77  | 3012.26  | (5.5)      | 2847.04       | -       | (nan)      |
| p11_1050 | 120 | 4162.99  | 4308.17  | -    | 4167.34  | 4350.64  | (4.2)      | 4166.99       | -       | (nan)      |
| p11_1090 | 120 | 6808.07  | 7020.87  | -    | 6732.76  | 7034.31  | (4.3)      | 6702.79       | -       | (nan)      |
| p11_110  | 120 | 1023.37  | 1063.73  | -    | 1027.54  | 1043.57  | (1.5)      | 1022.48       | -       | (nan)      |
| p11_3070 | 120 | 6584.11  | 6860.65  | -    | 6537.36  | 6748.64  | (3.1)      | 6528.81       | -       | (nan)      |
| p11_7090 | 120 | 10111.11 | 10456.19 | -    | 10065.00 | 10322.50 | (2.5)      | 10082.50      | -       | (nan)      |

**Table EC.18 Comparison with/without heuristic for the SDVRP with unlimited fleet and rounded costs, part 1/2**

| instance | C   | BK       |          |      | BC       |          |            | BC - no heur. |          |            |
|----------|-----|----------|----------|------|----------|----------|------------|---------------|----------|------------|
|          |     | LB       | UB       | time | LB       | UB       | time (gap) | LB            | UB       | time (gap) |
| S101D1   | 100 | 714.87   | 716.00   | -    | 716.00   | 716.00   | 4374       | 716.00        | 716.00   | 4161       |
| S101D2   | 100 | 1301.93  | 1366.00  | -    | 1277.00  | 1374.00  | (7.1)      | 1277.00       | 1450.00  | (11.9)     |
| S101D3   | 100 | 1803.51  | 1864.00  | -    | 1772.00  | 1890.00  | (6.2)      | 1769.00       | -        | (nan)      |
| S101D5   | 100 | 2709.48  | 2770.00  | -    | 2668.00  | 2804.00  | (4.9)      | 2665.00       | 2867.00  | (7.0)      |
| S51D1    | 50  | 458.00   | 458.00   | 20   | 458.00   | 458.00   | 14         | 458.00        | 458.00   | 2          |
| S51D2    | 50  | 703.00   | 703.00   | 674  | 703.00   | 703.00   | 198        | 703.00        | 703.00   | 265        |
| S51D3    | 50  | 933.07   | 943.00   | -    | 942.00   | 942.00   | 944        | 942.00        | 942.00   | 5328       |
| S51D4    | 50  | 1547.44  | 1551.00  | -    | 1551.00  | 1551.00  | 2266       | 1551.00       | 1551.00  | 2272       |
| S51D5    | 50  | 1326.73  | 1328.00  | -    | 1316.00  | 1328.00  | (0.9)      | 1315.00       | 1328.00  | (1.0)      |
| S51D6    | 50  | 2153.00  | 2153.00  | 4110 | 2147.00  | 2166.00  | (0.9)      | 2153.00       | 2153.00  | 4537       |
| S76D1    | 75  | 592.00   | 592.00   | 134  | 592.00   | 592.00   | 101        | 592.00        | 592.00   | 147        |
| S76D2    | 75  | 1040.67  | 1082.00  | -    | 1039.00  | 1092.00  | (4.9)      | 1038.00       | 1092.00  | (4.9)      |
| S76D3    | 75  | 1379.57  | 1420.00  | -    | 1375.00  | 1434.00  | (4.1)      | 1370.00       | 1442.00  | (5.0)      |
| S76D4    | 75  | 2034.70  | 2073.00  | -    | 2030.00  | 2096.00  | (3.1)      | 2026.00       | 2205.00  | (8.1)      |
| SD1      | 8   | 228.00   | 228.00   | 0    | 228.00   | 228.00   | 0          | 228.00        | 228.00   | 0          |
| SD10     | 64  | 2688.00  | 2688.00  | 2317 | 2670.00  | 2698.00  | (1.0)      | 2672.00       | 2697.00  | (0.9)      |
| SD11     | 80  | 13280.00 | 13280.00 | 999  | 13280.00 | 13280.00 | 140        | 13280.00      | 13280.00 | 83         |
| SD12     | 80  | 7133.81  | 7279.00  | -    | 7168.00  | 7221.00  | (0.7)      | 7160.00       | 7314.00  | (2.1)      |
| SD13     | 96  | 9992.94  | 10112.00 | -    | 10033.00 | 10232.00 | (1.9)      | 10028.00      | 10442.00 | (4.0)      |
| SD14     | 120 | -        | -        | -    | 10485.00 | 10819.00 | (3.1)      | 10482.00      | 11296.00 | (7.2)      |
| SD15     | 144 | -        | -        | -    | 14776.00 | 15159.00 | (2.5)      | 14775.00      | -        | (nan)      |
| SD16     | 144 | -        | -        | -    | 3348.00  | 3491.00  | (4.1)      | 3347.00       | 3599.00  | (7.0)      |
| SD17     | 160 | -        | -        | -    | 26269.00 | 26883.00 | (2.3)      | 26269.00      | -        | (nan)      |
| SD18     | 160 | -        | -        | -    | 13826.00 | 14507.00 | (4.7)      | 13827.00      | -        | (nan)      |
| SD19     | 192 | -        | -        | -    | 19418.00 | 20408.00 | (4.9)      | 19418.00      | -        | (nan)      |
| SD2      | 16  | 708.00   | 708.00   | 0    | 708.00   | 708.00   | 1          | 708.00        | 708.00   | 0          |
| SD20     | 240 | -        | -        | -    | 38697.70 | 40657.00 | (4.8)      | 38670.10      | -        | (nan)      |
| SD21     | 288 | -        | -        | -    | 10956.00 | 11669.00 | (6.1)      | 10959.00      | 12110.00 | (9.5)      |
| SD3      | 16  | 432.00   | 432.00   | 0    | 432.00   | 432.00   | 2          | 432.00        | 432.00   | 0          |
| SD4      | 24  | 630.00   | 630.00   | 1    | 630.00   | 630.00   | 3          | 630.00        | 630.00   | 0          |
| SD5      | 32  | 1392.00  | 1392.00  | 15   | 1392.00  | 1392.00  | 4          | 1392.00       | 1392.00  | 3          |
| SD6      | 32  | 832.00   | 832.00   | 3    | 832.00   | 832.00   | 4          | 832.00        | 832.00   | 1          |
| SD7      | 40  | 3640.00  | 3640.00  | 26   | 3640.00  | 3640.00  | 4          | 3640.00       | 3640.00  | 3          |
| SD8      | 48  | 5068.00  | 5068.00  | 33   | 5068.00  | 5068.00  | 11         | 5068.00       | 5068.00  | 4          |
| SD9      | 48  | 2046.00  | 2046.00  | 174  | 2046.00  | 2046.00  | 126        | 2046.00       | 2046.00  | 131        |
| eil22    | 21  | 375.00   | 375.00   | 1    | 375.00   | 375.00   | 2          | 375.00        | 375.00   | 0          |
| eil23    | 22  | 569.00   | 569.00   | 2    | 569.00   | 569.00   | 1          | 569.00        | 569.00   | 0          |
| eil30    | 29  | 503.00   | 503.00   | 1    | 503.00   | 503.00   | 3          | 503.00        | 503.00   | 0          |
| eil33    | 32  | 835.00   | 835.00   | 12   | 835.00   | 835.00   | 5          | 835.00        | 835.00   | 1          |
| eil51    | 50  | 521.00   | 521.00   | 61   | 521.00   | 521.00   | 20         | 521.00        | 521.00   | 12         |
| eilA101  | 100 | 792.40   | 814.00   | -    | 806.00   | 817.00   | (1.3)      | 802.00        | 839.00   | (4.4)      |
| eilA76   | 75  | 792.71   | 818.00   | -    | 799.00   | 823.00   | (2.9)      | 795.00        | 846.00   | (6.0)      |
| eilB101  | 100 | 1017.77  | 1061.00  | -    | 1012.00  | 1071.00  | (5.5)      | 1013.00       | -        | (nan)      |
| eilB76   | 75  | 957.60   | 1002.00  | -    | 956.00   | 1015.00  | (5.8)      | 955.00        | 1021.00  | (6.5)      |
| eilC76   | 75  | 714.24   | 733.00   | -    | 721.00   | 734.00   | (1.8)      | 723.00        | 733.00   | (1.4)      |
| eilD76   | 75  | 667.93   | 682.00   | -    | 679.00   | 679.00   | 5746       | 672.00        | 682.00   | (1.5)      |

Table EC.19 Comparison with/without heuristic for the SDVRP with unlimited fleet and rounded costs, part

2/2

| instance | C   | BK      |         |      | BC      |          |            | BC - no heur. |          |            |
|----------|-----|---------|---------|------|---------|----------|------------|---------------|----------|------------|
|          |     | LB      | UB      | time | LB      | UB       | time (gap) | LB            | UB       | time (gap) |
| p01_1030 | 50  | 752.00  | 753.00  | -    | 753.00  | 753.00   | 415        | 753.00        | 753.00   | 841        |
| p01_1050 | 50  | 991.36  | 998.00  | -    | 998.00  | 998.00   | 6710       | 991.00        | 998.00   | (0.7)      |
| p01_1090 | 50  | 1480.00 | 1480.00 | 3725 | 1480.00 | 1480.00  | 3655       | 1472.00       | 1481.00  | (0.6)      |
| p01_110  | 50  | 458.00  | 458.00  | 10   | 458.00  | 458.00   | 17         | 458.00        | 458.00   | 2          |
| p01_3070 | 50  | 1473.00 | 1473.00 | 6953 | 1458.00 | 1479.00  | (1.4)      | 1454.00       | 1479.00  | (1.7)      |
| p01_7090 | 50  | 2134.87 | 2142.00 | -    | 2133.00 | 2142.00  | (0.4)      | 2134.00       | 2142.00  | (0.4)      |
| p02_1030 | 75  | 1062.36 | 1172.00 | -    | 1061.00 | 1108.00  | (4.2)      | 1058.00       | 1153.00  | (8.2)      |
| p02_1050 | 75  | 1456.12 | 1557.00 | -    | 1451.00 | 1499.00  | (3.2)      | 1452.00       | 1515.00  | (4.2)      |
| p02_1090 | 75  | 2258.51 | 2304.00 | -    | 2246.00 | 2305.00  | (2.6)      | 2242.00       | 2297.00  | (2.4)      |
| p02_110  | 75  | 609.19  | 612.00  | -    | 612.00  | 612.00   | 3254       | 609.00        | 613.00   | (0.7)      |
| p02_3070 | 75  | 2177.37 | 2253.00 | -    | 2153.00 | 2234.00  | (3.6)      | 2155.00       | 2289.00  | (5.9)      |
| p02_7090 | 75  | 3171.95 | 3233.00 | -    | 3163.00 | 3230.00  | (2.1)      | 3161.00       | 3363.00  | (6.0)      |
| p03_1030 | 100 | 1379.18 | 1542.00 | -    | 1357.00 | 1456.00  | (6.8)      | 1355.00       | 1502.00  | (9.8)      |
| p03_1050 | 100 | 1925.21 | 2053.00 | -    | 1889.00 | 2014.00  | (6.2)      | 1890.00       | -        | (nan)      |
| p03_1090 | 100 | 3005.48 | 3152.00 | -    | 2965.00 | 3098.00  | (4.3)      | 2966.00       | 3274.00  | (9.4)      |
| p03_110  | 100 | 737.64  | 762.00  | -    | 744.00  | 750.00   | (0.8)      | 743.00        | 751.00   | (1.1)      |
| p03_3070 | 100 | 2909.22 | 3049.00 | -    | 2860.00 | 3001.00  | (4.7)      | 2855.00       | 3177.00  | (10.1)     |
| p03_7090 | 100 | 4251.65 | 4404.00 | -    | 4245.00 | 4368.00  | (2.8)      | 4247.00       | 4563.00  | (6.9)      |
| p04_1030 | 150 | -       | -       | -    | 1846.00 | 2034.00  | (9.2)      | 1847.00       | -        | (nan)      |
| p04_1050 | 150 | -       | -       | -    | 2639.00 | 2860.00  | (7.7)      | 2641.00       | -        | (nan)      |
| p04_1090 | 150 | -       | -       | -    | 4299.00 | 4573.00  | (6.0)      | 4300.00       | -        | (nan)      |
| p04_110  | 150 | -       | -       | -    | 889.00  | 947.00   | (6.1)      | 887.00        | -        | (nan)      |
| p04_3070 | 150 | -       | -       | -    | 4062.00 | 4416.00  | (8.0)      | 4063.00       | -        | (nan)      |
| p04_7090 | 150 | -       | -       | -    | 6113.00 | 6420.00  | (4.8)      | 6102.00       | 6563.00  | (7.0)      |
| p05_1030 | 199 | -       | -       | -    | 2194.51 | 2480.00  | (11.5)     | 2194.51       | -        | (nan)      |
| p05_1050 | 199 | -       | -       | -    | 3178.00 | 3510.00  | (9.5)      | 3179.00       | -        | (nan)      |
| p05_1090 | 199 | -       | -       | -    | 5167.00 | 5579.00  | (7.4)      | 5167.00       | -        | (nan)      |
| p05_110  | 199 | -       | -       | -    | 1015.00 | 1126.00  | (9.9)      | 1012.81       | -        | (nan)      |
| p05_3070 | 199 | -       | -       | -    | 5041.00 | 5484.00  | (8.1)      | 5042.00       | -        | (nan)      |
| p05_7090 | 199 | -       | -       | -    | 7807.00 | 8206.00  | (4.9)      | 7809.00       | 8478.00  | (7.9)      |
| p10_1030 | 199 | -       | -       | -    | 2194.51 | 2480.00  | (11.5)     | 2194.51       | -        | (nan)      |
| p10_1050 | 199 | -       | -       | -    | 3178.00 | 3510.00  | (9.5)      | 3179.00       | -        | (nan)      |
| p10_1090 | 199 | -       | -       | -    | 5167.00 | 5579.00  | (7.4)      | 5167.00       | -        | (nan)      |
| p10_110  | 199 | -       | -       | -    | 1015.00 | 1126.00  | (9.9)      | 1015.00       | -        | (nan)      |
| p10_3070 | 199 | -       | -       | -    | 5041.00 | 5484.00  | (8.1)      | 5041.00       | -        | (nan)      |
| p10_7090 | 199 | -       | -       | -    | 7807.00 | 8206.00  | (4.9)      | 7809.00       | 8478.00  | (7.9)      |
| p11_1030 | 120 | -       | -       | -    | 2791.00 | 2976.00  | (6.2)      | 2791.00       | -        | (nan)      |
| p11_1050 | 120 | -       | -       | -    | 4089.00 | 4296.00  | (4.8)      | 4092.00       | -        | (nan)      |
| p11_1090 | 120 | -       | -       | -    | 6673.00 | 6982.00  | (4.4)      | 6675.00       | 7506.00  | (11.1)     |
| p11_110  | 120 | -       | -       | -    | 1013.00 | 1032.00  | (1.8)      | 1009.00       | -        | (nan)      |
| p11_3070 | 120 | -       | -       | -    | 6436.00 | 6663.00  | (3.4)      | 6428.00       | -        | (nan)      |
| p11_7090 | 120 | -       | -       | -    | 9922.00 | 10193.00 | (2.7)      | 9919.00       | 10602.00 | (6.4)      |

**Table EC.20 Comparison with/without heuristic for the SDVRP with unlimited fleet and non-rounded costs, part 1/2**

| instance | C   | BK       |          |       | BC       |          |            | BC - no heur. |          |            |
|----------|-----|----------|----------|-------|----------|----------|------------|---------------|----------|------------|
|          |     | LB       | UB       | time  | LB       | UB       | time (gap) | LB            | UB       | time (gap) |
| S101D1   | 100 | 716.92   | 726.59   | -     | 726.59   | 726.59   | 3318       | 726.59        | 726.59   | 1839       |
| S101D2   | 100 | 1356.78  | 1378.43  | -     | 1296.13  | 1394.67  | (7.1)      | 1294.54       | -        | (nan)      |
| S101D3   | 100 | 1845.07  | 1874.81  | -     | 1784.59  | 1921.54  | (7.1)      | 1787.46       | 1952.65  | (8.5)      |
| S101D5   | 100 | 2758.21  | 2791.22  | -     | 2687.48  | 2816.49  | (4.6)      | 2700.65       | 2864.95  | (5.7)      |
| S51D1    | 50  | 459.50   | 459.50   | 13    | 459.50   | 459.50   | 17         | 459.50        | 459.50   | 3          |
| S51D2    | 50  | 708.42   | 708.42   | 2376  | 708.42   | 708.42   | 248        | 708.42        | 708.42   | 261        |
| S51D3    | 50  | 947.97   | 947.97   | 20738 | 947.97   | 947.97   | 1486       | 947.97        | 947.97   | 1719       |
| S51D4    | 50  | 1560.88  | 1560.88  | 3827  | 1560.88  | 1560.88  | 3860       | 1560.88       | 1560.88  | 1605       |
| S51D5    | 50  | 1333.67  | 1333.67  | 6310  | 1329.62  | 1333.67  | (0.3)      | 1327.61       | 1333.67  | (0.5)      |
| S51D6    | 50  | 2169.10  | 2169.10  | 16755 | 2169.10  | 2169.10  | 6414       | 2169.10       | 2169.10  | 5457       |
| S76D1    | 75  | 598.94   | 598.94   | 563   | 598.94   | 598.94   | 88         | 598.94        | 598.94   | 352        |
| S76D2    | 75  | 1066.88  | 1087.40  | -     | 1044.45  | 1098.92  | (5.0)      | 1041.00       | 1130.75  | (7.9)      |
| S76D3    | 75  | 1406.85  | 1427.86  | -     | 1385.89  | 1438.24  | (3.6)      | 1382.38       | 1457.72  | (5.2)      |
| S76D4    | 75  | 2053.66  | 2079.76  | -     | 2046.84  | 2088.79  | (2.0)      | 2047.92       | 2095.51  | (2.3)      |
| SD1      | 8   | 228.28   | 228.28   | 0     | 228.28   | 228.28   | 0          | 228.28        | 228.28   | 0          |
| SD10     | 64  | 2684.86  | 2684.88  | 1903  | 2667.57  | 2684.88  | (0.6)      | 2661.18       | 2692.70  | (1.2)      |
| SD11     | 80  | 13280.00 | 13280.00 | 1340  | 13280.00 | 13280.00 | 122        | 13280.00      | 13280.00 | 998        |
| SD12     | 80  | 7135.27  | 7270.87  | -     | 7159.98  | 7242.17  | (1.1)      | 7159.92       | 7221.58  | (0.9)      |
| SD13     | 96  | 9992.74  | 10110.58 | -     | 10035.20 | 10110.60 | (0.7)      | 10026.50      | 10110.60 | (0.8)      |
| SD14     | 120 | 10502.76 | 10754.70 | -     | 10487.90 | 10849.10 | (3.3)      | 10484.10      | 11062.20 | (5.2)      |
| SD15     | 144 | 14787.05 | 15151.10 | -     | 14755.40 | 15342.60 | (3.8)      | 14755.30      | -        | (nan)      |
| SD16     | 144 | 3379.33  | 3379.33  | 9772  | 3349.78  | 3467.84  | (3.4)      | 3379.34       | 3482.86  | (3.0)      |
| SD17     | 160 | 26166.80 | 26547.44 | -     | 26226.00 | 26798.50 | (2.1)      | 26226.00      | -        | (nan)      |
| SD18     | 160 | 13892.74 | 14334.03 | -     | 13808.00 | 14438.30 | (4.4)      | 13806.20      | -        | (nan)      |
| SD19     | 192 | 19584.84 | 20191.20 | -     | 19457.50 | 20562.10 | (5.4)      | 19457.50      | -        | (nan)      |
| SD2      | 16  | 708.28   | 708.28   | 0     | 708.28   | 708.28   | 1          | 708.28        | 708.28   | 0          |
| SD20     | 240 | 38901.37 | 39840.00 | -     | 38734.90 | 40375.30 | (4.1)      | 38742.30      | -        | (nan)      |
| SD21     | 288 | 11254.83 | 11271.10 | -     | 10971.40 | 11592.60 | (5.4)      | 10975.80      | -        | (nan)      |
| SD3      | 16  | 430.58   | 430.58   | 0     | 430.58   | 430.58   | 2          | 430.58        | 430.58   | 0          |
| SD4      | 24  | 631.05   | 631.05   | 1     | 631.05   | 631.05   | 4          | 631.05        | 631.05   | 0          |
| SD5      | 32  | 1390.57  | 1390.57  | 51    | 1390.57  | 1390.57  | 5          | 1390.57       | 1390.57  | 3          |
| SD6      | 32  | 831.24   | 831.24   | 4     | 831.24   | 831.24   | 4          | 831.24        | 831.24   | 1          |
| SD7      | 40  | 3640.00  | 3640.00  | 55    | 3640.00  | 3640.00  | 4          | 3640.00       | 3640.00  | 2          |
| SD8      | 48  | 5068.28  | 5068.28  | 72    | 5068.28  | 5068.28  | 7          | 5068.28       | 5068.28  | 9          |
| SD9      | 48  | 2044.20  | 2044.20  | 267   | 2044.20  | 2044.20  | 114        | 2044.20       | 2044.20  | 88         |
| eil22    | 21  | 375.28   | 375.28   | 6     | 375.28   | 375.28   | 2          | 375.28        | 375.28   | 0          |
| eil23    | 22  | 568.56   | 568.56   | 1     | 568.56   | 568.56   | 1          | 568.56        | 568.56   | 0          |
| eil30    | 29  | 505.01   | 505.01   | 2     | 505.01   | 505.01   | 3          | 505.01        | 505.01   | 0          |
| eil33    | 32  | 837.06   | 837.06   | 46    | 837.06   | 837.06   | 7          | 837.06        | 837.06   | 4          |
| eil51    | 50  | 524.61   | 524.61   | 95    | 524.61   | 524.61   | 16         | 524.61        | 524.61   | 25         |
| eilA101  | 100 | 804.40   | 826.14   | -     | 815.00   | 835.79   | (2.5)      | 814.03        | 831.85   | (2.1)      |
| eilA76   | 75  | 809.58   | 823.89   | -     | 805.25   | 828.75   | (2.8)      | 801.80        | 829.31   | (3.3)      |
| eilB101  | 100 | 1055.59  | 1076.26  | -     | 1023.72  | 1088.19  | (5.9)      | 1023.38       | -        | (nan)      |
| eilB76   | 75  | 984.13   | 1009.04  | -     | 962.02   | 1015.83  | (5.3)      | 961.93        | 1039.84  | (7.5)      |
| eilC76   | 75  | 722.76   | 738.67   | -     | 728.73   | 738.67   | (1.3)      | 727.68        | 739.19   | (1.6)      |
| eilD76   | 75  | 674.17   | 687.60   | -     | 681.31   | 690.17   | (1.3)      | 681.44        | 687.60   | (0.9)      |

**Table EC.21 Comparison with/without heuristic for the SDVRP with unlimited fleet and non-rounded costs, part 2/2**

| instance | C   | BK       |          |       | BC       |          |            | BC - no heur. |          |            |
|----------|-----|----------|----------|-------|----------|----------|------------|---------------|----------|------------|
|          |     | LB       | UB       | time  | LB       | UB       | time (gap) | LB            | UB       | time (gap) |
| p01_1030 | 50  | 756.70   | 756.71   | 20494 | 756.71   | 756.71   | 281        | 756.71        | 756.71   | 771        |
| p01_1050 | 50  | 1005.75  | 1005.75  | 23257 | 998.04   | 1005.75  | (0.8)      | 998.39        | 1005.75  | (0.7)      |
| p01_1090 | 50  | 1487.18  | 1487.18  | 7155  | 1487.18  | 1487.18  | 1388       | 1487.18       | 1487.18  | 2627       |
| p01_110  | 50  | 459.50   | 459.50   | 8     | 459.50   | 459.50   | 12         | 459.50        | 459.50   | 3          |
| p01_3070 | 50  | 1481.71  | 1481.71  | 12418 | 1473.52  | 1481.71  | (0.6)      | 1473.15       | 1481.71  | (0.6)      |
| p01_7090 | 50  | 2155.80  | 2155.80  | 42587 | 2155.80  | 2155.80  | 7098       | 2155.80       | 2155.80  | 5994       |
| p02_1030 | 75  | 1095.65  | 1121.82  | -     | 1067.52  | 1119.73  | (4.7)      | 1065.00       | 1136.78  | (6.3)      |
| p02_1050 | 75  | 1482.50  | 1514.39  | -     | 1461.17  | 1509.02  | (3.2)      | 1460.07       | 1523.69  | (4.2)      |
| p02_1090 | 75  | 2272.05  | 2318.28  | -     | 2259.26  | 2329.53  | (3.0)      | 2255.66       | 2474.10  | (8.8)      |
| p02_110  | 75  | 612.45   | 617.85   | -     | 617.85   | 617.85   | 5415       | 615.90        | 617.85   | (0.3)      |
| p02_3070 | 75  | 2190.16  | 2237.19  | -     | 2172.76  | 2253.51  | (3.6)      | 2169.77       | 2237.96  | (3.0)      |
| p02_7090 | 75  | 3192.55  | 3232.15  | -     | 3181.27  | 3237.92  | (1.7)      | 3178.80       | 3276.74  | (3.0)      |
| p03_1030 | 100 | 1437.78  | 1477.35  | -     | 1369.50  | 1480.01  | (7.5)      | 1367.52       | 1535.92  | (11.0)     |
| p03_1050 | 100 | 1971.34  | 2040.92  | -     | 1898.68  | 2038.20  | (6.8)      | 1897.86       | -        | (nan)      |
| p03_1090 | 100 | 3042.93  | 3127.06  | -     | 3001.04  | 3115.42  | (3.7)      | 3007.12       | 3174.78  | (5.3)      |
| p03_110  | 100 | 749.42   | 769.42   | -     | 759.38   | 760.00   | (0.1)      | 756.71        | 760.00   | (0.4)      |
| p03_3070 | 100 | 2945.42  | 3030.66  | -     | 2896.12  | 3026.71  | (4.3)      | 2883.15       | 3150.10  | (8.5)      |
| p03_7090 | 100 | 4334.44  | 4417.57  | -     | 4305.20  | 4436.99  | (3.0)      | 4299.22       | 4518.45  | (4.9)      |
| p04_1030 | 150 | 1986.34  | 2066.46  | -     | 1876.92  | 2056.87  | (8.7)      | 1876.92       | -        | (nan)      |
| p04_1050 | 150 | 2811.98  | 2917.80  | -     | 2699.47  | 2901.97  | (7.0)      | 2699.47       | -        | (nan)      |
| p04_1090 | 150 | 4474.92  | 4665.87  | -     | 4388.76  | 4624.60  | (5.1)      | 4389.84       | -        | (nan)      |
| p04_110  | 150 | 895.46   | 947.14   | -     | 895.02   | 966.90   | (7.4)      | 896.26        | -        | (nan)      |
| p04_3070 | 150 | 4267.33  | 4438.76  | -     | 4153.56  | 4455.14  | (6.8)      | 4159.68       | -        | (nan)      |
| p04_7090 | 150 | 6284.76  | 6482.19  | -     | 6216.65  | 6457.37  | (3.7)      | 6218.88       | 6614.99  | (6.0)      |
| p05_1030 | 199 | 2423.99  | 2583.29  | -     | 2254.17  | 2528.69  | (10.9)     | 2254.17       | -        | (nan)      |
| p05_1050 | 199 | 3420.23  | 3568.25  | -     | 3244.54  | 3542.18  | (8.4)      | 3244.54       | -        | (nan)      |
| p05_1090 | 199 | 5422.95  | 5673.18  | -     | 5257.30  | 5627.28  | (6.6)      | 5257.79       | -        | (nan)      |
| p05_110  | 199 | 1042.37  | 1148.27  | -     | 1028.84  | 1117.58  | (7.9)      | 1029.71       | -        | (nan)      |
| p05_3070 | 199 | 5304.09  | 5559.29  | -     | 5147.61  | 5505.91  | (6.5)      | 5147.90       | -        | (nan)      |
| p05_7090 | 199 | 8062.14  | 8359.65  | -     | 7937.06  | 8301.59  | (4.4)      | 7937.34       | -        | (nan)      |
| p10_1030 | 199 | -        | -        | -     | 2254.17  | 2528.69  | (10.9)     | 2254.17       | -        | (nan)      |
| p10_1050 | 199 | -        | -        | -     | 3244.54  | 3542.18  | (8.4)      | 3244.54       | -        | (nan)      |
| p10_1090 | 199 | -        | -        | -     | 5257.30  | 5627.28  | (6.6)      | 5257.30       | -        | (nan)      |
| p10_110  | 199 | -        | -        | -     | 1028.68  | 1117.58  | (8.0)      | 1029.65       | -        | (nan)      |
| p10_3070 | 199 | -        | -        | -     | 5147.73  | 5505.94  | (6.5)      | 5147.73       | -        | (nan)      |
| p10_7090 | 199 | -        | -        | -     | 7937.06  | 8301.59  | (4.4)      | 7937.34       | -        | (nan)      |
| p11_1030 | 120 | 2867.79  | 2983.82  | -     | 2844.93  | 3017.20  | (5.7)      | 2837.99       | -        | (nan)      |
| p11_1050 | 120 | 4156.68  | 4259.94  | -     | 4168.03  | 4350.64  | (4.2)      | 4167.64       | -        | (nan)      |
| p11_1090 | 120 | 6780.19  | 6995.85  | -     | 6738.52  | 7173.25  | (6.1)      | 6742.81       | 7706.19  | (12.5)     |
| p11_110  | 120 | 1023.39  | 1055.28  | -     | 1024.49  | 1049.30  | (2.4)      | 1022.65       | -        | (nan)      |
| p11_3070 | 120 | 6593.28  | 6822.31  | -     | 6542.85  | 6711.40  | (2.5)      | 6550.62       | 7548.56  | (13.2)     |
| p11_7090 | 120 | 10113.55 | 10376.94 | -     | 10111.30 | 10342.90 | (2.2)      | 10109.40      | 10664.20 | (5.2)      |
